# Supplementary material
Source: Frontiers journal article supplement (https://www.frontiersin.org/articles/318948)
Supplement: Data_Sheet_1.ZIP [file Data_Sheet_1.ZIP]

| g.SAHARA (all tasks)        |            |            |            |            |            |            |            |            |            |            |            |            |            |            |            |            |            |            |            |
|-----------------------------|------------|------------|------------|------------|------------|------------|------------|------------|------------|------------|------------|------------|------------|------------|------------|------------|------------|------------|------------|
| Proportion of artifacts [%] |            |            |            |            |            |            |            |            |            |            |            |            |            |            |            |            |            |            |            |
| Vp                          | Fp1        | Fp2        | F3         | Fz         | F4         | T7         | C3         | Cz         | C4         | T8         | P3         | Pz         | P4         | PO7        | PO8        | Oz         | mean       | median     | std        |
| 11                          | 18.0972718 | 15.9827716 | 56.5924567 | 39.960554  | 26.8637087 | 60.74941   | 60.1649019 | 59.4822867 | 45.4082151 | 44.6562548 | 55.4120191 | 47.9189843 | 41.672868  | 75.3950081 | 66.3874944 | 84.5381801 | 49.9551491 | 51.6655017 | 19.0126196 |
| 12                          | 13.4215159 | 13.2720315 | 14.962589  | 20.603485  | 15.3968073 | 22.0479739 | 22.4665269 | 21.909348  | 27.4602384 | 17.2628019 | 19.2026917 | 33.1671421 | 17.9675485 | 18.2230794 | 23.2998814 | 33.2844754 | 20.8717585 | 19.9030884 | 6.15925757 |
| 13                          | 37.3253066 | 38.8597112 | 53.5934538 | 56.3304322 | 51.5958721 | 79.6000621 | 70.7975082 | 40.7541014 | 58.2790138 | 68.2352665 | 51.2032301 | 46.5620511 | 54.842433  | 51.7817794 | 98.5537311 | 98.9490377 | 59.8289369 | 54.2179434 | 18.9440895 |
| 14                          | 0.22414748 | 0.96414459 | 1.83125667 | 0.87811686 | 1.6095433  | 1.2195323  | 1.29671131 | 0.95110049 | 0.8058599  | 0.79394457 | 0.75392406 | 0.63939474 | 0.2429469  | 0.26969289 | 0.18386476 | 0.95205946 | 0.85101502 | 0.84198838 | 0.48371406 |
| 15                          | 5.68130766 | 8.4962526  | 6.5362737  | 5.49470177 | 13.6517228 | 13.1906513 | 7.14487288 | 5.63898848 | 10.718954  | 12.0807835 | 11.9709014 | 16.5438741 | 9.87807417 | 35.9901483 | 18.028564  | 26.6548297 | 12.9813063 | 11.3449277 | 8.28886462 |
| 16                          | 1.5874795  | 1.27576812 | 1.42642297 | 1.43764586 | 1.47279931 | 1.80855663 | 0.92190009 | 1.23861608 | 1.83225126 | 3.07615343 | 1.30324671 | 1.18716633 | 5.39641136 | 1.53955533 | 4.24563904 | 2.24310192 | 1.99954462 | 1.50617732 | 1.2268804  |
| 17                          | 40.0428444 | 23.3899994 | 1.0746751  | 2.24252925 | 2.4230486  | 4.7524527  | 2.69946907 | 2.37305582 | 3.67137358 | 51.600183  | 18.84275   | 21.7423812 | 8.09191161 | 44.9864175 | 54.1539157 | 49.0110867 | 20.6936309 | 13.4673308 | 20.4520371 |
| 18                          | 2.15397945 | 1.86126212 | 2.39544369 | 2.10032618 | 3.58400509 | 5.2206821  | 3.55326117 | 3.37317697 | 2.16565004 | 2.71483167 | 2.21473056 | 2.23199051 | 1.98365395 | 2.16177916 | 2.54404274 | 3.6016353  | 2.74127817 | 2.3137171  | 0.89902233 |
| 19                          | 7.53556775 | 8.72154462 | 3.06407262 | 2.9514736  | 3.73244039 | 4.07966543 | 1.93377201 | 3.87552029 | 2.99359263 | 10.1846743 | 1.94444366 | 3.00124663 | 3.04447894 | 3.12626191 | 4.81654948 | 3.3967723  | 4.27512978 | 3.26151711 | 2.40988414 |
| 20                          | 4.2004487  | 2.25164412 | 1.01326198 | 0.95877643 | 1.36308212 | 13.0163939 | 1.03959784 | 0.99482182 | 0.26739213 | 4.59053656 | 0.47035037 | 0.21902956 | 0.44565296 | 3.09644998 | 4.69771575 | 4.89977186 | 2.72030788 | 1.20133998 | 3.23408921 |
| 21                          | 13.2825242 | 12.0522423 | 6.40107653 | 6.85692765 | 8.14713188 | 22.9134469 | 72.6382097 | 71.6757371 | 22.9624673 | 60.1808058 | 20.3480235 | 23.396467  | 40.6791298 | 30.5551713 | 45.4567005 | 43.2331139 | 31.2986985 | 23.1794671 | 22.1740453 |
| 22                          | 2.21566951 | 3.37290359 | 1.71077959 | 1.09786628 | 1.25357996 | 1.62587088 | 2.75109458 | 2.99542768 | 1.28867402 | 1.44085225 | 2.85903283 | 1.2350733  | 2.75966151 | 0.98969201 | 0.98929362 | 2.06228681 | 1.9154849  | 1.66832523 | 0.80546538 |
| 23                          | 2.8319664  | 10.5026103 | 1.81345263 | 0.36654149 | 0.50681336 | 0.37963203 | 0.23722167 | 0          | 0.43239458 | 0.25131241 | 0.67860507 | 0          | 0.49607492 | 4.48462549 | 0.73604423 | 0.90060319 | 1.76361861 | 0.59270922 | 2.72510104 |
| 24                          | 12.4475076 | 14.2812754 | 10.8186217 | 9.73140754 | 14.3273244 | 13.4243563 | 9.53069053 | 10.4806359 | 2.9850818  | 6.38269981 | 11.087085  | 14.8761705 | 9.81359242 | 13.8510903 | 12.5490406 | 13.4567565 | 11.2527085 | 11.7672963 | 3.17722941 |
| 25                          | 6.03869558 | 7.92659544 | 29.8761522 | 10.2819766 | 9.68437236 | 35.126194  | 41.4345677 | 40.6996875 | 32.7929488 | 27.1462958 | 47.5944226 | 3.96704119 | 58.566267  | 33.6156818 | 57.9246539 | 3.08154799 | 27.8598188 | 31.3345505 | 18.9699082 |
| 26                          | 10.9499171 | 4.56339378 | 5.53278967 | 6.54522511 | 7.2773884  | 17.1352952 | 14.396296  | 13.6091986 | 5.92851511 | 15.2303152 | 5.70445813 | 3.74718281 | 17.3336455 | 13.8095304 | 9.33465366 | 11.5812476 | 10.1674408 | 10.1422854 | 4.65690288 |
| 27                          | 1.42373991 | 1.18204114 | 3.30680676 | 4.04972189 | 3.16415784 | 6.8946185  | 2.83818309 | 3.81396027 | 1.95795799 | 9.45318317 | 5.61948242 | 10.7259708 | 1.05076658 | 5.43687014 | 5.11000736 | 5.1801449  | 4.4504758  | 3.93184108 | 2.79799929 |
| 28                          | 11.5861363 | 17.0571439 | 15.6704475 | 12.9513937 | 12.2408573 | 25.7725131 | 17.4701983 | 15.6975359 | 14.49912   | 16.6790353 | 22.1579116 | 23.4923682 | 20.3827607 | 27.2984477 | 62.056113  | 41.0354141 | 22.2529623 | 17.2636711 | 12.9302387 |
| 29                          | 6.16608972 | 8.33536899 | 3.0261991  | 2.70547293 | 3.95642406 | 6.14900237 | 4.65933437 | 2.4724366  | 4.26068028 | 3.1964991  | 2.6098027  | 4.10931008 | 2.83993933 | 3.81274967 | 3.92473868 | 9.00867332 | 4.45204508 | 3.94058137 | 1.98933263 |
| 30                          | 21.7825862 | 12.9589591 | 28.0164522 | 19.6763305 | 20.2696832 | 27.2197639 | 23.096228  | 20.5273595 | 23.9290353 | 16.6171776 | 20.5731229 | 28.0238913 | 22.4830062 | 22.3058944 | 31.3838488 | 20.7327151 | 22.4747534 | 22.0442403 | 4.57819168 |
| 31                          | 4.47627958 | 5.09336125 | 24.3724665 | 4.85791054 | 24.2250483 | 4.65796582 | 10.3314624 | 9.89870804 | 6.61996759 | 8.60103803 | 10.0971247 | 11.8484316 | 7.24880362 | 18.6159361 | 22.1786516 | 9.40510526 | 11.4080163 | 9.65190665 | 6.99604413 |
| 32                          | 4.77590013 | 3.86999644 | 8.20701225 | 5.94310465 | 22.6714117 | 4.98968713 | 25.1702655 | 7.25703631 | 5.18082675 | 4.40613088 | 4.33515762 | 7.84908471 | 6.88874757 | 7.11122437 | 6.75839756 | 10.9270172 | 8.52131255 | 6.82357257 | 6.29026105 |
| 33                          | 42.1849828 | 45.9791388 | 34.6693641 | 43.0395741 | 38.7664613 | 35.2092894 | 41.1742246 | 40.4025451 | 40.2518795 | 47.660873  | 81.9714809 | 67.1614972 | 83.2729381 | 81.7220204 | 68.0297956 | 11.5633024 | 50.1912105 | 42.6122784 | 20.3438998 |
| 34                          | 9.48968803 | 5.79767398 | 2.50321279 | 2.10208359 | 2.12097674 | 2.99239738 | 3.33907673 | 3.07842257 | 2.02653908 | 3.49390473 | 2.58663222 | 6.89597791 | 5.22453224 | 4.56639893 | 3.85111067 | 7.07410389 | 4.19642072 | 3.41649073 | 2.16414926 |
