# Supplementary material
Source: Frontiers journal article supplement (https://www.frontiersin.org/articles/318948)
Supplement: Data_Sheet_1.ZIP [file Data_Sheet_1.ZIP]

| Trilobite (tasks: 0-back, stop, rest measurements) |           |          |          |          |          |          |          |          |          |          |          |          |
|----------------------------------------------------|-----------|----------|----------|----------|----------|----------|----------|----------|----------|----------|----------|----------|
| parietal alpha                                     |           |          |          |          |          |          |          |          |          |          |          |          |
| Vp                                                 | Task      | P8       | P4       | Pz       | P3       | P7       | O2       | Oz       | O1       | mean     | median   | std      |
|                                                    | 11 0-back | 10.58146 | 7.466221 | 8.539721 | 11.38605 | 9.377427 | 18.36175 | 6.961489 | 21.07616 | 11.71879 | 9.979445 | 5.201624 |
|                                                    | 12 0-back | 18.05047 | 16.86164 | 19.58545 | 18.72954 | 19.29396 | 17.21442 | 14.34172 | 17.8575  | 17.74184 | 17.95398 | 1.669297 |
|                                                    | 13 0-back | 28.05213 | 17.81215 | 17.32996 | 16.86136 | 16.23485 | 3.951743 | 14.05472 | 16.02855 | 16.29068 | 16.54811 | 6.539693 |
|                                                    | 14 0-back | 31.10345 | 17.20743 | 16.50594 | 17.81347 | 30.05104 | 20.63776 | 15.25056 | 7.986673 | 19.56954 | 17.51045 | 7.698789 |
|                                                    | 15 0-back | 28.51006 | 18.75188 | 16.33971 | 17.32987 | 19.10049 | 35.50987 | 18.95558 | 31.51856 | 23.252   | 19.02803 | 7.416539 |
|                                                    | 16 0-back | 15.26323 | 15.14903 | 15.27638 | 15.39642 | 17.10758 | 18.56561 | 14.96057 | 17.28743 | 16.12578 | 15.3364  | 1.340327 |
|                                                    | 17 0-back | 18.79269 | 16.49292 | 18.01884 | 16.55716 | 10.33737 | 10.36362 | 14.16314 | 15.1422  | 14.98349 | 15.81756 | 3.209494 |
|                                                    | 18 0-back | 27.15692 | 79.62583 | 11.25342 | 39.18704 | 18.64597 | 44.92914 | 26.33773 | 32.68292 | 34.97737 | 29.91992 | 20.97908 |
|                                                    | 19 0-back | 18.85022 | 17.90431 | 18.3909  | 17.51047 | 17.49506 | 13.46868 | 16.93183 | 13.0958  | 16.70591 | 17.50276 | 2.194378 |
|                                                    | 20 0-back | 18.35466 | 17.30034 | 15.49461 | 15.91683 | 17.98982 | 17.55276 | 15.3589  | 22.73026 | 17.58727 | 17.42655 | 2.373064 |
|                                                    | 21 0-back | 17.71919 | 17.03238 | 16.41903 | 17.46667 | 18.17663 | 17.06763 | 14.49663 | 14.74689 | 16.64063 | 17.05001 | 1.35081  |
|                                                    | 22 0-back | 16.89475 | 17.26039 | 15.8238  | 15.71169 | 17.5109  | 27.19195 | 23.07732 | 22.40878 | 19.48495 | 17.38565 | 4.209646 |
|                                                    | 23 0-back | 16.28897 | 15.09095 | 15.95655 | 16.77941 | 16.71291 | 16.60957 | 13.75284 | 12.02365 | 15.40186 | 16.12276 | 1.707041 |
|                                                    | 24 0-back | 16.6172  | 16.31617 | 15.88641 | 17.20612 | 17.32976 | 14.26588 | 14.87584 | 15.79383 | 16.0364  | 16.10129 | 1.070354 |
|                                                    | 25 0-back | 17.01144 | 15.70617 | 17.03528 | 16.98485 | 17.65367 | 12.68463 | 12.03543 | 13.15894 | 15.2838  | 16.34551 | 2.28546  |
|                                                    | 26 0-back | 7.633488 | 18.23589 | 17.11184 | 16.77005 | 23.57501 | 14.38962 | 14.63863 | 18.88087 | 16.40442 | 16.94094 | 4.561411 |
|                                                    | 27 0-back | 15.66463 | 16.08163 | 14.84318 | 15.26084 | 7.835805 | 15.73593 | 4.491276 | 14.84318 | 13.09456 | 15.05201 | 4.391286 |
|                                                    | 28 0-back | 17.0748  | 17.46458 | 17.91223 | 16.81814 | 17.61518 | 17.54119 | 12.90515 | 15.57585 | 16.61339 | 17.26969 | 1.66297  |
|                                                    | 29 0-back | 9.565779 | 15.61534 | 14.11262 | 15.49538 | 11.32456 | 13.63192 | 15.50985 | 14.12806 | 13.67294 | 14.12034 | 2.179588 |
|                                                    | 30 0-back | 10.89204 | 20.6552  | 15.06875 | 18.68948 | 16.81977 | 14.06344 | 15.00072 | 16.82839 | 16.00222 | 15.94426 | 2.975368 |
|                                                    | 31 0-back | 15.58832 | 14.73703 | 15.65478 | 14.4155  | 14.54547 | 15.58942 | 14.73799 | 16.11058 | 15.17239 | 15.16316 | 0.632902 |
|                                                    | 32 0-back | 16.79732 | 15.23982 | 16.91934 | 17.10037 | 11.36697 | 16.78757 | 15.20304 | 16.92979 | 15.79303 | 16.79245 | 1.946124 |
|                                                    | 33 0-back | 12.01345 | 23.42945 | 12.28277 | 17.91123 | 7.413381 | 12.01385 | 16.04911 | 17.8255  | 14.86734 | 14.16594 | 4.946151 |
|                                                    | 34 0-back | 17.57479 | 16.02035 | 17.99991 | 16.85216 | 16.47202 | 16.18901 | 15.74255 | 5.686881 | 15.31721 | 16.33052 | 3.967039 |
|                                                    | 11 stop   | 10.74297 | 9.911485 | 9.571256 | 11.34452 | 2.821297 | 19.45753 | 15.63086 | 22.28199 | 12.72024 | 11.04374 | 6.174678 |
|                                                    | 12 stop   | 5.420646 | 18.49227 | 16.53831 | 16.39297 | 8.262748 | 17.00045 | 14.08929 | 15.26856 | 13.93315 | 15.83076 | 4.620688 |
|                                                    | 13 stop   | 25.8824  | 9.061702 | 14.53298 | 18.23826 | 17.59868 | 17.25953 | 10.43024 | 16.8724  | 16.23452 | 17.06596 | 5.188577 |
|                                                    | 14 stop   | 27.73533 | 17.35062 | 16.90871 | 18.60417 | 25.8035  | 23.2028  | 14.90382 | 16.20037 | 20.08866 | 17.97739 | 4.820238 |
|                                                    | 15 stop   | 19.00419 | 13.33323 | 16.81226 | 14.17662 | 15.22543 | 23.89567 | 16.94139 | 26.53034 | 18.23989 | 16.87683 | 4.701064 |

|                |          |          |          |          |          |          |          |          |          |          |          |
|----------------|----------|----------|----------|----------|----------|----------|----------|----------|----------|----------|----------|
| 16 stop        | 15.60516 | 16.60849 | 15.46683 | 15.74115 | 17.61685 | 20.74992 | 15.95596 | 15.06923 | 16.6017  | 15.84855 | 1.852617 |
| 17 stop        | 19.13714 | 17.98887 | 14.45598 | 18.71705 | 18.24628 | 13.88885 | 14.72393 | 15.95407 | 16.63902 | 16.97147 | 2.118963 |
| 18 stop        | 30.89952 | 54.14552 | 11.26952 | 8.183329 | 20.64204 | 34.48598 | 15.82404 | 34.32295 | 26.22161 | 25.77078 | 15.23035 |
| 19 stop        | 17.82143 | 16.86162 | 17.35358 | 17.93986 | 16.44384 | 13.78839 | 15.77174 | 14.25169 | 16.27902 | 16.65273 | 1.568863 |
| 20 stop        | 19.67777 | 18.31683 | 18.41712 | 18.66369 | 18.49566 | 20.66324 | 15.84562 | 27.35345 | 19.67917 | 18.57967 | 3.389894 |
| 21 stop        | 14.24784 | 15.56759 | 15.14176 | 15.69892 | 16.05109 | 14.9013  | 10.38656 | 17.6186  | 14.95171 | 15.35468 | 2.091931 |
| 22 stop        | 7.147505 | 15.44875 | 19.0942  | 16.64917 | 18.05415 | 30.01909 | 25.76585 | 27.48452 | 19.9579  | 18.57417 | 7.477265 |
| 23 stop        | 15.08106 | 15.17428 | 15.46291 | 15.03683 | 15.20812 | 15.38834 | 16.69239 | 11.2836  | 14.91594 | 15.1912  | 1.561411 |
| 24 stop        | 12.98174 | 13.17381 | 12.58866 | 12.4818  | 14.30052 | 12.70702 | 13.44985 | 14.03144 | 13.21435 | 13.07777 | 0.670194 |
| 25 stop        | 13.242   | 12.57747 | 13.91033 | 11.40483 | 17.14119 | 14.65909 | 12.68872 | 7.63204  | 12.90696 | 12.96536 | 2.734828 |
| 26 stop        | 19.47435 | 17.29859 | 16.40174 | 18.33678 | 25.78316 | 17.46627 | 4.201603 | 18.85524 | 17.22722 | 17.90153 | 6.006493 |
| 27 stop        | 14.71481 | 15.41602 | 14.65817 | 16.27574 | 14.09318 | 14.71481 | 15.91957 | 14.65817 | 15.05631 | 14.71481 | 0.740609 |
| 28 stop        | 20.24428 | 16.31156 | 15.79251 | 16.50342 | 16.45169 | 16.55463 | 12.58562 | 14.78766 | 16.15392 | 16.38163 | 2.133317 |
| 29 stop        | 10.59917 | 15.52467 | 16.30764 | 16.65531 | 0.033179 | 10.63946 | 15.58634 | 16.25923 | 12.70063 | 15.55551 | 5.69141  |
| 30 stop        | 7.068355 | 24.25167 | 17.52458 | 18.1415  | 8.994833 | 4.55614  | 16.26249 | 15.58071 | 14.04753 | 15.9216  | 6.596067 |
| 31 stop        | 17.27004 | 16.94111 | 16.99082 | 15.60934 | 8.680218 | 17.27275 | 16.94892 | 16.97491 | 15.83601 | 16.96192 | 2.939094 |
| 32 stop        | 17.25206 | 16.84674 | 17.72713 | 17.00607 | 7.413383 | 17.24694 | 16.93422 | 17.74103 | 16.02095 | 17.1265  | 3.49418  |
| 33 stop        | 13.09842 | 8.940248 | 17.00167 | 16.4112  | 12.19626 | 13.09361 | 15.1874  | 17.1968  | 14.1407  | 14.14291 | 2.848156 |
| 34 stop        | 16.03001 | 16.64898 | 16.30042 | 18.14533 | 4.860474 | 17.86605 | 17.30639 | 14.35618 | 15.18923 | 16.4747  | 4.339782 |
| 11 eyes opened | 14.77382 | 14.50178 | 14.94045 | 18.19738 | 17.40429 | 20.55635 | 17.49136 | 21.5162  | 17.4227  | 17.44782 | 2.642823 |
| 12 eyes opened | 18.16424 | 14.05216 | 13.67448 | 18.23904 | 22.64288 | 17.25246 | 12.35092 | 16.89791 | 16.65926 | 17.07518 | 3.278521 |
| 13 eyes opened | 25.58726 | 16.92328 | 16.4847  | 16.32882 | 14.37189 | 15.05686 | 15.76189 | 17.62186 | 17.26707 | 16.40676 | 3.515165 |
| 14 eyes opened | 27.50863 | 16.86194 | 15.49977 | 17.15394 | 22.78544 | 19.01818 | 18.57248 | 17.41291 | 19.35166 | 17.9927  | 3.940084 |
| 15 eyes opened | 28.97264 | 16.75701 | 19.1173  | 16.7121  | 25.9021  | 38.35948 | 25.11658 | 43.16857 | 26.76322 | 25.50934 | 9.794697 |
| 16 eyes opened | 12.77343 | 13.2586  | 13.51452 | 14.1459  | 6.509581 | 18.05268 | 10.57383 | 16.94973 | 13.22229 | 13.38656 | 3.59449  |
| 17 eyes opened | 12.51127 | 7.017733 | 14.46257 | 10.52094 | 16.9951  | 12.60507 | 10.50725 | 23.43297 | 13.50661 | 12.55817 | 4.977599 |
| 18 eyes opened | 10.93592 | 60.47372 | 33.17569 | 44.0566  | 25.98666 | 65.04576 | 32.87497 | 65.0782  | 42.20344 | 38.61615 | 19.96936 |
| 19 eyes opened | 16.816   | 17.18728 | 8.285141 | 14.86651 | 15.154   | 13.29339 | 16.43248 | 15.39591 | 14.67884 | 15.27496 | 2.866283 |
| 20 eyes opened | 17.18311 | 16.03011 | 13.59641 | 16.21814 | 17.56355 | 26.07057 | 15.79844 | 29.7964  | 19.03209 | 16.70063 | 5.706126 |
| 21 eyes opened | 15.35114 | 14.79812 | 15.80576 | 14.60688 | 16.63285 | 15.85235 | 14.82462 | 38.97445 | 18.35577 | 15.57845 | 8.358708 |
| 22 eyes opened | 12.77543 | 10.99245 | 14.52664 | 15.8426  | 11.93307 | 7.134674 | 7.676346 | 5.577942 | 10.80739 | 11.46276 | 3.683943 |
| 23 eyes opened | 18.10751 | 20.66637 | 16.16314 | 18.53795 | 18.96899 | 16.9441  | 16.50321 | 20.27033 | 18.2702  | 18.32273 | 1.675416 |
| 24 eyes opened | 16.35733 | 16.55984 | 14.74224 | 15.88636 | 15.88439 | 15.45612 | 15.11999 | 15.85913 | 15.73317 | 15.87176 | 0.605908 |

|                |          |          |          |          |          |          |          |          |          |          |          |
|----------------|----------|----------|----------|----------|----------|----------|----------|----------|----------|----------|----------|
| 25 eyes opened | 11.03137 | 9.676747 | 12.35077 | 10.36515 | 13.20761 | 16.12092 | 4.945146 | 11.43566 | 11.14167 | 11.23351 | 3.201951 |
| 26 eyes opened | 26.59244 | 17.81985 | 15.79925 | 15.42468 | 26.16396 | 26.49835 | 12.60261 | 27.7048  | 21.07574 | 21.9919  | 6.231758 |
| 27 eyes opened | 12.70689 | 11.85452 | 13.79055 | 12.52155 | 8.992963 | 12.72074 | 11.85452 | 13.87601 | 12.28972 | 12.61422 | 1.532027 |
| 28 eyes opened | 14.24278 | 12.91775 | 13.0075  | 13.5176  | 18.64208 | 20.01893 | 9.91235  | 20.6775  | 15.36706 | 13.88019 | 3.901859 |
| 29 eyes opened | 20.23438 | 20.22595 | 17.37281 | 17.67743 | 11.0013  | 20.32279 | 20.22663 | 17.37333 | 18.05433 | 18.95169 | 3.165639 |
| 30 eyes opened | 21.21714 | 33.13559 | 14.68744 | 18.93402 | 20.76221 | 23.89522 | 15.17139 | 26.89052 | 21.83669 | 20.98968 | 6.12892  |
| 31 eyes opened | 17.04618 | 16.20627 | 16.77588 | 18.8243  | 6.984914 | 17.04618 | 16.2032  | 16.77588 | 15.73285 | 16.77588 | 3.628346 |
| 32 eyes opened | 15.31258 | 15.97783 | 15.77698 | 16.83123 | 13.13636 | 15.20244 | 15.97783 | 15.78357 | 15.49985 | 15.78028 | 1.075466 |
| 33 eyes opened | 13.42741 | 16.91318 | 17.04731 | 17.50516 | 6.984914 | 13.42741 | 16.91318 | 17.04731 | 14.90824 | 16.91318 | 3.607524 |
| 34 eyes opened | 17.48627 | 17.04847 | 18.09477 | 16.30246 | 17.44072 | 17.3546  | 16.03401 | 22.19852 | 17.74498 | 17.39766 | 1.918394 |
| 11 eyes closed | 7.719789 | 30.74681 | 15.87514 | 18.1328  | 31.74161 | 41.36453 | 39.04978 | 41.01754 | 28.206   | 31.24421 | 12.80084 |
| 12 eyes closed | 10.08061 | 11.82939 | 11.63884 | 11.04174 | 10.87299 | 9.787739 | 10.55475 | 10.49339 | 10.78743 | 10.71387 | 0.709341 |
| 13 eyes closed | 22.92588 | 14.69361 | 16.08347 | 16.51485 | 16.16896 | 16.08065 | 16.56848 | 16.8665  | 16.9878  | 16.34191 | 2.485663 |
| 14 eyes closed | 38.02656 | 16.0401  | 14.83815 | 16.0471  | 23.79563 | 16.15043 | 16.36541 | 20.49678 | 20.22002 | 16.25792 | 7.793803 |
| 15 eyes closed | 55.2888  | 18.09522 | 17.49234 | 18.24021 | 50.82291 | 60.56007 | 42.97995 | 71.55178 | 41.87891 | 46.90143 | 21.41313 |
| 16 eyes closed | 18.36895 | 17.33103 | 16.01484 | 16.5644  | 10.30182 | 50.44987 | 12.31318 | 29.17396 | 21.31476 | 16.94771 | 13.0282  |
| 17 eyes closed | 20.0305  | 9.381572 | 14.85853 | 14.6927  | 23.5252  | 15.49069 | 13.43449 | 14.7245  | 15.76727 | 14.79152 | 4.271567 |
| 18 eyes closed | 13.07809 | 6.121331 | 13.71825 | 10.19599 | 26.33538 | 71.3734  | 38.28014 | 69.49822 | 31.0751  | 20.02682 | 26.34509 |
| 19 eyes closed | 14.93179 | 14.9038  | 13.61552 | 13.85951 | 17.13755 | 22.36248 | 16.12208 | 23.08111 | 17.00173 | 15.52693 | 3.713193 |
| 20 eyes closed | 17.70232 | 16.55427 | 15.92561 | 18.12069 | 17.0573  | 55.2736  | 14.53386 | 51.51039 | 25.83475 | 17.37981 | 17.07379 |
| 21 eyes closed | 16.85779 | 16.84823 | 16.84019 | 16.89295 | 18.11016 | 9.306819 | 13.73595 | 10.14024 | 14.84154 | 16.84421 | 3.400346 |
| 22 eyes closed | 18.21573 | 13.54772 | 14.8848  | 20.44065 | 16.75329 | 12.99457 | 19.22461 | 9.459585 | 15.69012 | 15.81904 | 3.66242  |
| 23 eyes closed | 16.6689  | 16.09993 | 13.56635 | 15.05499 | 14.55799 | 20.46692 | 13.86148 | 37.14757 | 18.42802 | 15.57746 | 7.873435 |
| 24 eyes closed | 14.2188  | 14.18986 | 14.94432 | 14.84686 | 13.78566 | 14.2439  | 13.13666 | 12.85646 | 14.02781 | 14.20433 | 0.74115  |
| 25 eyes closed | 13.33095 | 11.35588 | 11.24534 | 9.968089 | 10.9836  | 34.58468 | 13.50798 | 42.13061 | 18.38839 | 12.34341 | 12.54489 |
| 26 eyes closed | 30.96431 | 12.36549 | 12.30087 | 13.11761 | 27.77723 | 26.04748 | 13.92245 | 25.09467 | 20.19876 | 19.50856 | 7.971193 |
| 27 eyes closed | 14.47355 | 14.10588 | 15.68689 | 12.92843 | 9.800297 | 14.47355 | 14.10588 | 15.68773 | 13.90778 | 14.28972 | 1.885383 |
| 28 eyes closed | 18.063   | 14.60769 | 15.16278 | 15.62762 | 14.77373 | 14.82456 | 13.46084 | 50.88307 | 19.67541 | 14.99367 | 12.67802 |
| 29 eyes closed | 14.20438 | 13.69832 | 7.921673 | 14.03668 | 6.840679 | 14.1072  | 13.69832 | 7.915922 | 11.5529  | 13.69832 | 3.328408 |
| 30 eyes closed | 5.449912 | 17.63696 | 14.43664 | 16.63666 | 22.80856 | 11.80117 | 13.73825 | 19.68112 | 15.27366 | 15.53665 | 5.281581 |
| 31 eyes closed | 19.26066 | 19.16986 | 16.08749 | 20.28031 | 6.984914 | 19.26066 | 20.8876  | 16.08749 | 17.25237 | 19.21526 | 4.508105 |
| 32 eyes closed | 17.10004 | 17.83151 | 17.58042 | 17.80005 | 8.993957 | 17.10363 | 17.83151 | 17.56598 | 16.47589 | 17.5732  | 3.037857 |
| 33 eyes closed | 16.29007 | 17.51763 | 17.32014 | 18.05625 | 12.78182 | 16.2972  | 17.49356 | 17.31778 | 16.63431 | 17.31896 | 1.67126  |

34 eyes closed      17.1085   17.07048   16.37918   17.15041   18.06348   18.3287   15.99356   23.55651   17.95635   17.12946   2.390608
