# Supplementary material
Source: Frontiers journal article supplement (https://www.frontiersin.org/articles/318948)
Supplement: Data_Sheet_1.ZIP [file Data_Sheet_1.ZIP]

| Jellyfish (all tasks) |             |             |             |             |             |             |            |
|-----------------------|-------------|-------------|-------------|-------------|-------------|-------------|------------|
| SNR [dB]              |             |             |             |             |             |             |            |
| Vp                    | AF8         | Fp2         | Fp1         | AF7         | mean        | median      | std        |
| 11                    | -21.3693047 | -24.9136009 | -24.9284611 | -23.1751404 | -23.5966268 | -24.0443707 | 1.69772574 |
| 12                    | -8.2053318  | -8.87749958 | -8.22952652 | -8.71175289 | -8.5060277  | -8.47063971 | 0.34018874 |
| 13                    | -25.8307114 | -26.3821316 | -25.3563786 | -23.2111168 | -25.1950846 | -25.593545  | 1.38747323 |
| 14                    | 3.20372462  | 1.85142219  | 1.10532498  | 5.78835106  | 2.98720571  | 2.52757341  | 2.05951248 |
| 15                    | -21.7294865 | -8.3134079  | -21.648037  | -19.5715523 | -17.8156209 | -20.6097946 | 6.41303629 |
| 16                    | -15.7193336 | -14.1019945 | -14.6384621 | -28.9997482 | -18.3648846 | -15.1788979 | 7.12174419 |
| 17                    | -29.7313633 | -32.7218819 | -27.8522396 | -30.847744  | -30.2883072 | -30.2895536 | 2.03959694 |
| 18                    | -10.6748714 | -8.95714188 | -11.7741919 | -9.40203953 | -10.2020612 | -10.0384555 | 1.27606206 |
| 19                    | -1.11174512 | -1.51312375 | -14.8151264 | -1.40396941 | -4.71099117 | -1.45854658 | 6.73822109 |
| 20                    | -5.11766148 | 15.857626   | -4.0299902  | -4.2205019  | 0.6223681   | -4.12524605 | 10.1679046 |
| 21                    | -24.5206318 | -9.16891193 | -12.9255934 | -24.2030678 | -17.7045512 | -18.5643306 | 7.83975442 |
| 22                    | -33.2319946 | -10.0209808 | -3.48462963 | -30.8491421 | -19.3966868 | -20.4350615 | 14.8735997 |
| 23                    | -19.8077488 | -7.04390764 | -12.5379915 | -19.3995991 | -14.6973118 | -15.9687953 | 6.09549919 |
| 24                    | -18.602993  | -20.897543  | -23.3006516 | -31.0624008 | -23.4658971 | -22.0990973 | 5.41536253 |
| 25                    | -22.934433  | -3.19864964 | -6.43013668 | -40.8264465 | -18.3474165 | -14.6822848 | 17.2998479 |
| 26                    | -10.123826  | -8.8388319  | -10.4693298 | -10.0035524 | -9.85888505 | -10.0636892 | 0.70811337 |
| 27                    | -7.32375288 | -5.23224735 | -6.78442764 | -6.68643999 | -6.50671697 | -6.73543382 | 0.89465898 |
| 28                    | -19.1730919 | -28.2143726 | 6.90544271  | -12.8042459 | -13.3215669 | -15.9886689 | 14.8933491 |
| 29                    | -10.0233555 | -10.3910227 | -6.80212927 | -11.1770668 | -9.59839356 | -10.2071891 | 1.92528411 |
| 30                    | -7.34264183 | -6.85062551 | -18.3771954 | -7.19360352 | -9.94101655 | -7.26812267 | 5.62789064 |
| 31                    | -36.4749031 | -13.5553284 | -11.8309212 | -14.0514526 | -18.9781513 | -13.8033905 | 11.7032558 |
| 32                    | -24.3369942 | -10.7541561 | -16.2505531 | -20.9370747 | -18.0696945 | -18.5938139 | 5.89709791 |
| 33                    | -34.9257927 | -23.8750401 | 3.21181107  | -17.150507  | -18.1848822 | -20.5127735 | 16.0366704 |
| 34                    | -18.8198051 | 11.6658716  | -15.526103  | 5.36269474  | -4.32933545 | -5.08170414 | 15.1120638 |
