# Supplementary material
Source: Frontiers journal article supplement (https://www.frontiersin.org/articles/318948)
Supplement: Data_Sheet_1.ZIP [file Data_Sheet_1.ZIP]

**BR8+ (tasks: 0-back, stop)****frontal theta**

| Vp | Task      | Fp1      | Fp2      | Fz       | mean     | median   | std      |
|----|-----------|----------|----------|----------|----------|----------|----------|
|    | 11 0-back | 8.661286 | 6.15209  | 6.144833 | 6.98607  | 6.15209  | 1.450785 |
|    | 12 0-back | 11.15922 | 11.00413 | 0        | 7.387784 | 11.00413 | 6.398478 |
|    | 13 0-back | 0.84871  | 0.006428 | 7.56282  | 2.805986 | 0.84871  | 4.14101  |
|    | 14 0-back | 7.09405  | 7.285775 | 6.424192 | 6.934672 | 7.09405  | 0.452363 |
|    | 15 0-back | 1.565311 | 24.51579 | 11.77116 | 12.61742 | 11.77116 | 11.49862 |
|    | 16 0-back | 4.108807 | 11.5605  | 4.975465 | 6.881592 | 4.975465 | 4.075161 |
|    | 17 0-back | 6.281383 | 6.45643  | 5.222031 | 5.986615 | 6.281383 | 0.667908 |
|    | 18 0-back | 7.571061 | 11.06575 | 10.95603 | 9.864278 | 10.95603 | 1.986742 |
|    | 19 0-back | 1.768671 | 6.285734 | 7.453459 | 5.169288 | 6.285734 | 3.002339 |
|    | 20 0-back | 6.000016 | 16.37353 | 11.64218 | 11.33857 | 11.64218 | 5.193415 |
|    | 21 0-back | 0        | 0        | 6.208661 | 2.069554 | 0        | 3.584572 |
|    | 22 0-back | 10.43521 | 11.33435 | 7.22021  | 9.663257 | 10.43521 | 2.162978 |
|    | 23 0-back | 6.289776 | 5.683516 | 2.911953 | 4.961748 | 5.683516 | 1.80087  |
|    | 24 0-back | 17.99704 | 3.182381 | 5.834904 | 9.004775 | 5.834904 | 7.899658 |
|    | 25 0-back | 6.372045 | 5.778161 | 4.741572 | 5.630593 | 5.778161 | 0.825193 |
|    | 26 0-back | 0        | 5.649269 | 3.76347  | 3.13758  | 3.76347  | 2.876172 |
|    | 27 0-back | 10.11379 | 9.77454  | 8.50263  | 9.463654 | 9.77454  | 0.849381 |
|    | 28 0-back | 10.76428 | 8.292395 | 8.167906 | 9.074861 | 8.292395 | 1.464405 |
|    | 29 0-back | 15.79977 | 17.81514 | 9.125572 | 14.24683 | 15.79977 | 4.548171 |
|    | 30 0-back | 22.71754 | 5.54397  | 5.502812 | 11.25477 | 5.54397  | 9.927068 |
|    | 31 0-back | 19.22481 | 22.02338 | 8.670753 | 16.63965 | 19.22481 | 7.041694 |
|    | 32 0-back | 7.582947 | 7.231241 | 6.782363 | 7.198851 | 7.231241 | 0.401273 |
|    | 33 0-back | 8.836687 | 9.846512 | 4.18463  | 7.62261  | 8.836687 | 3.019887 |
|    | 34 0-back | 2.233743 | 0.547749 | 5.670915 | 2.817469 | 2.233743 | 2.610988 |
|    | 11 stop   | 7.098184 | 6.584348 | 4.838451 | 6.173661 | 6.584348 | 1.184524 |
|    | 12 stop   | 26.63998 | 23.74798 | 8.574155 | 19.65404 | 23.74798 | 9.703802 |
|    | 13 stop   | 0        | 0.941956 | 6.261826 | 2.401261 | 0.941956 | 3.376358 |
|    | 14 stop   | 27.04712 | 21.08226 | 12.58494 | 20.23811 | 21.08226 | 7.267951 |
|    | 15 stop   | 0        | 36.31665 | 20.03773 | 18.78479 | 20.03773 | 18.19072 |

|         |          |          |          |          |          |          |
|---------|----------|----------|----------|----------|----------|----------|
| 16 stop | 6.537101 | 9.580838 | 7.336664 | 7.818201 | 7.336664 | 1.577971 |
| 17 stop | 5.14868  | 6.948124 | 3.125524 | 5.074109 | 5.14868  | 1.912391 |
| 18 stop | 8.696586 | 36.01934 | 17.33327 | 20.68307 | 17.33327 | 13.966   |
| 19 stop | 2.933752 | 6.288687 | 5.43752  | 4.886653 | 5.43752  | 1.743986 |
| 20 stop | 22.95014 | 16.06399 | 10.67545 | 16.56319 | 16.06399 | 6.15255  |
| 21 stop | 0        | 0.313751 | 7.5568   | 2.623517 | 0.313751 | 4.275227 |
| 22 stop | 14.82254 | 14.3825  | 7.244868 | 12.14997 | 14.3825  | 4.253638 |
| 23 stop | 11.76399 | 11.50242 | 8.062431 | 10.44295 | 11.50242 | 2.065731 |
| 24 stop | 26.35101 | 7.650401 | 9.401173 | 14.46753 | 9.401173 | 10.32856 |
| 25 stop | 10.23258 | 19.49934 | 8.837587 | 12.8565  | 10.23258 | 5.794995 |
| 26 stop | 0        | 10.61787 | 6.683014 | 5.766962 | 6.683014 | 5.367882 |
| 27 stop | 8.579897 | 17.62093 | 7.574686 | 11.2585  | 8.579897 | 5.532897 |
| 28 stop | 23.80553 | 18.67832 | 11.22912 | 17.90432 | 18.67832 | 6.323833 |
| 29 stop | 0        | 16.34756 | 9.373195 | 8.573586 | 9.373195 | 8.203063 |
| 30 stop | 2.355161 | 1.411279 | 3.882243 | 2.549561 | 2.355161 | 1.2469   |
| 31 stop | 14.44615 | 24.97351 | 0        | 13.13989 | 14.44615 | 12.53789 |
| 32 stop | 4.428242 | 8.452015 | 6.291191 | 6.390483 | 6.291191 | 2.013723 |
| 33 stop | 26.04329 | 15.67861 | 0.402791 | 14.04156 | 15.67861 | 12.8984  |
| 34 stop | 0.061005 | 0.10298  | 5.475959 | 1.879981 | 0.10298  | 3.114279 |
