# Supplementary material
Source: Frontiers journal article supplement (https://www.frontiersin.org/articles/318948)
Supplement: Data_Sheet_1.ZIP [file Data_Sheet_1.ZIP]

# BR8+ (tasks: 0-back, stop, rest measurements)

## parietal alpha

| Vp | Task      | Pz       | O1       | O2       | mean     | median   | std      |
|----|-----------|----------|----------|----------|----------|----------|----------|
|    | 11 0-back | 7.533984 | 4.368188 | 5.45433  | 5.785501 | 5.45433  | 1.608671 |
|    | 12 0-back | 0        | 2.020098 | 2.012321 | 1.344139 | 2.012321 | 1.164065 |
|    | 13 0-back | 0.366556 | 2.56953  | 1.808111 | 1.581399 | 1.808111 | 1.118848 |
|    | 14 0-back | 0        | 3.794569 | 2.931919 | 2.242163 | 2.931919 | 1.989098 |
|    | 15 0-back | 0.63294  | 3.167427 | 1.968936 | 1.923101 | 1.968936 | 1.267865 |
|    | 16 0-back | 0        | 0        | 0        | 0        | 0        | 0        |
|    | 17 0-back | 6.22633  | 6.489813 | 5.225336 | 5.980493 | 6.22633  | 0.667123 |
|    | 18 0-back | 0        | 4.009288 | 3.721108 | 2.576799 | 3.721108 | 2.23622  |
|    | 19 0-back | 0        | 7.694441 | 7.299031 | 4.997824 | 7.299031 | 4.332756 |
|    | 20 0-back | 9.05228  | 7.866715 | 6.784051 | 7.901015 | 7.866715 | 1.134503 |
|    | 21 0-back | 4.048635 | 5.126642 | 5.587437 | 4.920905 | 5.126642 | 0.789762 |
|    | 22 0-back | 10.35598 | 8.556667 | 6.966168 | 8.626273 | 8.556667 | 1.695979 |
|    | 23 0-back | 7.919462 | 8.832739 | 9.381913 | 8.711371 | 8.832739 | 0.738741 |
|    | 24 0-back | 0        | 0        | 0        | 0        | 0        | 0        |
|    | 25 0-back | 0        | 0        | 0        | 0        | 0        | 0        |
|    | 26 0-back | 2.313644 | 3.043202 | 3.540807 | 2.965885 | 3.043202 | 0.617224 |
|    | 27 0-back | 1.944997 | 0        | 0        | 0.648332 | 0        | 1.122944 |
|    | 28 0-back | 0        | 6.494338 | 5.940756 | 4.145031 | 5.940756 | 3.600358 |
|    | 29 0-back | 16.02567 | 18.47928 | 9.178197 | 14.56105 | 16.02567 | 4.820412 |
|    | 30 0-back | 20.02958 | 5.685773 | 5.25497  | 10.32344 | 5.685773 | 8.408525 |
|    | 31 0-back | 10.64987 | 14.06105 | 8.670753 | 11.12722 | 10.64987 | 2.726669 |
|    | 32 0-back | 11.25945 | 16.87335 | 12.74551 | 13.62611 | 12.74551 | 2.908702 |
|    | 33 0-back | 15.37767 | 13.66931 | 4.255882 | 11.10095 | 13.66931 | 5.989232 |
|    | 34 0-back | 0.012168 | 2.343295 | 0.083523 | 0.812995 | 0.083523 | 1.325758 |
|    | 11 stop   | 2.161916 | 4.213079 | 3.61843  | 3.331142 | 3.61843  | 1.055329 |
|    | 12 stop   | 8.949679 | 1.951455 | 1.663623 | 4.188252 | 1.951455 | 4.126027 |
|    | 13 stop   | 0        | 2.580193 | 2.35194  | 1.644045 | 2.35194  | 1.428351 |
|    | 14 stop   | 0        | 4.339996 | 0        | 1.446665 | 0        | 2.505698 |
|    | 15 stop   | 0        | 3.166293 | 2.196263 | 1.787519 | 2.196263 | 1.622238 |

|                |          |          |          |          |          |          |
|----------------|----------|----------|----------|----------|----------|----------|
| 16 stop        | 0        | 0        | 0        | 0        | 0        | 0        |
| 17 stop        | 11.63868 | 12.32023 | 3.079771 | 9.012896 | 11.63868 | 5.149525 |
| 18 stop        | 0.576256 | 4.266437 | 4.091068 | 2.977921 | 4.091068 | 2.08175  |
| 19 stop        | 11.02898 | 5.618286 | 5.418176 | 7.355146 | 5.618286 | 3.183203 |
| 20 stop        | 7.683901 | 6.698493 | 7.721481 | 7.367958 | 7.683901 | 0.580078 |
| 21 stop        | 3.946515 | 3.972473 | 5.296154 | 4.405047 | 3.972473 | 0.77183  |
| 22 stop        | 14.51493 | 14.78083 | 9.278776 | 12.85818 | 14.51493 | 3.102704 |
| 23 stop        | 0        | 0        | 0        | 0        | 0        | 0        |
| 24 stop        | 8.257983 | 8.959879 | 9.074533 | 8.764132 | 8.959879 | 0.442071 |
| 25 stop        | 0        | 0        | 0        | 0        | 0        | 0        |
| 26 stop        | 2.681558 | 3.001948 | 2.705736 | 2.796414 | 2.705736 | 0.178408 |
| 27 stop        | 0        | 1.604582 | 2.469652 | 1.358078 | 1.604582 | 1.253143 |
| 28 stop        | 2.450158 | 5.104098 | 4.20704  | 3.920432 | 4.20704  | 1.349984 |
| 29 stop        | 0        | 16.52146 | 8.790138 | 8.4372   | 8.790138 | 8.266383 |
| 30 stop        | 9.954562 | 8.980838 | 8.996175 | 9.310525 | 8.996175 | 0.557805 |
| 31 stop        | 19.98952 | 7.962556 | 0        | 9.31736  | 7.962556 | 10.06339 |
| 32 stop        | 0        | 0        | 0        | 0        | 0        | 0        |
| 33 stop        | 13.38261 | 17.86881 | 0.402791 | 10.55141 | 13.38261 | 9.070683 |
| 34 stop        | 0.321756 | 0        | 5.286524 | 1.869427 | 0.321756 | 2.963663 |
| 11 eyes opened | 0.710338 | 4.215512 | 2.951474 | 2.625775 | 2.951474 | 1.77514  |
| 12 eyes opened | 2.205459 | 2.74379  | 1.888063 | 2.279104 | 2.205459 | 0.432591 |
| 13 eyes opened | 1.239718 | 0.723839 | 1.319875 | 1.094477 | 1.239718 | 0.323475 |
| 14 eyes opened | 0        | 3.250486 | 2.4154   | 1.888629 | 2.4154   | 1.688055 |
| 15 eyes opened | 0.693017 | 3.097574 | 2.306542 | 2.032378 | 2.306542 | 1.225499 |
| 16 eyes opened | 0        | 0        | 0        | 0        | 0        | 0        |
| 17 eyes opened | 0        | 1.192856 | 2.435655 | 1.209503 | 1.192856 | 1.217913 |
| 18 eyes opened | 0        | 3.220171 | 4.54506  | 2.58841  | 3.220171 | 2.337463 |
| 19 eyes opened | 0        | 4.931306 | 5.575199 | 3.502169 | 4.931306 | 3.050006 |
| 20 eyes opened | 14.56406 | 9.219556 | 9.311878 | 11.03183 | 9.311878 | 3.059346 |
| 21 eyes opened | 4.078873 | 4.468655 | 4.082552 | 4.210027 | 4.082552 | 0.223986 |
| 22 eyes opened | 9.915216 | 2.783431 | 2.306561 | 5.001736 | 2.783431 | 4.261874 |
| 23 eyes opened | 0.968676 | 0.693079 | 1.013237 | 0.891664 | 0.968676 | 0.173417 |
| 24 eyes opened | 0        | 1.846663 | 1.886947 | 1.244537 | 1.846663 | 1.077989 |

|                |          |          |          |          |          |          |
|----------------|----------|----------|----------|----------|----------|----------|
| 25 eyes opened | 0        | 2.631746 | 2.790147 | 1.807298 | 2.631746 | 1.567168 |
| 26 eyes opened | 8.579395 | 3.717617 | 4.95452  | 5.750511 | 4.95452  | 2.526741 |
| 27 eyes opened | 0        | 1.567661 | 1.79565  | 1.121104 | 1.567661 | 0.977574 |
| 28 eyes opened | 2.094442 | 3.68887  | 1.836848 | 2.540053 | 2.094442 | 1.003207 |
| 29 eyes opened | 4.889597 | 6.622716 | 5.645745 | 5.719352 | 5.645745 | 0.868901 |
| 30 eyes opened | 6.392334 | 7.980219 | 2.347206 | 5.573253 | 6.392334 | 2.904458 |
| 31 eyes opened | 9.302623 | 8.563915 | 1.643948 | 6.503495 | 8.563915 | 4.224668 |
| 32 eyes opened | 2.436192 | 1.202285 | 3.333215 | 2.323897 | 2.436192 | 1.069894 |
| 33 eyes opened | 18.68859 | 13.5114  | 4.044884 | 12.08162 | 13.5114  | 7.425813 |
| 34 eyes opened | 11.54408 | 1.936146 | 8.928187 | 7.46947  | 8.928187 | 4.96729  |
| 11 eyes closed | 0.44819  | 2.589007 | 1.965662 | 1.66762  | 1.965662 | 1.101089 |
| 12 eyes closed | 2.139495 | 3.123921 | 2.387694 | 2.55037  | 2.387694 | 0.511978 |
| 13 eyes closed | 1.770364 | 0.715223 | 1.492079 | 1.325889 | 1.492079 | 0.54685  |
| 14 eyes closed | 1.420251 | 2.190396 | 2.548971 | 2.053206 | 2.190396 | 0.576731 |
| 15 eyes closed | 3.495946 | 4.868221 | 4.808992 | 4.391053 | 4.808992 | 0.775751 |
| 16 eyes closed | 0        | 0        | 0        | 0        | 0        | 0        |
| 17 eyes closed | 5.504809 | 4.251536 | 4.174405 | 4.643583 | 4.251536 | 0.746839 |
| 18 eyes closed | 0        | 3.174843 | 2.181381 | 1.785408 | 2.181381 | 1.624039 |
| 19 eyes closed | 0        | 4.629465 | 4.875305 | 3.168256 | 4.629465 | 2.746543 |
| 20 eyes closed | 6.461252 | 5.591016 | 5.49206  | 5.84811  | 5.591016 | 0.533297 |
| 21 eyes closed | 6.353014 | 6.336035 | 8.536756 | 7.075268 | 6.353014 | 1.265714 |
| 22 eyes closed | 3.961919 | 4.930517 | 3.625865 | 4.172767 | 3.961919 | 0.677401 |
| 23 eyes closed | 0        | 0        | 0        | 0        | 0        | 0        |
| 24 eyes closed | 0        | 0        | 0        | 0        | 0        | 0        |
| 25 eyes closed | 0        | 1.445816 | 1.82176  | 1.089192 | 1.445816 | 0.961815 |
| 26 eyes closed | 3.974537 | 3.809717 | 3.785057 | 3.856437 | 3.809717 | 0.103018 |
| 27 eyes closed | 0        | 0.999817 | 1.105372 | 0.701729 | 0.999817 | 0.610003 |
| 28 eyes closed | 2.531732 | 2.931465 | 1.896751 | 2.453316 | 2.531732 | 0.521795 |
| 29 eyes closed | 0        | 3.843437 | 5.53805  | 3.127162 | 3.843437 | 2.837655 |
| 30 eyes closed | 0        | 0        | 0        | 0        | 0        | 0        |
| 31 eyes closed | 11.5593  | 11.63917 | 0        | 7.732822 | 11.5593  | 6.69694  |
| 32 eyes closed | 1.013371 | 1.902009 | 2.00979  | 1.641723 | 1.902009 | 0.546831 |
| 33 eyes closed | 4.475255 | 4.121362 | 2.933262 | 3.843293 | 4.121362 | 0.80773  |

34 eyes closed

0 2.810962

0 0.936987

0 1.622909
