# Supplementary material
Source: Frontiers journal article supplement (https://www.frontiersin.org/articles/318948)
Supplement: Data_Sheet_1.ZIP [file Data_Sheet_1.ZIP]

|    |            |            | Trilobite (all tasks)       |            |            |            |            |            |            |            |            |            |            |            |            |            |            |            |            |            |            |            |            |            |            |            |            |            |            |            |            |            |            |            |            |            |            |            |            |            |            |            |            |            |            |            |            |            |    |
|----|------------|------------|-----------------------------|------------|------------|------------|------------|------------|------------|------------|------------|------------|------------|------------|------------|------------|------------|------------|------------|------------|------------|------------|------------|------------|------------|------------|------------|------------|------------|------------|------------|------------|------------|------------|------------|------------|------------|------------|------------|------------|------------|------------|------------|------------|------------|------------|------------|------------|----|
|    |            |            | Proportion of artifacts [%] |            |            |            |            |            |            |            |            |            |            |            |            |            |            |            |            |            |            |            |            |            |            |            |            |            |            |            |            |            |            |            |            |            |            |            |            |            |            |            |            |            |            |            |            |            |    |
| Vp | Fp2        | Fp1        | AF4                         | AF3        | F8         | F4         | F5         | F3         | F7         | FT8        | FC4        | FC2        | FC1        | FT7        | T8         | C4         | C3         | T7         | CP8        | CP2        | CP3        | TP7        | TP8        | P8         | PA         | P2         | P3         | P7         | O2         | O3         | O1         | mean       | median     | std        |            |            |            |            |            |            |            |            |            |            |            |            |            |            |    |
| 11 | 38.37885   | 39.08177   | 35.5101341                  | 32.0761528 | 67.9598996 | 18.659651  | 23.1096835 | 19.1850124 | 49.9517377 | 35.6951721 | 18.2300366 | 35.3553712 | 18.6917177 | 61.2011343 | 34.1974548 | 39.3589694 | 38.37885   | 39.08177   | 35.5101341 | 32.0761528 | 67.9598996 | 18.659651  | 23.1096835 | 19.1850124 | 49.9517377 | 35.6951721 | 18.2300366 | 35.3553712 | 18.6917177 | 61.2011343 | 34.1974548 | 39.3589694 | 35.412611  | 35.4327527 | 14.4941429 |            |            |            |            |            |            |            |            |            |            |            |            |            |    |
| 12 | 83.8350439 | 83.4163382 | 80.5226763                  | 80.3789751 | 80.4476316 | 80.5652895 | 87.7064322 | 80.4005469 | 79.3287073 | 80.8260232 | 80.4290128 | 80.4962903 | 80.3444475 | 80.4445546 | 80.5978422 | 80.9235325 | 80.8350439 | 83.4163382 | 80.5226763 | 80.3789751 | 80.4476316 | 80.5652895 | 87.7064322 | 80.4005469 | 79.3287073 | 80.8260232 | 80.4290128 | 80.4962903 | 80.3444475 | 80.4445546 | 80.5978422 | 80.9235325 | 81.2913216 | 80.5094833 | 2.02043108 |            |            |            |            |            |            |            |            |            |            |            |            |            |    |
| 13 | 68.1791811 | 69.0624049 | 66.3517345                  | 67.3963098 | 6.13228309 | 6.06785493 | 13.244892  | 11.593324  | 6.99784514 | 67.7838312 | 5.29933003 | 5.33641991 | 7.39733428 | 5.38847979 | 75.0025904 | 5.63056191 | 68.1791811 | 69.0624049 | 66.3517345 | 67.3963098 | 6.13228309 | 6.06785493 | 13.244892  | 11.593324  | 6.99784514 | 67.7838312 | 5.29933003 | 5.33641991 | 7.39733428 | 5.38847979 | 75.0025904 | 5.63056191 | 30.4290236 | 8.49532915 | 30.4520094 |            |            |            |            |            |            |            |            |            |            |            |            |            |    |
| 14 | 62.8546959 | 61.2581834 | 7.18190736                  | 8.23704193 | 5.7549288  | 5.83988324 | 6.27873848 | 5.95279303 | 9.22529733 | 13.1210065 | 5.98841439 | 5.88266136 | 6.88329    | 10.3447288 | 7.01009526 | 6.15079448 | 62.8546959 | 63.2581834 | 7.18190736 | 8.23704193 | 5.7549288  | 5.83988324 | 6.27873848 | 5.95279303 | 9.22529733 | 13.1210065 | 5.98841439 | 5.88266136 | 6.88329    | 10.3447288 | 7.01009526 | 6.15079448 | 14.3727788 | 6.94669263 | 18.789244  |            |            |            |            |            |            |            |            |            |            |            |            |            |    |
| 15 | 54.7442676 | 54.716562  | 53.8051785                  | 55.5659641 | 55.6465292 | 53.3830803 | 59.5353679 | 53.5877596 | 57.1204017 | 55.1118855 | 58.7124376 | 53.6002084 | 53.7455956 | 54.8585558 | 54.8067448 | 54.7589948 | 54.7442676 | 54.716562  | 53.8051785 | 55.5659641 | 55.6465292 | 53.3830803 | 59.5353679 | 53.5877596 | 57.1204017 | 55.1118855 | 58.7124376 | 53.6002084 | 53.7455956 | 54.8585558 | 54.8067448 | 54.7589948 | 54.9243458 | 54.7516312 | 1.54280303 |            |            |            |            |            |            |            |            |            |            |            |            |            |    |
| 16 | 71.8638697 | 71.7666815 | 27.9516604                  | 27.4756009 | 99.71939   | 59.6471044 | 65.6043524 | 27.9168643 | 26.6885131 | 29.0832057 | 26.5317248 | 26.5500641 | 26.4512109 | 26.5025088 | 26.7406536 | 26.5392777 | 71.8638697 | 71.7666815 | 27.9516604 | 27.4756009 | 99.71939   | 59.6471044 | 65.6043524 | 27.9168643 | 26.6885131 | 29.0832057 | 26.5317248 | 26.5500641 | 26.4512109 | 26.5025088 | 26.7406536 | 26.5392777 | 47.6886298 | 27.6862326 | 23.3025559 |            |            |            |            |            |            |            |            |            |            |            |            |            |    |
| 17 | 39.96187   | 30.1167635 | 29.1218277                  | 28.9773604 | 29.2375835 | 28.85725   | 42.3286268 | 28.8500289 | 29.3517639 | 34.9124951 | 29.0421498 | 29.3260178 | 29.1534656 | 31.5689915 | 29.2992472 | 29.4792279 | 39.96187   | 30.1167635 | 29.1218277 | 28.9773604 | 29.2375835 | 28.85725   | 42.3286268 | 28.8500289 | 29.3517639 | 34.9124951 | 29.0421498 | 29.3260178 | 29.1534656 | 31.5689915 | 29.2992472 | 29.4792279 | 31.2240981 | 29.3216325 | 4.1126667  |            |            |            |            |            |            |            |            |            |            |            |            |            |    |
| 18 | 84.7098555 | 84.4573596 | 84.7249047                  | 84.3849662 | 85.5567274 | 99.8537721 | 133.472601 | 98.3929426 | 85.0247626 | 85.6178445 | 98.8279443 | 85.5380051 | 90.3604102 | 85.9883597 | 83.7962729 | 84.7202706 | 84.7098555 | 84.4573596 | 84.7249047 | 84.3849662 | 85.5567274 | 99.8537721 | 133.472601 | 98.3929426 | 85.0247626 | 85.6178445 | 98.8279443 | 85.5380051 | 90.3604102 | 85.9883597 | 83.7962729 | 84.7202706 | 90.9642159 | 85.5473662 | 12.4556293 |            |            |            |            |            |            |            |            |            |            |            |            |            |    |
| 19 | 30.9768177 | 31.0693763 | 30.0888883                  | 28.8702903 | 73.5174645 | 28.0756578 | 31.0559278 | 27.9576147 | 28.1706154 | 29.3842704 | 27.9468201 | 31.6135716 | 28.7108836 | 28.0150243 | 28.0262173 | 27.9978429 | 30.9768177 | 31.0693763 | 30.0888883 | 28.8702903 | 73.5174645 | 28.0756578 | 31.0559278 | 27.9576147 | 28.1706154 | 29.3842704 | 27.9468201 | 31.6135716 | 28.7108836 | 28.0150243 | 28.0262173 | 27.9978429 | 31.9673302 | 28.7905869 | 10.5787658 |            |            |            |            |            |            |            |            |            |            |            |            |            |    |
| 20 | 38.1063692 | 37.9446428 | 36.941217                   | 36.923679  | 37.7731006 | 36.9012552 | 40.8932957 | 36.8823408 | 38.2249488 | 44.1926246 | 36.9763778 | 37.9819014 | 37.0450164 | 39.0323111 | 36.7959922 | 38.1063692 | 37.9446428 | 36.941217  | 36.923679  | 37.7731006 | 36.9012552 | 40.8932957 | 36.8823408 | 38.2249488 | 44.1926246 | 36.9763778 | 37.9819014 | 37.0450164 | 39.0323111 | 36.7959922 | 38.1063692 | 37.4005853 | 37.4005853 | 1.91442091 |            |            |            |            |            |            |            |            |            |            |            |            |            |            |    |
| 21 | 25.2557253 | 38.5458812 | 20.139227                   | 36.0896899 | 18.8069865 | 18.5616776 | 19.6506358 | 18.8916821 | 32.4259339 | 19.0433    | 19.9874687 | 19.782373  | 25.638185  | 41.2089163 | 46.0360721 | 27.3632025 | 25.2557253 | 38.5458812 | 20.139227  | 36.0896899 | 18.8069865 | 18.5616776 | 19.6506358 | 18.8916821 | 32.4259339 | 19.0433    | 19.9874687 | 19.782373  | 25.638185  | 41.2089163 | 46.0360721 | 27.3632025 | 26.7139119 | 22.6974762 | 9.09840468 |            |            |            |            |            |            |            |            |            |            |            |            |            |    |
| 22 | 52.4318702 | 52.3625319 | 48.4158447                  | 46.3981925 | 46.9806802 | 46.1751542 | 46.8493563 | 46.0484659 | 52.0530841 | 52.6427368 | 46.3485922 | 54.77235   | 46.860456  | 46.4833523 | 47.1815097 | 46.5375882 | 52.4318702 | 52.3625319 | 48.4158447 | 46.3981925 | 46.9806802 | 46.1751542 | 46.8493563 | 46.0484659 | 52.0530841 | 52.6427368 | 46.3485922 | 54.77235   | 46.860456  | 46.4833523 | 47.1815097 | 46.5375882 | 46.6588603 | 46.9205681 | 2.97244969 |            |            |            |            |            |            |            |            |            |            |            |            |            |    |
| 23 | 46.21588   | 46.1955855 | 7.04334672                  | 32.1586975 | 16.839706  | 17.2366363 | 22.7733191 | 22.0934408 | 12.630202  | 16.9370685 | 16.2523685 | 15.9184181 | 17.456181  | 17.456181  | 9.5664049  | 16.2248103 | 16.281273  | 46.21588   | 46.1955855 | 7.04334672 | 32.1586975 | 16.839706  | 17.2366363 | 22.7733191 | 22.0934408 | 12.630202  | 16.9370685 | 16.2523685 | 15.9184181 | 17.456181  | 17.456181  | 9.5664049  | 16.2248103 | 20.7388538 | 16.8884172 | 11.2105956 |            |            |            |            |            |            |            |            |            |            |            |            |    |
| 24 | 53.5684342 | 53.7150466 | 5.04601212                  | 5.75147618 | 6.07984503 | 6.36691173 | 10.5396039 | 9.80408039 | 5.26309809 | 8.37245043 | 4.94407378 | 5.83124185 | 6.28700082 | 4.71590407 | 10.8340024 | 6.8857085  | 53.5684342 | 53.7150466 | 5.04601212 | 5.75147618 | 6.07984503 | 6.36691173 | 10.5396039 | 9.80408039 | 5.26309809 | 8.37245043 | 4.94407378 | 5.83124185 | 6.28700082 | 4.71590407 | 10.8340024 | 6.8857085  | 12.7503659 | 6.32695678 | 15.8211606 |            |            |            |            |            |            |            |            |            |            |            |            |            |    |
| 25 | 24.0552842 | 48.8173203 | 17.193125                   | 17.6217408 | 14.1744288 | 13.856298  | 20.9941113 | 13.9896979 | 12.447118  | 12.4494099 | 12.6300168 | 12.1258789 | 13.1482452 | 12.4600105 | 22.6558215 | 14.3419225 | 24.0552842 | 48.8173203 | 17.193125  | 17.6217408 | 14.1744288 | 13.856298  | 20.9941113 | 13.9896979 | 12.447118  | 12.4494099 | 12.6300168 | 12.1258789 | 13.1482452 | 12.4600105 | 22.6558215 | 14.3419225 | 18.2554    | 14.2581757 | 8.92049968 |            |            |            |            |            |            |            |            |            |            |            |            |            |    |
| 26 | 80.302723  | 88.7296332 | 84.870121                   | 76.3192576 | 82.5929319 | 73.3195743 | 90.2709523 | 73.2967725 | 74.8242868 | 75.2523496 | 74.6244874 | 74.5739108 | 75.4726695 | 73.8653314 | 82.8556084 | 74.0453059 | 80.302723  | 88.7296332 | 84.870121  | 76.3192576 | 82.5929319 | 73.3195743 | 90.2709523 | 73.2967725 | 74.8242868 | 75.2523496 | 74.6244874 | 74.5739108 | 75.4726695 | 73.8653314 | 82.8556084 | 74.0453059 | 78.4509947 | 75.3625095 | 5.60161865 |            |            |            |            |            |            |            |            |            |            |            |            |            |    |
| 27 | 58.1689801 | 57.0196336 | 41.7053488                  | 42.6183018 | 99.9912275 | 56.8907388 | 61.9834811 | 43.0453353 | 40.1020373 | 50.6360843 | 40.1244345 | 41.6705306 | 99.9912275 | 39.9135924 | 57.0196336 | 41.7053488 | 58.1689801 | 57.0196336 | 41.7053488 | 42.6183018 | 99.9912275 | 56.8907388 | 61.9834811 | 43.0453353 | 40.1020373 | 50.6360843 | 40.1244345 | 41.6705306 | 99.9912275 | 59.9135924 | 50.0396216 | 40.1278151 | 54.0017744 | 46.5424785 | 19.1517682 |            |            |            |            |            |            |            |            |            |            |            |            |            |    |
| 28 | 27.7884631 | 27.8047176 | 23.856141                   | 23.4483501 | 31.3009044 | 23.3891032 | 30.2359885 | 23.4032136 | 23.4024876 | 31.7767006 | 23.3907246 | 31.5109217 | 23.8867269 | 44.1226257 | 39.3980132 | 23.6915994 | 27.7884631 | 27.8047176 | 23.856141  | 23.4483501 | 31.3009044 | 23.3891032 | 30.2359885 | 23.4032136 | 23.4024876 | 31.7767006 | 23.3907246 | 31.5109217 | 23.8867269 | 44.1226257 | 39.3980132 | 23.6915994 | 28.2753669 | 25.837595  | 6.16623215 |            |            |            |            |            |            |            |            |            |            |            |            |            |    |
| 29 | 50.0175115 | 50.8517387 | 50.9084193                  | 48.6441232 | 99.8487257 | 50.6143296 | 51.7181912 | 51.0222701 | 44.3045896 | 47.5569957 | 44.5436781 | 44.9513773 | 97.8575041 | 44.3215827 | 45.0353915 | 44.3782325 | 50.0175115 | 50.8517387 | 50.9084193 | 48.6441232 | 99.8487257 | 50.6143296 | 51.7181912 | 51.0222701 | 44.3045896 | 47.5569957 | 44.5436781 | 44.9513773 | 97.8575041 | 44.3215827 | 45.0353915 | 44.3782325 | 54.1609163 | 49.3308173 | 17.3914154 |            |            |            |            |            |            |            |            |            |            |            |            |            |    |
| 30 | 36.8078693 | 47.1165057 | 50.9319761                  | 47.0225564 | 50.9280729 | 37.6546968 | 39.2405785 | 37.1367923 | 36.9922662 | 44.1091706 | 37.9906911 | 47.9527308 | 36.9185101 | 36.91771   | 47.9148577 | 43.3701086 | 36.8078693 | 47.1165057 | 50.9319761 | 47.0225564 | 50.9280729 | 37.6546968 | 39.2405785 | 37.1367923 | 36.9922662 | 44.1091706 | 37.9906911 | 47.9527308 | 36.9185101 | 36.91771   | 47.9148577 | 43.3701086 | 42.378813  | 41.3053435 | 5.41498672 |            |            |            |            |            |            |            |            |            |            |            |            |            |    |
| 31 | 41.5293216 | 41.3194974 | 29.7345134                  | 28.4485478 | 97.9313941 | 41.9621005 | 29.9250935 | 29.3148033 | 28.6695396 | 29.1110122 | 31.2788589 | 38.2878913 | 29.1110122 | 31.2788589 | 38.2878913 | 29.7345134 | 41.5293216 | 41.3194974 | 29.7345134 | 28.4485478 | 97.9313941 | 41.9621005 | 29.9250935 | 29.3148033 | 28.6695396 | 29.1110122 | 31.2788589 | 38.2878913 | 29.1110122 | 31.2788589 | 38.2878913 | 29.7345134 | 41.5293216 | 41.3194974 | 29.7345134 | 28.4485478 | 97.9313941 | 41.9621005 | 29.9250935 | 29.3148033 | 28.6695396 | 29.1110122 | 31.2788589 | 38.2878913 | 29.1110122 | 31.2788589 | 38.2878913 | 29.7345134 | 41 |
