# Supplementary material
Source: Frontiers journal article supplement (https://www.frontiersin.org/articles/318948)
Supplement: Data_Sheet_1.ZIP [file Data_Sheet_1.ZIP]

| Jellyfish (all tasks)       |            |            |            |            |            |            |            |  |
|-----------------------------|------------|------------|------------|------------|------------|------------|------------|--|
| Proportion of artifacts [%] |            |            |            |            |            |            |            |  |
| Vp                          | AF8        | Fp2        | Fp1        | AF7        | mean       | median     | std        |  |
| 11                          | 15.9286865 | 34.1534207 | 34.3546153 | 34.2285456 | 29.666317  | 34.1909831 | 9.15879656 |  |
| 12                          | 9.32884476 | 9.74882055 | 9.29804964 | 9.38536021 | 9.44026879 | 9.35710249 | 0.20885461 |  |
| 13                          | 52.9494078 | 54.5120718 | 54.7183777 | 53.600339  | 53.9450491 | 54.0562054 | 0.82253234 |  |
| 14                          | 0.20769684 | 1.99588456 | 0.30399807 | 0.1900384  | 0.67440447 | 0.25584745 | 0.88240902 |  |
| 15                          | 1.50173716 | 22.82393   | 2.16608129 | 1.47128814 | 6.99075914 | 1.83390922 | 10.5603147 |  |
| 16                          | 14.3139146 | 14.5049819 | 15.0383096 | 25.8232231 | 17.4201073 | 14.7716458 | 5.61045762 |  |
| 17                          | 37.7798746 | 36.3511378 | 43.478204  | 37.2035574 | 38.7031934 | 37.491716  | 3.23699024 |  |
| 18                          | 0          | 0          | 22.2563798 | 0          | 5.56409495 | 0          | 11.1281899 |  |
| 19                          | 0.49326774 | 0.48695496 | 19.778382  | 1.64545028 | 5.60101375 | 1.06935901 | 9.46725795 |  |
| 20                          | 2.73969466 | 0          | 2.72863191 | 3.40212668 | 2.21761331 | 2.73416329 | 1.5115764  |  |
| 21                          | 38.6958886 | 15.9209646 | 35.2545062 | 27.3253835 | 29.2991857 | 31.2899448 | 10.1100044 |  |
| 22                          | 55.7837543 | 6.74584131 | 2.50079647 | 21.858685  | 21.7222693 | 14.3022632 | 24.179618  |  |
| 23                          | 41.0519221 | 41.0986813 | 43.0034513 | 41.1142991 | 41.5670884 | 41.1064902 | 0.95794192 |  |
| 24                          | 53.6237912 | 54.2687117 | 53.778155  | 75.4323246 | 59.2757456 | 54.0234333 | 10.7745615 |  |
| 25                          | 66.3890531 | 12.5852206 | 20.1097928 | 84.7211036 | 45.9512925 | 43.2494229 | 35.1277581 |  |
| 26                          | 5.5387744  | 4.91712863 | 50.7083165 | 12.6441508 | 18.4520926 | 9.09146259 | 21.787957  |  |
| 27                          | 1.44415569 | 1.351712   | 1.4158146  | 1.41665454 | 1.40708421 | 1.41623457 | 0.03919263 |  |
| 28                          | 24.6619887 | 59.6002484 | 0          | 20.6378862 | 26.2250308 | 22.6499375 | 24.7340297 |  |
| 29                          | 1.72724128 | 4.30944772 | 2.12461352 | 1.73718714 | 2.47462241 | 1.93090033 | 1.23713102 |  |
| 30                          | 2.75474984 | 2.87626973 | 33.9095441 | 5.78605539 | 11.3316548 | 4.33116256 | 15.1170058 |  |
| 31                          | 79.0333851 | 48.3623057 | 42.3392843 | 43.7972965 | 53.3830679 | 46.0798011 | 17.2916068 |  |
| 32                          | 37.5022144 | 25.4697917 | 10.1938145 | 29.0573184 | 25.5557847 | 27.2635551 | 11.416004  |  |
| 33                          | 41.6217028 | 37.9530413 | 0.03765473 | 24.1444373 | 25.939209  | 31.0487393 | 18.8359983 |  |
| 34                          | 7.96552814 | 0          | 6.88028396 | 0.03186361 | 3.71941893 | 3.45607379 | 4.29932756 |  |
