# Supplementary material
Source: Frontiers journal article supplement (https://www.frontiersin.org/articles/318948)
Supplement: Data_Sheet_1.ZIP [file Data_Sheet_1.ZIP]

**g.SAHARA (tasks: 0-back, stop, rest measurements)**

**parietal alpha**

| Vp | Task      | P3       | Pz       | P4       | PO7      | PO8      | Oz       | mean     | median   | std        |
|----|-----------|----------|----------|----------|----------|----------|----------|----------|----------|------------|
|    | 11 0-back | 1.078332 | 21.92892 | 19.13219 | 13.09513 | 14.09005 | 9.850378 | 13.19583 | 13.59259 | 7.3531315  |
|    | 12 0-back | 18.31064 | 20.01321 | 16.98708 | 16.61594 | 14.42085 | 14.64247 | 16.8317  | 16.80151 | 2.14405701 |
|    | 13 0-back | 10.13287 | 11.96903 | 9.13597  | 10.84672 | 30.07081 | 30.19502 | 17.0584  | 11.40788 | 10.1696409 |
|    | 14 0-back | 43.78525 | 43.04372 | 27.20456 | 28.43518 | 22.39193 | 17.55388 | 30.40242 | 27.81987 | 10.791218  |
|    | 15 0-back | 18.1461  | 20.75796 | 20.43764 | 18.22056 | 18.32964 | 18.78809 | 19.11333 | 18.55887 | 1.1756799  |
|    | 16 0-back | 14.28423 | 14.31457 | 14.25117 | 14.3117  | 14.1045  | 14.37131 | 14.27291 | 14.29796 | 0.09152661 |
|    | 17 0-back | 14.85485 | 14.06451 | 22.91611 | 15.22686 | 9.858808 | 12.66056 | 14.93028 | 14.45968 | 4.37008298 |
|    | 18 0-back | 49.16923 | 56.0271  | 58.75613 | 35.51166 | 34.78053 | 19.68921 | 42.32231 | 42.34045 | 14.9685843 |
|    | 19 0-back | 12.82404 | 16.68948 | 14.83394 | 15.4093  | 13.57447 | 14.05511 | 14.56439 | 14.44452 | 1.38352198 |
|    | 20 0-back | 34.82232 | 36.60168 | 32.44199 | 15.42622 | 14.56749 | 15.42892 | 24.88144 | 23.93545 | 10.7561685 |
|    | 21 0-back | 15.15507 | 15.30084 | 15.28794 | 15.08617 | 2.15375  | 0.329342 | 10.55219 | 15.12062 | 7.23548183 |
|    | 22 0-back | 28.27331 | 37.70357 | 31.76273 | 21.84166 | 13.35081 | 15.96649 | 24.81643 | 25.05748 | 9.4330341  |
|    | 23 0-back | 14.79812 | 13.39464 | 15.36281 | 14.94978 | 16.09897 | 15.09648 | 14.95013 | 15.02313 | 0.88929565 |
|    | 24 0-back | 12.72761 | 14.20642 | 13.13917 | 14.10251 | 13.88719 | 12.22131 | 13.3807  | 13.51318 | 0.81097574 |
|    | 25 0-back | 19.01136 | 14.42094 | 15.01525 | 15.77326 | 0.111094 | 14.10829 | 13.07336 | 14.71809 | 6.59132061 |
|    | 26 0-back | 20.64606 | 19.49533 | 18.59663 | 24.88314 | 20.10756 | 20.09533 | 20.63734 | 20.10145 | 2.19408533 |
|    | 27 0-back | 13.90463 | 14.92862 | 14.88865 | 14.66383 | 13.21249 | 14.05135 | 14.27493 | 14.35759 | 0.67395789 |
|    | 28 0-back | 20.47942 | 19.05874 | 16.93703 | 25.297   | 3.016823 | 17.24395 | 17.00549 | 18.15135 | 7.493697   |
|    | 29 0-back | 35.76487 | 22.75396 | 27.82725 | 23.17561 | 21.94337 | 21.838   | 25.55051 | 22.96479 | 5.47305517 |
|    | 30 0-back | 32.88107 | 42.96699 | 31.48773 | 25.4827  | 21.87792 | 23.33857 | 29.6725  | 28.48522 | 7.85826926 |
|    | 31 0-back | 13.44022 | 15.0525  | 15.08097 | 15.46639 | 14.50421 | 14.7005  | 14.70746 | 14.8765  | 0.70452605 |
|    | 32 0-back | 19.63152 | 16.69948 | 15.86286 | 17.39113 | 16.13606 | 15.98932 | 16.95173 | 16.41777 | 1.42934526 |
|    | 33 0-back | 15.26199 | 16.59494 | 13.42845 | 14.5238  | 16.62342 | 17.34687 | 15.62991 | 15.92846 | 1.48805709 |
|    | 34 0-back | 13.0742  | 12.88221 | 12.22246 | 12.26421 | 12.26293 | 12.53441 | 12.54007 | 12.39931 | 0.36225953 |
|    | 11 stop   | 23.09237 | 26.04947 | 24.3076  | 16.76913 | 24.89109 | 8.786147 | 20.6493  | 23.69999 | 6.66778108 |
|    | 12 stop   | 14.42549 | 28.2592  | 11.93884 | 11.85544 | 9.228614 | 10.30103 | 14.33477 | 11.89714 | 7.04456337 |
|    | 13 stop   | 10.10983 | 11.65601 | 8.677052 | 10.04364 | 5.464071 | 5.555633 | 8.584373 | 9.360347 | 2.56162446 |
|    | 14 stop   | 30.25552 | 31.85037 | 24.99378 | 24.94045 | 22.41741 | 15.25345 | 24.95183 | 24.96711 | 5.93637332 |
|    | 15 stop   | 18.33701 | 17.47912 | 16.31185 | 18.12611 | 18.20618 | 19.70359 | 18.02731 | 18.16614 | 1.11273488 |

|                |          |          |          |          |          |          |          |          |            |
|----------------|----------|----------|----------|----------|----------|----------|----------|----------|------------|
| 16 stop        | 15.00429 | 15.00326 | 13.26948 | 15.02788 | 15.01204 | 15.13935 | 14.74272 | 15.00817 | 0.72358721 |
| 17 stop        | 15.71558 | 13.59611 | 16.2581  | 15.88064 | 13.15114 | 14.05254 | 14.77568 | 14.88406 | 1.33081642 |
| 18 stop        | 45.86462 | 54.03959 | 62.31482 | 37.77198 | 41.72317 | 26.73026 | 44.74074 | 43.79389 | 12.4789964 |
| 19 stop        | 14.66836 | 15.57128 | 12.82176 | 16.04797 | 12.94597 | 13.48187 | 14.2562  | 14.07511 | 1.37721935 |
| 20 stop        | 40.11686 | 42.93621 | 39.33517 | 15.87263 | 16.35742 | 16.10204 | 28.45339 | 27.84629 | 13.574574  |
| 21 stop        | 16.54715 | 14.39606 | 13.73178 | 14.14339 | 13.00445 | 13.90834 | 14.28853 | 14.02586 | 1.20311065 |
| 22 stop        | 26.02749 | 28.02061 | 31.43837 | 16.79625 | 15.19571 | 15.57022 | 22.17477 | 21.41187 | 7.1566398  |
| 23 stop        | 14.90289 | 12.91863 | 14.75772 | 14.77243 | 15.71639 | 15.27684 | 14.72415 | 14.83766 | 0.95763668 |
| 24 stop        | 12.26243 | 15.41996 | 12.83409 | 14.96353 | 14.21472 | 12.44016 | 13.68915 | 13.52441 | 1.35812894 |
| 25 stop        | 16.44661 | 13.56686 | 15.28276 | 15.44827 | 13.82585 | 13.62171 | 14.69868 | 14.55431 | 1.19674663 |
| 26 stop        | 20.23043 | 19.34223 | 19.30146 | 22.6478  | 20.61546 | 21.35993 | 20.58288 | 20.42294 | 1.27860986 |
| 27 stop        | 13.89497 | 14.97573 | 14.26795 | 13.35934 | 12.41332 | 12.8616  | 13.62882 | 13.62716 | 0.94150891 |
| 28 stop        | 21.38193 | 21.21222 | 19.30063 | 24.33134 | 13.41831 | 9.193717 | 18.13969 | 20.25643 | 5.69137421 |
| 29 stop        | 31.58586 | 19.17631 | 26.4098  | 20.21761 | 19.9602  | 20.74443 | 23.0157  | 20.48102 | 4.94029187 |
| 30 stop        | 28.75306 | 39.25603 | 32.86519 | 20.94809 | 19.37947 | 19.27259 | 26.74574 | 24.85057 | 8.26688562 |
| 31 stop        | 14.6996  | 14.07507 | 16.08161 | 14.42403 | 14.29944 | 13.4471  | 14.50447 | 14.36173 | 0.88049929 |
| 32 stop        | 20.08312 | 19.439   | 14.41255 | 17.26514 | 15.65082 | 17.06181 | 17.31874 | 17.16347 | 2.16490633 |
| 33 stop        | 4.224272 | 12.15144 | 14.71375 | 14.1004  | 14.66451 | 15.38569 | 12.54001 | 14.38245 | 4.22075449 |
| 34 stop        | 16.75253 | 14.45289 | 15.2723  | 14.87513 | 13.45582 | 13.71799 | 14.75444 | 14.66401 | 1.19387453 |
| 11 eyes opened | 12.52769 | 17.86115 | 22.33891 | 14.85271 | 9.09059  | 7.659307 | 14.05506 | 13.6902  | 5.5068894  |
| 12 eyes opened | 19.24737 | 19.19786 | 20.03843 | 15.52825 | 14.64239 | 16.80476 | 17.57651 | 18.00131 | 2.23076737 |
| 13 eyes opened | 12.45579 | 12.15864 | 12.65586 | 11.73054 | 14.30994 | 6.803013 | 11.68563 | 12.30722 | 2.54900754 |
| 14 eyes opened | 46.37888 | 49.69776 | 37.59169 | 38.60008 | 33.81606 | 16.1253  | 37.03496 | 38.09589 | 11.8151614 |
| 15 eyes opened | 17.13546 | 21.64885 | 18.78027 | 18.31192 | 23.33585 | 23.70373 | 20.48602 | 20.21456 | 2.78172266 |
| 16 eyes opened | 16.40792 | 16.59346 | 16.5236  | 16.57496 | 16.64769 | 15.69219 | 16.40664 | 16.54928 | 0.3592937  |
| 17 eyes opened | 13.72316 | 13.90095 | 18.68829 | 23.98879 | 13.79556 | 18.18239 | 17.04652 | 16.04167 | 4.09118031 |
| 18 eyes opened | 61.50712 | 67.18703 | 69.42897 | 56.43938 | 56.82252 | 48.19834 | 59.93056 | 59.16482 | 7.80839057 |
| 19 eyes opened | 15.76944 | 15.77034 | 15.13303 | 15.38937 | 15.48784 | 15.75566 | 15.55095 | 15.62175 | 0.26173673 |
| 20 eyes opened | 34.97333 | 37.89604 | 38.75459 | 17.43601 | 18.40018 | 17.10281 | 27.42716 | 26.68675 | 10.7958748 |
| 21 eyes opened | 41.95836 | 19.08084 | 25.66227 | 17.05922 | 15.44925 | 17.26069 | 22.7451  | 18.17076 | 10.0670119 |
| 22 eyes opened | 21.59808 | 27.57647 | 30.48026 | 17.53815 | 17.33266 | 14.49803 | 21.50394 | 19.56811 | 6.31931225 |
| 23 eyes opened | 13.68059 | 13.55615 | 13.85258 | 14.07419 | 14.76771 | 14.58979 | 14.08683 | 13.96338 | 0.49360737 |
| 24 eyes opened | 14.63192 | 14.95905 | 12.33431 | 13.56934 | 11.26941 | 14.39586 | 13.52665 | 13.9826  | 1.4524137  |
