# Supplementary material
Source: Frontiers journal article supplement (https://www.frontiersin.org/articles/318948)
Supplement: Data_Sheet_1.ZIP [file Data_Sheet_1.ZIP]

| g.LADYbird (all tasks)      |     |     |    |    |    |    |    |    |    |    |    |    |    |     |     |    |      |        |     |
|-----------------------------|-----|-----|----|----|----|----|----|----|----|----|----|----|----|-----|-----|----|------|--------|-----|
| Proportion of artifacts [%] |     |     |    |    |    |    |    |    |    |    |    |    |    |     |     |    |      |        |     |
| Vn                          | Fn1 | Fn2 | F3 | F7 | F4 | T7 | C3 | C7 | C4 | T8 | P3 | P7 | P4 | PO7 | PO8 | O7 | mean | median | std |

|    |            |            |            |            |            |            |            |            |            |            |            |            |            |            |            |            |            |            |             |
|----|------------|------------|------------|------------|------------|------------|------------|------------|------------|------------|------------|------------|------------|------------|------------|------------|------------|------------|-------------|
| 11 | 7.54748191 | 7.35879289 | 2.90145242 | 2.83722393 | 2.84924055 | 3.10505153 | 3.63016527 | 2.76343228 | 2.79365224 | 5.62827173 | 2.73072837 | 2.37582954 | 2.3564237  | 2.35994003 | 2.43516594 | 2.58795699 | 3.51630058 | 2.81543808 | 1.72553031  |
| 12 | 0.43229436 | 0.45686756 | 0.47788412 | 0.43229436 | 0.47432747 | 0.46721417 | 0.47432747 | 0.47077082 | 0.48467408 | 0.48823073 | 0.49534402 | 0.45686756 | 0.47077082 | 0.49534402 | 0.46721417 | 0.50213399 | 0.47165998 | 0.47254915 | 0.0202081   |
| 13 | 1.72381891 | 1.87146238 | 0.51428854 | 0.50979558 | 0.55386783 | 0.71856712 | 0.75751424 | 0.550399   | 0.53368204 | 0.45981129 | 0.43564034 | 0.36164903 | 0.39303708 | 0.08830475 | 66.0639247 | 78.6154175 | 9.63444865 | 0.54204052 | 24.58907502 |
| 14 | 0          | 1.16880316 | 0.38905341 | 0          | 0          | 0          | 0          | 0.29872655 | 0          | 0.0635356  | 0          | 0          | 0          | 0.39879383 | 0          | 0          | 0.14493203 | 0          | 0.30915901  |
| 15 | 0.16045549 | 0.14751553 | 0.14973381 | 0.18559598 | 0.18559598 | 0.15269151 | 0.16154643 | 0.15084295 | 0.16748004 | 0.15638864 | 0.15454008 | 0.14080609 | 0.14566696 | 0.14566696 | 0.14270926 | 0.14160012 | 0.15555679 | 0.15176723 | 0.0139263   |
| 16 | 0          | 0          | 0          | 0          | 0          | 95.518463  | 0          | 0          | 0          | 0          | 0          | 0          | 0          | 0          | 0          | 0          | 5.96990394 | 0          | 23.8796157  |
| 17 | 0          | 0          | 0          | 0          | 0          | 0          | 0.21575553 | 0          | 0          | 0.14806314 | 0          | 0          | 0          | 0          | 0          | 0.16009852 | 0.03274482 | 0          | 0.0716236   |
| 18 | 0          | 0          | 0          | 0          | 0          | 0          | 0          | 0          | 0          | 0          | 0          | 0          | 0          | 0          | 0          | 0          | 0          | 0          | 0           |
| 19 | 0          | 0          | 0          | 0          | 0          | 0          | 0.02117464 | 0          | 0          | 0          | 0          | 0          | 0          | 0          | 0          | 0          | 0.00132341 | 0          | 0.00529366  |
| 20 | 0.18874874 | 0.18865616 | 0.07371076 | 0.17078993 | 0.66793652 | 0.08856502 | 0.42199438 | 0.23091751 | 0.36086047 | 0.2352115  | 0.07118834 | 0.22113688 | 2.61057239 | 0          | 99.7267288 | 99.9077115 | 12.8227953 | 0.22602719 | 33.9647188  |
| 21 | 0.09471813 | 0.107161   | 0.1234129  | 0.11528695 | 0.12772981 | 0.41401612 | 0.28821737 | 0.3539868  | 0.12747588 | 99.8652777 | 0.59294058 | 0.11097004 | 0.20542753 | 0.97484538 | 0.32469413 | 0.11300152 | 6.49619761 | 0.16657867 | 24.8995318  |
| 22 | 0.90063131 | 0.97600071 | 0.74542929 | 0.5469646  | 0.57102853 | 0.68571165 | 0.83391993 | 0.59267543 | 0.52476136 | 0.63102723 | 23.1352787 | 0.59449868 | 0.58524264 | 0.66871108 | 2.59661094 | 1.54161293 | 2.25813156 | 0.67721137 | 5.59196889  |
| 23 | 0          | 0.18600388 | 0          | 0          | 0          | 0.45483476 | 0          | 0          | 0          | 0          | 0          | 99.9316576 | 0          | 0.34721444 | 0          | 0          | 6.30748192 | 0          | 24.9668433  |
| 24 | 0.90535188 | 0.88859551 | 99.8030368 | 0.88631055 | 0.88859551 | 0.90255916 | 0.91525338 | 0.90281304 | 0.89341932 | 1.19004602 | 0.90332081 | 0.90535188 | 1.10153431 | 0.8855489  | 0.16756372 | 20.4242821 | 8.28522393 | 0.90306692 | 24.887756   |
| 25 | 0          | 1.94262033 | 0          | 0          | 0          | 0          | 0          | 0          | 0          | 0.12015582 | 0          | 0          | 0          | 0          | 0          | 0          | 0.12892351 | 0          | 0.48458029  |
| 26 | 0.84833911 | 1.39525578 | 0.11184431 | 0.10261716 | 0.10569288 | 0.12079186 | 0.25332737 | 0.14483838 | 0.13868695 | 0.17531596 | 0.12386758 | 0.15714126 | 0.10848898 | 0.11771614 | 0.12666368 | 0.1297394  | 0.26002055 | 0.12820154 | 0.35280928  |
| 27 | 1.43332754 | 1.442151   | 1.44244154 | 1.48006608 | 1.46212131 | 2.7867904  | 1.58337895 | 1.32145948 | 1.30769002 | 1.26520173 | 1.01000873 | 0.99387784 | 3.66525727 | 1.07077508 | 0.67753952 | 0.78999627 | 1.38895982 | 1.31457475 | 0.66055988  |
| 28 | 0.99349963 | 2.36612727 | 1.11045834 | 0.97771364 | 1.09581559 | 1.39120022 | 0.8331366  | 0.70035914 | 0.75611862 | 0.80384536 | 0.67385368 | 0.62539724 | 0.64703052 | 0.56682506 | 0.51149041 | 0.29813699 | 0.89693802 | 0.77998199 | 0.47448754  |
| 29 | 0.21705167 | 0.22402634 | 0.15372168 | 0.16488115 | 0.15595358 | 0.15372168 | 0.15595358 | 0.147026   | 0.25507966 | 0.28735632 | 0.12442808 | 0          | 0          | 0          | 0          | 0          | 0.12744998 | 0.15372168 | 0.09839752  |
| 30 | 0          | 0          | 0          | 0          | 0          | 0          | 0          | 0          | 0          | 0          | 0          | 0          | 0          | 0          | 0          | 0          | 0          | 0          | 0           |
| 31 | 0.10036352 | 0.12170065 | 0.12387387 | 0.13019599 | 0.12170065 | 0.13454244 | 0.26058954 | 0.13236921 | 0.13671566 | 0.24853992 | 0.14955745 | 0.14303777 | 0.1539039  | 0.13869132 | 0.12387387 | 0.11537854 | 0.14593964 | 0.13345582 | 0.04443415  |
| 32 | 0          | 0          | 62.1164582 | 0          | 0          | 0          | 0          | 0          | 0          | 0          | 0          | 0.1824939  | 0          | 0          | 0          | 0          | 3.89368451 | 0          | 15.5261397  |
| 33 | 0.1508717  | 0.31223796 | 0.95339687 | 0.81098304 | 1.13655962 | 2.06045937 | 1.62224316 | 1.07197754 | 79.9340698 | 0.90118273 | 35.0600761 | 34.3896668 | 0.98193505 | 1.31663527 | 0.27679264 | 57.1260697 | 13.6315723 | 1.10426858 | 24.638962   |
| 34 | 0          | 0          | 0          | 0          | 0          | 0          | 0          | 0          | 0          | 0          | 0          | 0          | 0          | 0          | 0          | 0          | 0          | 0          | 0           |
