# Supplementary material
Source: Frontiers journal article supplement (https://www.frontiersin.org/articles/318948)
Supplement: Data_Sheet_1.ZIP [file Data_Sheet_1.ZIP]

| g.SAHARA (all tasks) |             |             |             |             |             |             |             |             |             |             |             |             |             |             |             |             |             |             |            |
|----------------------|-------------|-------------|-------------|-------------|-------------|-------------|-------------|-------------|-------------|-------------|-------------|-------------|-------------|-------------|-------------|-------------|-------------|-------------|------------|
| SNR [dB]             |             |             |             |             |             |             |             |             |             |             |             |             |             |             |             |             |             |             |            |
| Vp                   | Fp1         | Fp2         | F3          | Fz          | F4          | T7          | C3          | Cz          | C4          | T8          | P3          | Pz          | P4          | PO7         | PO8         | Oz          | mean        | median      | std        |
| 11                   | -10.8216085 | -3.22115088 | -4.33539724 | -12.744545  | -17.1493607 | -6.32600212 | -13.409605  | -26.0161915 | -10.4395666 | -5.73495865 | -20.3188019 | -9.44858742 | -17.0762177 | -12.6180067 | -12.4434881 | -14.8721476 | -12.3109772 | -12.5307474 | 6.02967355 |
| 12                   | -6.23094034 | -10.2214231 | -1.67877567 | -3.87228942 | -4.66689873 | -4.3532629  | -3.06073332 | -5.82117987 | -11.5894928 | -5.27933741 | -3.60914326 | -7.10014868 | -2.68804955 | -2.99579191 | -3.76198959 | -9.35144234 | -5.39255618 | -4.51008081 | 2.8665157  |
| 13                   | -9.96616459 | -9.39800644 | -3.74024701 | -7.82337236 | -3.27668047 | -10.4676723 | -4.42653036 | -5.32738447 | -4.51923466 | -8.21368217 | -5.49343157 | -1.37264287 | -9.45815659 | -8.4666748  | -18.6550617 | -17.8916302 | -8.03103579 | -8.01852727 | 4.81925339 |
| 14                   | 4.01521969  | 2.36237931  | 5.41315269  | 7.98435545  | 8.21506596  | 10.9367561  | 10.1824236  | 8.92007542  | 10.5141792  | 12.7677546  | 13.0218296  | 13.1809931  | 13.2559309  | 16.3222008  | 14.86199    | 16.5117893  | 10.529131   | 10.7254677  | 4.19384352 |
| 15                   | -17.35993   | -19.0108604 | -7.59503937 | -6.92729712 | -10.2472754 | -1.3316443  | -0.45799008 | -1.26797104 | -1.31292188 | -1.83308971 | -1.38744128 | -5.71974802 | -9.61073399 | -9.28293228 | -13.4085579 | -10.8189659 | -7.34827492 | -7.26116824 | 5.93407201 |
| 16                   | -0.90648729 | -2.41301346 | 5.47593355  | 6.48618031  | 3.8136518   | 7.63868141  | 9.85467339  | 9.19016647  | 11.9748659  | 1.18714297  | 12.3019857  | 13.8662844  | 10.3501415  | 10.3886843  | -4.04378462 | 7.93160343  | 6.44354436  | 7.78514242  | 5.48690435 |
| 17                   | -12.2884378 | -1.58959067 | 7.88237381  | 6.86834192  | 6.12671995  | 0.94562554  | 4.50614786  | 7.71076965  | 3.95135546  | -2.95711446 | -0.55278891 | -5.2884984  | -0.81037199 | -9.33870697 | -6.80089426 | -14.0357752 | -0.97942778 | -0.68158045 | 7.06841353 |
| 18                   | -1.09E+01   | -1.28E+01   | -2.63E+00   | 1.17E+00    | -4.48E+00   | -4.39E+00   | 3.49718189  | 3.06E+00    | 2.94E+00    | -1.41143143 | 7.07687759  | 7.88E+00    | 7.77977896  | 9.25E+00    | 7.04182863  | 4.96E+00    | 1.13047416  | 2.99866021  | 6.69969147 |
| 19                   | -1.69155991 | -1.59042537 | 10.3102598  | 7.11782646  | 1.88625872  | 10.3929472  | 10.626461   | 5.53173494  | 8.51604939  | 7.55559683  | 9.11724567  | 6.56565142  | 10.0673714  | 9.00568962  | 9.2027483   | 10.9007359  | 7.09466196  | 8.7608695   | 4.11431884 |
| 20                   | -5.56421614 | -4.5928936  | 1.99221635  | 2.38406181  | 1.79822099  | 3.03872728  | 5.49749899  | 5.97102213  | 5.83933592  | 3.41539741  | 7.328619    | 8.06094646  | 7.06503677  | 6.42636108  | 5.67017126  | 6.00251484  | 3.77081379  | 5.58383512  | 3.96980698 |
| 21                   | -2.86276078 | -5.21127605 | 4.51838684  | 3.73476934  | 1.84785008  | -3.66816235 | 4.52442694  | -22.8321152 | -2.06328225 | -6.98438597 | -1.66141558 | -1.45193088 | -2.02024031 | -0.79145783 | -10.0440063 | -15.0870419 | -3.75329014 | -2.04176128 | 7.27591403 |
| 22                   | -8.0440073  | -9.93608856 | -1.59830153 | 0.50441724  | -0.71056527 | 1.99419701  | 2.35084462  | -3.07879758 | 0.35004729  | 1.32379317  | 3.77330494  | 1.53948712  | 1.03346002  | 7.39619923  | 10.2453527  | 8.57189178  | 0.98220218  | 1.1786266   | 5.31031551 |
| 23                   | -1.88743091 | -1.67029071 | 7.57208586  | 9.41315937  | 8.88598537  | 12.0555811  | 12.6451387  | 10.2606926  | 10.6656065  | 10.9822845  | 13.3810482  | 12.9089298  | 12.7280579  | 8.51977062  | 12.0794182  | 14.0559483  | 9.53724909  | 10.8239455  | 4.79277334 |
| 24                   | -12.1597099 | -7.55633545 | -3.87603951 | -0.86219269 | -0.94531852 | 6.12839174  | 4.54522514  | 2.63848019  | 4.93561268  | 9.45794487  | 3.78248692  | 9.44107819  | 5.71592045  | 8.65086651  | 8.02431107  | 1.13429689  | 2.44093866  | 4.16385603  | 6.22845064 |
| 25                   | -1.82435966 | -5.92930937 | -6.15255737 | -0.18195325 | 0.63241416  | -3.53069091 | -2.88048005 | -11.809824  | -10.0868769 | -5.86739206 | -12.3232975 | 3.21895313  | -9.80527973 | -14.9025774 | -13.797739  | 3.23127937  | -5.75060566 | -5.89835072 | 5.91800215 |
| 26                   | -6.47E+00   | -7.99E+00   | -0.85575294 | -0.00695932 | 1.63E-01    | 4.58E+00    | -0.54866964 | -5.73161554 | 2.24E+00    | 0.56159008  | 0.90929455  | 2.87580204  | 0.05635054  | -0.24996771 | -1.8881501  | 1.36E+00    | -0.68654186 | 0.02469561  | 3.39612347 |
| 27                   | -6.27233315 | -6.24E+00   | -0.07551601 | -0.70986933 | 1.14336026  | 3.62080455  | 5.11427736  | 4.65574598  | 2.9733305   | 4.14111042  | 6.34775114  | 1.43251765  | 7.85441589  | 8.58474636  | 5.14613008  | 4.50881815  | 2.63884317  | 3.88095748  | 4.32209498 |
| 28                   | -0.80488837 | -6.81229925 | -8.63229084 | -1.54859662 | -2.685112   | -3.27519584 | 1.13435757  | -3.82959199 | 0.76116145  | -0.08756351 | -6.12591887 | -4.39549303 | -3.94569945 | -13.3445101 | -19.289917  | -15.5248051 | -5.52539768 | -3.88764572 | 5.96421588 |
| 29                   | -16.894846  | -13.3657598 | 0.28944337  | 0.7379421   | -0.51290751 | 3.4395628   | 7.61659241  | 5.66912031  | 4.65125084  | 4.46445656  | 8.54692173  | 10.0509806  | 8.08504486  | 4.71634197  | 6.08682775  | 8.07174873  | 2.60329504  | 4.68379641  | 7.58933665 |
| 30                   | -4.9942894  | -3.33932519 | -7.44939661 | -1.24170017 | -4.8221755  | -7.66706657 | -10.3299198 | -8.28412819 | -3.9398582  | -0.09737493 | -5.43146658 | -14.7977657 | -5.02954721 | -3.69292855 | -5.74621344 | -7.03423977 | -5.86858724 | -5.2305069  | 3.51089568 |
| 31                   | -12.3722095 | -11.9782419 | -2.81251359 | -5.33224821 | -1.72186279 | 4.01051903  | -1.23033094 | -14.2796021 | 0.42096552  | 0.34363517  | -0.48890334 | -1.91861737 | 5.03828859  | 4.00772953  | 5.75972891  | 2.61806703  | -1.87097475 | -0.85961714 | 6.25590093 |
| 32                   | -5.31331444 | -6.12545013 | 3.66E-01    | 2.84E+00    | 3.34E+00    | 5.46E+00    | 5.05E+00    | -5.61E+00   | 5.10E+00    | 4.65E+00    | 5.029109    | 2.71951056  | 3.95E+00    | 4.09372473  | 3.19E+00    | -7.20E-01   | 1.75122321  | 3.26597631  | 4.05101092 |
| 33                   | -10.2015038 | -15.2269716 | -9.97010517 | -8.25758553 | -7.47231865 | -5.74958754 | -8.77241039 | -12.2962408 | -7.39828444 | -8.8841114  | -13.9705791 | -15.1362553 | -17.0961704 | -22.6811409 | -23.6505871 | 2.03773403  | -11.5453824 | -10.0858045 | 6.408305   |
| 34                   | -11.4667883 | -14.4439564 | -0.78411388 | -1.26916051 | -1.8743391  | 8.03050137  | 5.28429174  | 0.4609454   | 2.88147855  | 6.8210907   | 7.63688517  | 6.53667307  | 7.30368185  | 3.62426543  | 8.59906673  | 5.08526039  | 2.02661139  | 4.35476291  | 6.80650551 |
