# Supplementary material
Source: Frontiers journal article supplement (https://www.frontiersin.org/articles/318948)
Supplement: Data_Sheet_1.ZIP [file Data_Sheet_1.ZIP]

**g.LADYbird (tasks: 0-back, stop)****frontal theta**

| Vp | Task      | Fp1      | Fp2      | F3       | Fz       | F4       | mean     | median   | std      |
|----|-----------|----------|----------|----------|----------|----------|----------|----------|----------|
|    | 11 0-back | 17.68937 | 18.30141 | 15.17517 | 14.70421 | 11.62771 | 15.49957 | 15.17517 | 2.663391 |
|    | 12 0-back | 37.23883 | 35.66272 | 27.52551 | 24.12468 | 26.4021  | 30.19077 | 27.52551 | 5.870956 |
|    | 13 0-back | 25.42738 | 26.49053 | 17.80268 | 19.00671 | 15.66015 | 20.87749 | 19.00671 | 4.805796 |
|    | 14 0-back | 21.75031 | 20.05205 | 28.03905 | 33.10713 | 29.33894 | 26.4575  | 28.03905 | 5.436197 |
|    | 15 0-back | 38.37296 | 37.72552 | 35.67485 | 35.26585 | 35.18262 | 36.44436 | 35.67485 | 1.494482 |
|    | 16 0-back | 25.61881 | 25.8597  | 26.50123 | 26.87947 | 25.58827 | 26.0895  | 25.8597  | 0.574275 |
|    | 17 0-back | 24.94499 | 24.63484 | 21.66802 | 22.08222 | 21.53317 | 22.97265 | 22.08222 | 1.674816 |
|    | 18 0-back | 22.64536 | 22.71872 | 30.04846 | 30.4428  | 31.0275  | 27.37657 | 30.04846 | 4.299708 |
|    | 19 0-back | 27.91228 | 30.18171 | 21.36089 | 22.3824  | 21.41219 | 24.64989 | 22.3824  | 4.113573 |
|    | 20 0-back | 27.80437 | 24.32193 | 35.11394 | 35.33458 | 33.04494 | 31.12395 | 33.04494 | 4.863812 |
|    | 21 0-back | 23.04645 | 23.22164 | 28.92373 | 29.16703 | 23.73606 | 25.61898 | 23.73606 | 3.139294 |
|    | 22 0-back | 18.74029 | 28.4342  | 20.393   | 21.79683 | 22.14147 | 22.30116 | 21.79683 | 3.681539 |
|    | 23 0-back | 24.19005 | 21.97246 | 28.15466 | 30.73015 | 29.50406 | 26.91028 | 28.15466 | 3.696259 |
|    | 24 0-back | 32.83985 | 25.26378 | 52.54901 | 32.00501 | 29.49112 | 34.42975 | 32.00501 | 10.54893 |
|    | 25 0-back | 17.04824 | 16.64429 | 21.17324 | 22.66374 | 20.99105 | 19.70411 | 20.99105 | 2.692123 |
|    | 26 0-back | 43.84347 | 41.72622 | 34.08722 | 32.77192 | 31.10383 | 36.70653 | 34.08722 | 5.697928 |
|    | 27 0-back | 42.99739 | 42.339   | 32.50265 | 34.12219 | 32.44018 | 36.88028 | 34.12219 | 5.331553 |
|    | 28 0-back | 33.62002 | 28.40525 | 26.19999 | 25.89805 | 21.12933 | 27.05053 | 26.19999 | 4.530609 |
|    | 29 0-back | 39.10884 | 38.18865 | 26.87061 | 23.60552 | 25.34223 | 30.62317 | 26.87061 | 7.423956 |
|    | 30 0-back | 24.07825 | 25.90582 | 24.51084 | 25.41638 | 24.19449 | 24.82116 | 24.51084 | 0.801828 |
|    | 31 0-back | 34.18825 | 26.40982 | 28.82482 | 28.7305  | 24.5032  | 28.53132 | 28.7305  | 3.63501  |
|    | 32 0-back | 41.60654 | 41.08445 | 25.51866 | 33.22766 | 32.38689 | 34.76484 | 33.22766 | 6.712967 |
|    | 33 0-back | 28.90449 | 28.51003 | 31.0042  | 32.55483 | 30.49714 | 30.29414 | 30.49714 | 1.640908 |
|    | 34 0-back | 35.41067 | 35.71764 | 33.91681 | 34.51263 | 35.02083 | 34.91572 | 35.02083 | 0.717531 |
|    | 11 stop   | 19.82224 | 19.35155 | 14.33391 | 18.05855 | 14.10609 | 17.13447 | 18.05855 | 2.738965 |
|    | 12 stop   | 35.79916 | 34.40842 | 28.95018 | 26.48051 | 27.31587 | 30.59083 | 28.95018 | 4.243008 |
|    | 13 stop   | 28.03556 | 28.60827 | 25.23787 | 27.69185 | 22.21858 | 26.35843 | 27.69185 | 2.647952 |
|    | 14 stop   | 25.89337 | 25.22469 | 27.12259 | 29.75577 | 26.99228 | 26.99774 | 26.99228 | 1.731017 |
|    | 15 stop   | 47.74786 | 47.34632 | 42.67222 | 41.62884 | 39.80214 | 43.83948 | 42.67222 | 3.539878 |

|         |          |          |          |          |          |          |          |          |
|---------|----------|----------|----------|----------|----------|----------|----------|----------|
| 16 stop | 25.23236 | 24.96567 | 27.71855 | 28.41579 | 26.33981 | 26.53444 | 26.33981 | 1.511285 |
| 17 stop | 35.93129 | 35.42223 | 28.18122 | 27.93263 | 25.62936 | 30.61935 | 28.18122 | 4.726185 |
| 18 stop | 31.37593 | 31.78072 | 31.29836 | 31.2138  | 30.86486 | 31.30673 | 31.29836 | 0.329167 |
| 19 stop | 39.14324 | 40.86986 | 28.83171 | 29.32443 | 27.80319 | 33.19448 | 29.32443 | 6.272485 |
| 20 stop | 31.27857 | 26.50655 | 39.26008 | 40.00297 | 37.4414  | 34.89792 | 37.4414  | 5.81107  |
| 21 stop | 27.52926 | 27.404   | 28.77489 | 30.31722 | 25.18961 | 27.843   | 27.52926 | 1.892206 |
| 22 stop | 24.1777  | 29.36391 | 24.00946 | 27.39584 | 27.42006 | 26.47339 | 27.39584 | 2.315348 |
| 23 stop | 24.32377 | 20.10674 | 26.37607 | 29.12934 | 28.12787 | 25.61276 | 26.37607 | 3.579543 |
| 24 stop | 30.48498 | 25.93311 | 13.41161 | 30.6778  | 28.51549 | 25.8046  | 28.51549 | 7.186892 |
| 25 stop | 27.16858 | 20.49394 | 27.46257 | 28.52834 | 27.21514 | 26.17371 | 27.21514 | 3.222558 |
| 26 stop | 42.21741 | 42.38026 | 35.61758 | 34.84229 | 34.54241 | 37.91999 | 35.61758 | 4.016939 |
| 27 stop | 32.62617 | 31.32174 | 30.42506 | 30.79    | 30.05517 | 31.04363 | 30.79    | 1.000725 |
| 28 stop | 24.85548 | 24.61893 | 23.16018 | 23.85133 | 22.04389 | 23.70596 | 23.85133 | 1.144159 |
| 29 stop | 40.71993 | 40.66311 | 32.54378 | 30.42788 | 31.77185 | 35.22531 | 32.54378 | 5.0471   |
| 30 stop | 27.25821 | 26.94191 | 22.5457  | 22.62372 | 23.23475 | 24.52086 | 23.23475 | 2.372185 |
| 31 stop | 35.86692 | 28.99096 | 32.41992 | 31.49751 | 27.67188 | 31.28944 | 31.49751 | 3.187646 |
| 32 stop | 36.57776 | 36.15659 | 26.30905 | 31.64515 | 31.25123 | 32.38796 | 31.64515 | 4.199825 |
| 33 stop | 24.57566 | 24.01095 | 27.86492 | 29.48961 | 26.55269 | 26.49876 | 26.55269 | 2.274972 |
| 34 stop | 33.20451 | 33.99386 | 34.34715 | 35.22794 | 34.81356 | 34.3174  | 34.34715 | 0.777712 |
