# Supplementary material
Source: Frontiers journal article supplement (https://www.frontiersin.org/articles/318948)
Supplement: Data_Sheet_1.ZIP [file Data_Sheet_1.ZIP]

| Trilobite (all tasks) |              |             |             |             |             |             |             |             |             |             |             |             |             |             |              |             |             |             |             |             |             |             |             |             |             |             |              |             |             |             |             |             |             |             |             |            |
|-----------------------|--------------|-------------|-------------|-------------|-------------|-------------|-------------|-------------|-------------|-------------|-------------|-------------|-------------|-------------|--------------|-------------|-------------|-------------|-------------|-------------|-------------|-------------|-------------|-------------|-------------|-------------|--------------|-------------|-------------|-------------|-------------|-------------|-------------|-------------|-------------|------------|
| SNR [dB]              |              |             |             |             |             |             |             |             |             |             |             |             |             |             |              |             |             |             |             |             |             |             |             |             |             |             |              |             |             |             |             |             |             |             |             |            |
| Vp                    | Fp2          | Fp1         | Af4         | Af3         | F8          | F4          | Fz          | F3          | F7          | Ff8         | Fc4         | Fc2         | Fc3         | Ff7         | T8           | C4          | CP4         | CP2         | CP3         | TP7         | P8          | P4          | Pz          | P3          | P7          | O2          | Oz           | O1          | mean        | median      | std         |             |             |             |             |            |
| 1                     | -7.83365202  | -6.47225523 | -16.4812546 | -15.1507664 | -10.3962421 | -10.0218477 | -16.3380536 | -8.22752857 | -14.5082445 | -17.4669628 | -9.2888596  | -18.3391075 | -5.54660892 | -12.4407091 | -19.8857822  | -12.7086396 | -18.4346027 | -11.3173265 | -12.7047863 | -4.05980349 | -15.4794245 | -10.1201278 | -13.0619516 | -14.2037867 | -7.6045928  | -10.8339128 | -14.24884293 | -16.9373569 | -17.7966824 | -18.1969585 | -13.1758457 | -13.1211448 | 4.41110257  |             |             |            |
| 2                     | -3.51140714  | -8.0106745  | 9.7910091   | -10.362958  | -11.1728716 | 8.14314461  | -16.3819561 | -5.4380068  | -9.6307815  | -11.5208464 | -7.88668631 | -16.8871517 | -5.0848421  | -15.6735502 | -18.4437560  | -14.5457973 | -10.0625954 | -17.2115822 | -7.67919397 | -13.8641026 | -8.29639912 | -17.1170891 | -10.8620796 | -8.44088755 | -9.98054695 | -8.5802227  | -15.3176746  | -11.3667975 | -10.8625588 | 4.1846958   |             |             |             |             |             |            |
| 3                     | -7.9099865   | -6.97402573 | -7.1538823  | -5.13695288 | -10.8667049 | 8.17712975  | -16.2648964 | -6.79062033 | -10.7717781 | -15.2648964 | -8.08274651 | -9.7855463  | -10.3127174 | -13.4233294 | -15.3841972  | -6.82210655 | -7.79877949 | -13.7165737 | -12.5202065 | -12.7959337 | -16.2297996 | -13.5687971 | -12.4204702 | -14.0799084 | -14.1215611 | -12.5499144 | -14.2265348  | -11.3463621 | -13.7440405 | -14.4573736 | -12.8411074 | -13.0305061 | -14.8135777 | -11.5911711 | -12.5350604 | 3.01959191 |
| 4                     | 0.09573147   | -3.10043979 | -13.3958464 | -16.7952671 | -13.0666008 | 8.16183567  | -13.1346054 | -13.5934248 | -12.9697962 | -14.7307987 | -11.0635309 | -12.0426588 | -13.8453922 | -11.4275703 | -13.9102392  | -12.8333511 | -12.6697721 | -10.9669352 | -5.61155367 | -14.4186792 | -11.5215082 | -11.6199026 | -8.80284691 | -9.39030552 | -20.9722939 | -4.31603527 | -8.92726707  | -9.42819786 | -16.9507122 | -8.2571497  | -5.93065643 | -11.1327019 | -11.0903795 | -11.5707054 | 4.2484211   |            |
| 5                     | -6.638609    | -7.35663605 | -17.0025177 | -14.7821579 | -17.2758045 | -7.70612335 | -11.51929   | -19.6923332 | -12.7742271 | -18.274725  | -8.9622878  | -11.5675821 | -6.12149715 | -16.1065712 | -18.307476   | -8.82346725 | -10.7330301 | -11.271553  | -9.59088993 | -12.4086456 | -7.51484108 | -8.98310661 | -15.6352692 | -12.4194212 | -15.6778148 | -10.788147  | -8.6585083   | -14.0139208 | -15.7707748 | -12.480176  | -9.6465113  | -15.9537067 | -12.3263641 | -11.9881139 | 1.82085431  |            |
| 7                     | -7.84554853  | -11.1239061 | -12.031744  | -12.8126879 | -19.0449238 | -6.01007795 | -11.0177164 | -5.94672489 | -17.5899181 | -18.9581013 | -9.06015778 | -11.6073694 | -5.85658979 | -7.05196428 | -21.8672114  | -16.5797195 | -13.970721  | -13.4304028 | -20.753973  | -7.66430683 | -9.53992271 | -19.8598537 | -16.6316681 | -11.64711   | -7.18102932 | -8.04566697 | -10.8398533  | -16.7471428 | -17.1133701 | -5.96149254 | -19.3346291 | -12.9553464 | -12.422159  | 5.08648652  |             |            |
| 8                     | -14.524785   | -10.3674431 | -11.6683826 | -13.7807121 | -10.4853868 | -30.5548611 | -13.1869459 | -30.4999733 | -6.74642467 | -15.3336649 | -18.759613  | -10.8586559 | -4.83816376 | -7.83460426 | -12.4282446  | -12.2382154 | -7.28449535 | -11.5309801 | -8.38349533 | -13.9371614 | -8.2538813  | -7.35344076 | -13.992363  | -11.3315849 | -2.52184606 | -20.2077904 | -6.44224453  | -25.9089394 | -13.0180931 | -11.8338556 | -9.80943489 | -12.5445499 | -12.5422825 | -11.5996814 | 6.64154027  |            |
| 9                     | -9.81309795  | -7.6278019  | -10.4850054 | -7.91546059 | -4.4833202  | -6.7920084  | -11.2554989 | -6.13866472 | -14.0854864 | -8.01048088 | -9.01411819 | -10.8872976 | -13.5668669 | -13.8749447 | -12.9340315  | -14.6306114 | -9.9601202  | -10.4523048 | -14.8275461 | -14.7316904 | -12.1116505 | -9.93283463 | -12.8916311 | -14.2220297 | -14.3861799 | -12.1388025 | -9.0369072   | -13.0300531 | -9.84506989 | -9.29810047 | -4.24812269 | -9.30353451 | -10.6853836 | -10.4686551 | 2.99012836  |            |
| 10                    | -6.89356947  | -7.24871302 | -10.5123167 | -10.6045904 | -10.4826975 | -8.95375156 | -5.50650024 | -6.90064573 | -13.5615807 | -8.04177284 | -9.80895748 | -11.9667902 | -8.24196625 | -6.32644115 | -8.33427525  | -12.2775974 | -11.976491  | -14.2778816 | -13.8615198 | -11.8131733 | -13.9119549 | -13.9591093 | -14.1398897 | -12.658021  | -9.991436   | -13.3492918 | -7.20288515  | -7.23187113 | -6.778633   | -10.4425498 | -10.5584536 | 2.65850542  |             |             |             |            |
| 11                    | -6.07002258  | -8.36874204 | -13.099782  | -11.9477978 | -14.9500093 | -10.6477728 | -10.0028057 | -9.2381723  | -14.8306475 | -14.445775  | -12.5339973 | -14.409831  | -15.4676771 | -9.98948002 | -9.28853035  | -15.572258  | -15.231595  | -16.1657658 | -17.7307873 | -17.7206783 | -30.3921291 | -14.7489042 | -16.3189735 | -17.8540058 | -18.7022114 | -17.7373028 | -13.7280455  | -15.3380809 | -17.3348525 | -9.36907578 | -12.2890766 | -8.81415939 | -14.0716166 | -14.5973396 | 4.47145745  |            |
| 12                    | -5.06424284  | -4.30541945 | -11.616086  | -17.3911705 | -13.5752563 | -11.5558589 | -16.8308487 | -16.4642048 | -12.6190481 | -10.0252266 | -8.62376595 | -7.39950323 | -12.6888199 | -14.1641483 | -11.8944323  | -13.4612856 | -6.00464058 | -11.1719227 | -12.585887  | -7.32189703 | -11.4461012 | -8.78564167 | -11.2531633 | -11.8054676 | -10.5595875 | -8.24568558 | -8.72515011  | -10.8591175 | -8.84495068 | -7.8062849  | -6.00917578 | -6.5256381  | -10.49148   | -11.0155201 | 3.3813213   |            |
| 13                    | -2.78704691  | -3.33189201 | -8.93942165 | -5.29657412 | -12.8994341 | -6.62537336 | -8.60368252 | -13.4308653 | -8.44043922 | -13.1446018 | -11.0629196 | -12.7756319 | -13.7601442 | -8.84579754 | -13.4929962  | -14.2375698 | -10.0047913 | -13.8508091 | -9.27089024 | -15.2175531 | -13.0613518 | -11.7068529 | -13.5063581 | -14.4859991 | -14.0460186 | -11.2756023 | -13.3366833  | -12.6935463 | -13.008215  | -6.73421907 | -5.40986967 | -8.76841164 | -10.7203613 | -11.5217681 | 3.40111463  |            |
| 14                    | -4.63518381  | -5.2424736  | -13.7224035 | -14.8418989 | -14.1140337 | -7.26363754 | -10.475688  | -15.3298254 | -15.7494936 | -11.0247726 | -10.0994051 | -13.601512  | -15.0090080 | -14.4295883 | -10.7013655  | -8.29561138 | -12.4935303 | -8.13219261 | -14.339028  | -15.2985754 | -3.57548022 | -11.643342  | -11.4857893 | -11.6597271 | -16.0434914 | -12.4474945 | -10.7697897  | -14.4120483 | -10.0057983 | -9.02800083 | -7.42854455 | -11.8165894 | -11.4039167 | -11.6515346 | 3.36966657  |            |
| 15                    | -4.86068773  | -5.25221236 | -11.5807123 | -8.00332114 | -11.5048618 | -9.69295551 | -8.40864033 | -9.96677399 | -12.3444052 | -11.4451004 | -9.86595827 | -9.48409653 | -13.7942232 | -13.8401937 | -16.40486948 | -13.1715336 | -7.75517988 | -13.221488  | -14.7339351 | -14.302742  | -13.7340841 | -11.2427839 | -13.9676371 | -14.2608889 | -14.4938307 | -12.74016   | -8.80264759  | -13.783161  | -11.2705533 | -5.9420091  | -6.1224713  | -7.0158855  | -10.725217  | -11.3939872 | 3.07590024  |            |
| 16                    | -4.43788147  | -3.6148479  | -6.5694466  | -14.9289646 | -11.2826271 | -11.9035034 | -13.8418627 | -14.8695408 | -17.0395622 | -15.4525258 | -13.1955652 | -15.5638437 | -14.7306567 | -18.7262802 | -10.2766228  | -11.6440201 | -10.6592636 | -8.55755424 | -11.9114304 | -10.4155445 | -18.6380978 | -13.0204973 | -10.4155445 | -18.6380978 | -13.0204973 | -10.4155445 | -18.6380978  | -16.6175556 | -12.7189817 | -12.248518  | -3.81631353 | -14.2915926 | -12.5105021 | -13.1003313 | 3.98041128  |            |
| 18                    | -12.15409567 | -11.0182924 | -10.5197515 | -12.7944088 | -14.0817461 | -11.240942  | -11.9561691 | -13.4786491 | -11.3345308 | -15.4809341 | -9.11260223 | -14.7118616 | -6.88565528 | -12.7794104 | -10.2629337  | -8.3506155  | -12.5774975 | -9.52590752 | -10.4546232 | -14.0223989 | -12.3209915 | -11.9092569 | -9.67386341 | -12.956708  | -8.2958765  | -6.9473772  | -9.97782803  | -10.2249832 | -6.32687521 | -7.10518932 | -5.1258206  | -13.1157484 | -10.8351079 | -11.1296172 | 2.59862625  |            |
| 20                    | -9.78335667  | -15.3133287 | -16.2734947 | -17.3226852 | -10.1045237 | -9.64521694 | -18.0828438 | -7.93822289 | -9.06477642 | -18.5110455 | -9.04518986 | -16.493309  | -9.10536671 | -8.05531597 | -16.207552   | -9.1407423  | -16.0371532 | -16.4852142 | -6.40364361 | -9.66732788 | -16.2201614 | -11.011941  | -16.6475258 | -9.48532295 | -16.2012157 | -17.1739502 | -8.16856575  | -13.8443432 | -16.4662495 | -15.75424   | -6.90654612 | -14.8734293 | -12.8573063 | -14.3588862 | 3.94306173  |            |
| 21                    | -14.2161353  | -10.0832673 | -4.80448818 | -1.45810354 | -17.4220184 | -6.35865974 | -6.01377821 | -4.73741007 | -13.2097473 | -6.17568302 | -11.7317877 | -20.3514824 | -7.58375216 | -8.97799301 | -6.56191111  | -11.681807  | -6.78774261 | -4.81367636 | -8.3013792  | -14.7334996 | -14.7011766 | -5.53624725 | -4.78941298 | -8.54975891 | -6.9118886  | -2.5093441  | -2.66076174  | -7.25777149 | -8.83680916 | -6.83325005 | -3.78391171 | -2.70243216 | -7.78650825 | -8.81049613 | 4.36640978  |            |
| 33                    | -1.73365331  | -2.10548282 | -16.2890778 | -2.44048762 | -27.6831722 | -1.72955739 | -2.57707453 | -18.0206989 | -16.5110073 | -11.9936714 | -13.8199415 | -3.65491199 | -29.9337006 | -16.4573517 | -7.38677359  | -13.8511382 | -3.65045428 | -8.30620965 | -2.59814715 | -9.83742523 | -20.6177593 | -2.7533405  | -8.51809883 | -2.31508756 | -5.61258411 | -9.11425018 | -5.6955452   | -7.87166266 | -21.4406738 | -5.5407811  | -9.17924404 | -5.72765255 | -9.84284625 | -8.08898115 | 7.67512997  |            |
| 34                    | -9.76325989  | -9.08705711 | -11.4396324 | -13.7656822 | -14.3396348 | -3.42493033 | -10.8189001 | -6.76898861 | -16.027483  | -9.20085239 | -10.1209459 | -12.5623674 | -12.6161489 | -14.4435663 | -9.5209856   | -11.8797636 | -15.5026827 | -11.0557356 | -4.50192165 | -13.7307329 | -8.81929684 | -10.7155647 | -8.22753048 | -13.004056  | -14.873291  | -13.5553675 | -10.7310247  | -13.9225082 | -12.9036875 | -11.8655659 | -10.2190866 | -6.96162682 | -11.124604  | -11.247684  | 3.06887353  |            |
