# Supplementary material
Source: Frontiers journal article supplement (https://www.frontiersin.org/articles/318948)
Supplement: Data_Sheet_1.ZIP [file Data_Sheet_1.ZIP]

| EPOC (all tasks) |             |             |             |             |             |             |             |             |             |             |             |             |             |             |             |             |            |
|------------------|-------------|-------------|-------------|-------------|-------------|-------------|-------------|-------------|-------------|-------------|-------------|-------------|-------------|-------------|-------------|-------------|------------|
| SNR [dB]         |             |             |             |             |             |             |             |             |             |             |             |             |             |             |             |             |            |
| Vp               | AF3         | F7          | F3          | FC5         | T7          | P7          | O1          | O2          | P8          | T8          | FC6         | F4          | F8          | AF4         | mean        | median      | std        |
| 11               | -16.1016788 | -12.9653826 | -12.9286718 | -11.4568529 | -9.33341503 | -13.9515848 | -15.0451593 | -12.7419472 | -10.7100515 | -12.358675  | -11.4573059 | -12.1662512 | -12.9817486 | -13.6327343 | -12.7022471 | -12.8353095 | 1.7208299  |
| 12               | -16.5030212 | -15.9054918 | -16.356741  | -15.2285261 | -17.1537285 | -15.7019806 | -16.3880844 | -15.056778  | -13.0548763 | -13.5245142 | -14.9834213 | -15.8364687 | -15.3335762 | -15.8879328 | -15.4939387 | -15.7692246 | 1.11554902 |
| 13               | -8.991436   | -9.11595821 | -9.15710258 | -7.52406073 | -8.44445229 | -8.29765987 | -8.86903477 | -8.9949522  | -8.16165638 | -8.95127201 | -8.13293171 | -9.12242603 | -8.8810873  | -9.09167767 | -8.6954077  | -8.91617966 | 0.49856365 |
| 14               | -15.6275606 | -17.5226612 | -29.8780079 | -17.318964  | -19.1540451 | -20.1666737 | -18.2174072 | -16.7146893 | -15.1635675 | -14.9653301 | -14.8322262 | -15.6505089 | -15.5763931 | -14.560626  | -17.5249069 | -16.1825991 | 3.9466169  |
| 15               | -21.3243828 | -20.5588093 | -18.8073921 | -19.4041882 | -18.5918903 | -19.1499596 | -19.3220444 | -12.617959  | -13.3811607 | -12.3565178 | -16.8182983 | -17.4905148 | -18.0297775 | -19.9708405 | -17.7016954 | -18.6996412 | 2.91002803 |
| 16               | 0.98570663  | 3.44664931  | -12.2658653 | 3.79401016  | 4.22528601  | 3.14983582  | 3.69411016  | 3.26102662  | 0.84601218  | 4.62686634  | 1.6716094   | 1.26119876  | 3.13518333  | 3.97268271  | 1.84316515  | 3.20543122  | 4.24545666 |
| 17               | 10.0097752  | 9.72275829  | 9.37034988  | -11.3078632 | 9.73983479  | 10.2542839  | 6.70847368  | 9.3965292   | 10.2824507  | 9.85917377  | 9.85807896  | 9.67409897  | 9.42320251  | 9.81690693  | 8.05771811  | 9.73129654  | 5.6405597  |
| 18               | -12.6820221 | -13.3996973 | -12.4084959 | -13.8128757 | -20.1847878 | -15.3897915 | -14.0258598 | -10.2914867 | -10.95751   | -11.9795399 | -12.2517929 | -11.7722521 | -12.5719843 | -11.8026886 | -13.1093418 | -12.4902401 | 2.41345394 |
| 19               | 3.79857302  | 4.9663105   | 2.68540692  | -13.9565067 | -1.81017041 | -4.11412096 | 3.50519228  | 3.52496672  | 5.61237288  | 3.73198962  | -9.80327892 | -6.15507746 | 4.10295391  | 5.5311799   | 0.11569938  | 3.5150795   | 6.27975908 |
| 20               | -13.7491159 | -12.3068972 | -8.46158981 | -18.8951588 | -19.9626923 | -25.3439217 | -28.0787487 | -13.2378979 | 12.0160465  | -10.3094864 | -25.9474277 | -20.5237122 | -13.2977629 | -12.9336777 | -15.0737173 | -13.5234394 | 9.92991116 |
| 21               | -15.1705303 | -15.1069326 | -16.3033791 | -13.8571053 | -15.4955845 | -16.5770187 | -16.3558083 | -15.1908941 | -10.2115965 | -12.7568541 | -13.6934366 | -14.3545351 | -14.5628366 | -14.8457355 | -14.6058748 | -14.9763341 | 1.65894401 |
| 22               | -14.7048473 | -17.7552872 | -17.9824657 | -18.2199898 | -20.1810341 | -23.3833885 | -18.6193008 | -17.1698437 | -18.2568798 | -15.3736591 | -18.1754971 | -17.3525581 | -17.2314129 | -17.3714008 | -17.9841118 | -17.8688765 | 2.04136183 |
| 23               | -17.1997643 | -13.4161196 | -22.291153  | -28.4266834 | -22.3519173 | -16.7435017 | -28.4026756 | -30.4451675 | -27.559557  | -15.3316832 | -29.9118271 | -29.9776115 | -16.391655  | -15.1408758 | -22.3992994 | -22.3215351 | 6.54020349 |
| 24               | -15.3920126 | -17.6355839 | -19.8119812 | -19.1107559 | -15.1155844 | -20.1896038 | -18.2713184 | -16.9846077 | -21.5123806 | -15.0421944 | -15.4994259 | -16.8092899 | -18.1902676 | -12.0069189 | -17.2551375 | -17.3100958 | 2.52086889 |
| 25               | -17.9193535 | -16.2181702 | -18.6958084 | -19.9981709 | -19.1972599 | -21.086319  | -28.0460587 | -29.1215076 | -19.4802494 | -15.2477398 | -21.9727345 | -19.1713085 | -17.2721977 | -17.0721359 | -20.0356439 | -19.1842842 | 4.05278369 |
| 26               | -15.0116301 | -13.2839289 | -14.1648903 | -16.4248962 | -19.8518906 | -17.2102089 | -29.1250534 | -13.3489771 | -11.4893942 | -11.7674055 | -29.8859329 | -13.2148981 | -12.261095  | -12.5018978 | -16.3958642 | -13.7569337 | 6.01509163 |
| 27               | 0.40850022  | 0.28888634  | 0.39301825  | 0.94289589  | 0.54418868  | 1.7111069   | 0.87575501  | 1.2626847   | 1.40202427  | 0.64988005  | 0.39496201  | 0.5910511   | 0.26501736  | 0.66268361  | 0.74233246  | 0.62046558  | 0.44437709 |
| 28               | -12.5164423 | -14.6559515 | -15.4871807 | -15.0418825 | -17.5705872 | -16.4639759 | -17.6176434 | -15.1802826 | -13.7679911 | -12.3499174 | -14.7370453 | -18.1275978 | -14.6558514 | -13.5538111 | -15.1232971 | -14.8894639 | 1.80916676 |
| 29               | -16.8266811 | -17.6072979 | -23.2931118 | -15.2353468 | -17.1668835 | -16.0401249 | -12.4878206 | -8.66513538 | -7.75658321 | -11.4867096 | -14.1935492 | -14.3425999 | -15.9652319 | -15.9041586 | -14.7836596 | -15.5697527 | 3.90435084 |
| 30               | -12.8154554 | -15.262681  | -13.5068464 | -14.660675  | -15.8858204 | -17.1424294 | -17.7007084 | -14.0456734 | -13.1852369 | -13.4753246 | -13.1967258 | -12.7131948 | -13.5440865 | -11.6946459 | -14.2021074 | -13.5254664 | 1.73197534 |
| 31               | -18.2314796 | -19.1984806 | -19.2363605 | -17.3743286 | -17.0925751 | -18.0621357 | -19.68223   | -18.5735149 | -16.4654331 | -15.274128  | -16.1889591 | -17.4379864 | -16.9747734 | -17.3443432 | -17.6526234 | -17.4061575 | 1.25785776 |
| 32               | -15.8747053 | -17.058939  | -29.2508297 | -18.5332031 | -19.715435  | -19.593071  | -17.6772003 | -15.654583  | -15.1217051 | -14.0245371 | -14.7646561 | -18.3882675 | -15.5062218 | -14.3331318 | -17.5354633 | -16.4668221 | 3.87004811 |
| 33               | -12.9502831 | -15.7144089 | -18.389431  | -14.6845245 | -15.775835  | -20.7670135 | -30.0885334 | -28.6398792 | -28.3653927 | -15.6184282 | -28.4032078 | -30.0124931 | -16.7792492 | -14.5165224 | -20.7646573 | -17.5843401 | 6.71432881 |
| 34               | -16.429739  | -17.5942841 | -29.2999821 | -29.7502689 | -19.4316368 | -25.363039  | -19.573267  | -16.2886105 | -26.4937649 | -16.662281  | -28.8104992 | -16.9093552 | -16.657629  | -15.5171261 | -21.0558202 | -18.5129604 | 5.54201246 |
