# Supplementary material
Source: Frontiers journal article supplement (https://www.frontiersin.org/articles/318948)
Supplement: Data_Sheet_1.ZIP [file Data_Sheet_1.ZIP]

| EPOC (tasks: 0-back, stop) |           |          |          |          |          |          |          |          |          |          |
|----------------------------|-----------|----------|----------|----------|----------|----------|----------|----------|----------|----------|
| frontal theta              |           |          |          |          |          |          |          |          |          |          |
| Vp                         | Task      | AF3      | F7       | F3       | F4       | F8       | AF4      | mean     | median   | std      |
|                            | 11 0-back | 0.816242 | 0.251902 | 0.426415 | 0.577619 | 0.410873 | 0.364858 | 0.474651 | 0.418644 | 0.197663 |
|                            | 12 0-back | 18.00623 | 18.81789 | 20.39962 | 20.35345 | 15.10845 | 20.11433 | 18.8     | 19.46611 | 2.047311 |
|                            | 13 0-back | 47.05219 | 47.13997 | 47.05471 | 47.16796 | 47.1852  | 46.95082 | 47.09181 | 47.09734 | 0.089065 |
|                            | 14 0-back | 20.26465 | 23.0977  | 20.45203 | 23.52309 | 20.33198 | 17.97236 | 20.9403  | 20.392   | 2.059068 |
|                            | 15 0-back | 20.23653 | 19.39565 | 20.38887 | 20.3319  | 20.24827 | 20.0845  | 20.11429 | 20.2424  | 0.36687  |
|                            | 16 0-back | 0.250032 | 14.9458  | 0.058097 | 0.135617 | 14.84767 | 17.27353 | 7.918458 | 7.548849 | 8.556606 |
|                            | 17 0-back | 13.24051 | 13.24012 | 13.23858 | 13.23976 | 13.23768 | 13.24098 | 13.23961 | 13.23994 | 0.001244 |
|                            | 18 0-back | 13.20207 | 19.96745 | 20.48033 | 20.60532 | 20.14034 | 19.84562 | 19.04019 | 20.0539  | 2.87493  |
|                            | 19 0-back | 5.784466 | 5.47656  | 4.560986 | 5.762642 | 5.638501 | 5.411644 | 5.439133 | 5.55753  | 0.455403 |
|                            | 20 0-back | 1.013888 | 0.351944 | 4.060818 | 1.287166 | 1.842833 | 3.291666 | 1.974719 | 1.564999 | 1.423578 |
|                            | 21 0-back | 20.22529 | 9.097874 | 20.22848 | 20.25655 | 2.966931 | 20.18069 | 15.49264 | 20.20299 | 7.580042 |
|                            | 22 0-back | 19.40072 | 1.655493 | 17.5668  | 37.29463 | 0.549291 | 1.457417 | 12.98739 | 9.611145 | 14.62192 |
|                            | 23 0-back | 7.492115 | 18.35746 | 13.06186 | 20.45286 | 17.27827 | 11.82022 | 14.7438  | 15.17006 | 4.817439 |
|                            | 24 0-back | 16.43262 | 15.98233 | 14.56166 | 15.82756 | 16.33855 | 15.96376 | 15.85108 | 15.97304 | 0.673631 |
|                            | 25 0-back | 1.162035 | 0.914994 | 0.495969 | 0.563115 | 0.457252 | 0.736648 | 0.721669 | 0.649881 | 0.274779 |
|                            | 26 0-back | 20.70946 | 28.23402 | 29.40225 | 30.14126 | 27.69507 | 21.23918 | 26.23687 | 27.96455 | 4.169127 |
|                            | 27 0-back | 52.61388 | 52.42456 | 52.59457 | 53.06755 | 52.3457  | 53.22481 | 52.71184 | 52.60423 | 0.354853 |
|                            | 28 0-back | 21.44119 | 25.32426 | 19.55403 | 0.074161 | 3.458322 | 6.432697 | 12.71411 | 12.99336 | 10.64759 |
|                            | 29 0-back | 25.79729 | 24.75259 | 17.74802 | 18.76848 | 21.57069 | 24.33667 | 22.16229 | 22.95368 | 3.346774 |
|                            | 30 0-back | 48.23524 | 1.791955 | 17.20954 | 17.54005 | 6.239585 | 16.19532 | 17.86862 | 16.70243 | 16.24295 |
|                            | 31 0-back | 20.61823 | 20.12342 | 19.71238 | 21.20222 | 21.75342 | 19.39197 | 20.46694 | 20.37082 | 0.901275 |
|                            | 32 0-back | 21.36961 | 28.78558 | 20.4248  | 21.40966 | 19.41872 | 20.76649 | 22.02914 | 21.06805 | 3.389712 |
|                            | 33 0-back | 14.17373 | 15.77083 | 11.53426 | 20.42913 | 14.81562 | 15.56172 | 15.38088 | 15.18867 | 2.906643 |
|                            | 34 0-back | 19.17565 | 18.68816 | 20.42286 | 19.88598 | 19.92354 | 18.9956  | 19.5153  | 19.53081 | 0.662923 |
|                            | 11 stop   | 0.744215 | 0.44216  | 0.422687 | 0.568358 | 0.406465 | 0.724975 | 0.551477 | 0.505259 | 0.153036 |
|                            | 12 stop   | 20.09347 | 20.39261 | 20.23116 | 20.27324 | 17.55076 | 20.10309 | 19.77406 | 20.16713 | 1.094902 |
|                            | 13 stop   | 47.50257 | 47.51502 | 47.51119 | 47.51789 | 47.53746 | 47.51297 | 47.51618 | 47.514   | 0.01164  |
|                            | 14 stop   | 20.32765 | 20.34379 | 20.4562  | 20.40736 | 16.84622 | 20.27563 | 19.77614 | 20.33572 | 1.436748 |
|                            | 15 stop   | 22.54691 | 22.05167 | 22.70824 | 20.89782 | 21.11769 | 22.46046 | 21.9638  | 22.25607 | 0.774704 |

|         |          |          |          |          |          |          |          |          |          |
|---------|----------|----------|----------|----------|----------|----------|----------|----------|----------|
| 16 stop | 38.13107 | 37.5634  | 37.50271 | 37.69856 | 37.52671 | 37.58483 | 37.66788 | 37.57412 | 0.236858 |
| 17 stop | 26.16535 | 26.12967 | 26.2523  | 26.2101  | 25.98494 | 26.25967 | 26.16701 | 26.18772 | 0.102237 |
| 18 stop | 4.595172 | 12.36659 | 17.30882 | 18.97908 | 14.86081 | 13.39111 | 13.5836  | 14.12596 | 5.038447 |
| 19 stop | 35.8355  | 35.79705 | 35.82332 | 35.82824 | 35.81644 | 35.83093 | 35.82191 | 35.82578 | 0.013827 |
| 20 stop | 9.870545 | 3.425832 | 1.335657 | 23.06973 | 20.05672 | 19.86704 | 12.93759 | 14.86879 | 9.33643  |
| 21 stop | 14.9416  | 15.36042 | 14.45832 | 14.61849 | 12.91475 | 13.85522 | 14.35814 | 14.53841 | 0.867076 |
| 22 stop | 20.15408 | 20.33933 | 20.37649 | 20.40327 | 20.37884 | 20.38274 | 20.33912 | 20.37767 | 0.092986 |
| 23 stop | 0.462678 | 0.970852 | 20.43605 | 20.43694 | 11.97028 | 10.22612 | 10.75049 | 11.0982  | 8.841726 |
| 24 stop | 14.8349  | 15.02687 | 13.97323 | 13.39489 | 14.66946 | 13.80476 | 14.28402 | 14.32135 | 0.651261 |
| 25 stop | 50.63864 | 11.05961 | 67.30606 | 61.17088 | 20.08679 | 20.76934 | 38.50522 | 35.70399 | 24.07281 |
| 26 stop | 24.60919 | 23.42734 | 20.09604 | 22.80551 | 24.3697  | 27.72641 | 23.83903 | 23.89852 | 2.499364 |
| 27 stop | 46.83874 | 46.85515 | 46.82097 | 46.8533  | 46.84763 | 46.8846  | 46.85007 | 46.85047 | 0.021021 |
| 28 stop | 4.441057 | 14.88932 | 12.88077 | 0.671376 | 11.34629 | 4.469141 | 8.116325 | 7.907715 | 5.678783 |
| 29 stop | 30.98666 | 8.60649  | 20.4952  | 20.59101 | 23.78437 | 29.21626 | 22.28    | 22.18769 | 7.989791 |
| 30 stop | 13.92086 | 2.69214  | 15.0622  | 2.333894 | 4.158854 | 5.346315 | 7.252377 | 4.752585 | 5.721052 |
| 31 stop | 25.46541 | 25.08252 | 20.51381 | 20.43423 | 20.13779 | 22.5839  | 22.36961 | 21.54886 | 2.414975 |
| 32 stop | 22.67461 | 16.67345 | 7.413828 | 22.21552 | 20.58544 | 23.16767 | 18.78842 | 21.40048 | 6.051596 |
| 33 stop | 19.60756 | 17.44306 | 18.38443 | 20.49608 | 18.33378 | 18.67874 | 18.82394 | 18.53158 | 1.074381 |
| 34 stop | 5.437559 | 4.056694 | 20.4538  | 2.56674  | 5.342055 | 7.320978 | 7.529638 | 5.389807 | 6.52582  |
