# Supplementary material
Source: Frontiers journal article supplement (https://www.frontiersin.org/articles/318948)
Supplement: Data_Sheet_1.ZIP [file Data_Sheet_1.ZIP]

| BR8+ (all tasks)            |            |            |            |            |            |            |            |            |            |            |            |
|-----------------------------|------------|------------|------------|------------|------------|------------|------------|------------|------------|------------|------------|
| Proportion of artifacts [%] |            |            |            |            |            |            |            |            |            |            |            |
| Vp                          | Fp1        | Fp2        | Fz         | C3         | C4         | Pz         | O1         | O2         | mean       | median     | std        |
| 11                          | 84.0673895 | 15.8002789 | 18.9794466 | 99.9806114 | 99.9756666 | 99.9806114 | 49.2679027 | 52.5859994 | 65.0797383 | 68.3266944 | 35.805443  |
| 12                          | 9.16584849 | 9.79448858 | 64.4694964 | 12.7005191 | 18.6248931 | 68.443449  | 9.83170713 | 12.1933696 | 25.6529714 | 12.4469443 | 25.3819325 |
| 13                          | 99.9823785 | 99.9836246 | 5.58803264 | 99.9823785 | 99.9823785 | 80.5520944 | 26.2441552 | 27.8674761 | 67.5228148 | 90.2672365 | 40.5264059 |
| 14                          | 65.0611247 | 11.0070271 | 14.843504  | 25.9159865 | 99.9939404 | 99.9949313 | 28.6975044 | 51.1985747 | 49.5890741 | 39.9480395 | 35.8888713 |
| 15                          | 99.3500419 | 4.13918739 | 3.77186806 | 99.8920958 | 74.6705134 | 95.3090633 | 37.8344683 | 32.4997572 | 55.9333744 | 56.2524909 | 41.4023237 |
| 16                          | 59.9205724 | 2.50381911 | 4.07938711 | 99.9914104 | 99.9910557 | 99.9910557 | 99.9910557 | 99.9910557 | 70.8074265 | 99.9910557 | 43.9073365 |
| 17                          | 36.4240748 | 25.5989793 | 24.2708305 | 35.1571785 | 99.9908934 | 36.9694661 | 26.0772196 | 23.9224091 | 38.5513814 | 30.6171991 | 25.452119  |
| 18                          | 84.1848613 | 9.79429349 | 7.39765787 | 28.0453772 | 17.5149665 | 99.9938256 | 9.19856976 | 9.04238775 | 33.1464924 | 13.65463   | 37.2380097 |
| 19                          | 47.1328623 | 17.5447689 | 14.7895993 | 25.9104824 | 23.287637  | 99.9936652 | 13.9250407 | 14.5442328 | 32.1410361 | 20.416203  | 29.5236708 |
| 20                          | 76.9546635 | 18.406145  | 12.4952609 | 79.9752931 | 79.9752931 | 10.8305584 | 7.89584966 | 23.267127  | 38.7250238 | 20.836636  | 33.6643471 |
| 21                          | 79.9895888 | 79.9134089 | 4.07628643 | 79.9895888 | 4.25941614 | 5.07454843 | 2.92186676 | 3.16315623 | 32.4234826 | 4.66698229 | 39.3729719 |
| 22                          | 10.6152567 | 10.6725721 | 10.2320021 | 79.9782966 | 79.9782966 | 10.0552443 | 10.6265784 | 10.7008565 | 27.8573879 | 10.6495753 | 32.1705392 |
| 23                          | 13.7109053 | 8.63715464 | 6.93870428 | 6.74096364 | 99.9791521 | 99.9791521 | 99.9791521 | 99.9791521 | 54.493042  | 56.8450287 | 48.6732046 |
| 24                          | 29.0134254 | 11.9926049 | 8.80509553 | 99.8169404 | 11.5439157 | 99.9928588 | 99.9928588 | 99.9928588 | 57.6438198 | 64.4151829 | 45.6274517 |
| 25                          | 76.8162623 | 43.3582582 | 36.2414809 | 99.9940876 | 99.9940876 | 99.9940876 | 99.9940876 | 99.9940876 | 82.0483049 | 99.9940876 | 27.3412684 |
| 26                          | 93.3762454 | 12.9780564 | 30.2992672 | 99.9955025 | 99.9955025 | 64.5621422 | 30.4953875 | 30.8213846 | 57.815436  | 47.6917634 | 36.0772965 |
| 27                          | 14.0245463 | 19.1966415 | 13.7654385 | 71.4971348 | 36.3206268 | 99.9863662 | 49.5873959 | 48.7572714 | 44.1419277 | 42.5389491 | 30.3105144 |
| 28                          | 4.33710646 | 4.6086857  | 4.18616109 | 99.8922481 | 99.994601  | 79.6579965 | 4.57016677 | 4.98304486 | 37.7787513 | 4.79586528 | 46.3036516 |
| 29                          | 81.6182947 | 22.6734485 | 17.8144221 | 99.9813191 | 99.9813191 | 81.7796122 | 22.6385944 | 16.2417712 | 55.3410977 | 52.1458716 | 38.6349631 |
| 30                          | 87.4030832 | 20.0375214 | 40.3934606 | 39.0787815 | 57.5509405 | 99.9739322 | 85.659763  | 82.2517273 | 64.0436512 | 69.9013339 | 28.7767502 |
| 31                          | 3.54138696 | 3.56459953 | 99.9944233 | 99.9944233 | 99.9794901 | 3.82243641 | 4.0855158  | 99.9944233 | 51.8720873 | 52.0325029 | 51.441222  |
| 32                          | 16.8643676 | 10.0494349 | 8.38957669 | 99.8016635 | 99.9838039 | 99.9559889 | 99.9838039 | 99.9838039 | 66.8765554 | 99.8788262 | 45.6975282 |
| 33                          | 9.02105041 | 15.7645622 | 47.8592234 | 83.6002571 | 99.9898521 | 8.03520382 | 15.0376901 | 53.096511  | 41.5505438 | 31.8118928 | 35.6685819 |
| 34                          | 99.9841201 | 99.9841201 | 1.52268209 | 99.9841201 | 99.9841201 | 99.9841201 | 24.3922416 | 99.9841201 | 78.2274555 | 99.9841201 | 40.7465463 |
