# Supplementary material
Source: Frontiers journal article supplement (https://www.frontiersin.org/articles/318948)
Supplement: Data_Sheet_1.ZIP [file Data_Sheet_1.ZIP]

**EPOC (tasks: 0-back, stop, rest measurements)****parietal alpha**

| Vp | Task      | P7       | O1       | O2       | P8       | mean     | median   | std      |
|----|-----------|----------|----------|----------|----------|----------|----------|----------|
|    | 11 0-back | 0.54799  | 0.600014 | 1.172411 | 1.421836 | 0.935563 | 0.886213 | 0.430257 |
|    | 12 0-back | 11.54377 | 6.976012 | 15.91375 | 7.147813 | 10.39534 | 9.345791 | 4.243031 |
|    | 13 0-back | 6.143188 | 6.096014 | 6.101984 | 6.126778 | 6.116991 | 6.114381 | 0.021964 |
|    | 14 0-back | 7.053414 | 7.250727 | 7.402495 | 7.620887 | 7.331881 | 7.326611 | 0.239889 |
|    | 15 0-back | 7.074202 | 29.96232 | 8.021922 | 3.643929 | 12.17559 | 7.548062 | 12.00603 |
|    | 16 0-back | 0.091033 | 0.237178 | 0.143594 | 0.056134 | 0.131984 | 0.117313 | 0.078805 |
|    | 17 0-back | 12.75585 | 12.75293 | 12.75554 | 12.75594 | 12.75507 | 12.7557  | 0.001435 |
|    | 18 0-back | 7.231271 | 8.52391  | 10.50977 | 8.457833 | 8.680695 | 8.490871 | 1.356537 |
|    | 19 0-back | 0.03813  | 0.046822 | 0.047146 | 0.050199 | 0.045574 | 0.046984 | 0.005191 |
|    | 20 0-back | 6.781847 | 0.014987 | 0.914389 | 13.7915  | 5.37568  | 3.848118 | 6.36248  |
|    | 21 0-back | 10.65053 | 19.38369 | 24.15439 | 12.19035 | 16.59474 | 15.78702 | 6.315556 |
|    | 22 0-back | 6.958584 | 8.797583 | 17.77568 | 5.442814 | 9.743666 | 7.878084 | 5.527579 |
|    | 23 0-back | 7.038682 | 10.8686  | 6.966337 | 6.964099 | 7.95943  | 7.002509 | 1.939759 |
|    | 24 0-back | 4.087273 | 5.98444  | 7.553023 | 8.732232 | 6.589242 | 6.768731 | 2.012206 |
|    | 25 0-back | 0.259053 | 0.024969 | 0.061922 | 0.43131  | 0.194313 | 0.160487 | 0.188471 |
|    | 26 0-back | 14.19309 | 18.43024 | 29.34291 | 29.48096 | 22.8618  | 23.88657 | 7.758936 |
|    | 27 0-back | 6.640902 | 6.545705 | 6.764776 | 6.597881 | 6.637316 | 6.619391 | 0.093464 |
|    | 28 0-back | 29.40685 | 31.6429  | 40.15453 | 4.262645 | 26.36673 | 30.52488 | 15.4464  |
|    | 29 0-back | 42.76994 | 62.95621 | 68.57094 | 63.70244 | 59.49988 | 63.32933 | 11.42779 |
|    | 30 0-back | 14.1694  | 18.74003 | 32.12931 | 29.8372  | 23.71899 | 24.28862 | 8.643895 |
|    | 31 0-back | 9.384393 | 13.38217 | 14.53595 | 13.4238  | 12.68158 | 13.40298 | 2.26214  |
|    | 32 0-back | 7.065883 | 26.35551 | 7.390466 | 7.40787  | 12.05493 | 7.399168 | 9.535015 |
|    | 33 0-back | 2.181981 | 6.984497 | 6.976791 | 6.969126 | 5.778099 | 6.972958 | 2.39742  |
|    | 34 0-back | 6.968613 | 7.015483 | 7.143466 | 6.971636 | 7.0248   | 6.99356  | 0.081959 |
|    | 11 stop   | 0.213242 | 0.115782 | 0.244193 | 0.671375 | 0.311148 | 0.228717 | 0.246306 |
|    | 12 stop   | 7.064067 | 7.046727 | 7.084954 | 7.176647 | 7.093099 | 7.074511 | 0.05785  |
|    | 13 stop   | 6.176761 | 6.239226 | 6.256489 | 6.206616 | 6.219773 | 6.222921 | 0.035354 |
|    | 14 stop   | 7.069293 | 7.231175 | 40.57243 | 7.540583 | 15.60337 | 7.385879 | 16.64719 |
|    | 15 stop   | 7.011797 | 7.028945 | 7.216591 | 7.082599 | 7.084983 | 7.055772 | 0.092777 |

|                |          |          |          |          |          |          |          |
|----------------|----------|----------|----------|----------|----------|----------|----------|
| 16 stop        | 23.27143 | 23.64376 | 23.71876 | 23.51793 | 23.53797 | 23.58084 | 0.196062 |
| 17 stop        | 26.64984 | 26.6579  | 26.64127 | 26.65352 | 26.65063 | 26.65168 | 0.007058 |
| 18 stop        | 7.082796 | 7.898897 | 65.03434 | 39.27547 | 29.82288 | 23.58718 | 27.85062 |
| 19 stop        | 25.56883 | 25.55778 | 25.56008 | 25.55706 | 25.56094 | 25.55893 | 0.005416 |
| 20 stop        | 3.297779 | 18.23123 | 19.87691 | 3.589718 | 11.24891 | 10.91047 | 9.038416 |
| 21 stop        | 9.765755 | 28.49587 | 24.7969  | 10.2716  | 18.33253 | 17.53425 | 9.720251 |
| 22 stop        | 9.97263  | 7.144883 | 7.30193  | 7.220558 | 7.91     | 7.261244 | 1.376581 |
| 23 stop        | 10.13872 | 6.973548 | 6.968576 | 6.974938 | 7.763946 | 6.974243 | 1.583188 |
| 24 stop        | 4.78823  | 5.922961 | 8.026522 | 7.82777  | 6.641371 | 6.875365 | 1.557394 |
| 25 stop        | 7.027458 | 5.692013 | 5.000525 | 7.140804 | 6.2152   | 6.359735 | 1.043339 |
| 26 stop        | 8.506127 | 6.962298 | 22.6401  | 26.30476 | 16.10332 | 15.57311 | 9.799226 |
| 27 stop        | 14.21851 | 14.17116 | 14.11394 | 14.16125 | 14.16621 | 14.1662  | 0.042882 |
| 28 stop        | 23.16759 | 7.210329 | 37.52165 | 7.547063 | 18.86166 | 15.35732 | 14.49724 |
| 29 stop        | 7.305144 | 8.462676 | 10.51788 | 10.48896 | 9.193664 | 9.475818 | 1.584528 |
| 30 stop        | 14.61638 | 10.90204 | 21.36109 | 21.05471 | 16.98355 | 17.83554 | 5.109646 |
| 31 stop        | 6.973009 | 7.009598 | 6.995603 | 7.016804 | 6.998753 | 7.0026   | 0.019289 |
| 32 stop        | 18.73329 | 23.65575 | 28.24474 | 26.99146 | 24.40631 | 25.32361 | 4.249044 |
| 33 stop        | 6.785411 | 10.16698 | 6.976309 | 6.980592 | 7.727324 | 6.978451 | 1.628984 |
| 34 stop        | 9.939048 | 7.009278 | 7.102439 | 8.692579 | 8.185836 | 7.897509 | 1.401021 |
| 11 eyes opened | 7.058138 | 11.37368 | 7.194468 | 6.131629 | 7.939478 | 7.126303 | 2.337652 |
| 12 eyes opened | 7.045125 | 7.006297 | 7.000603 | 7.005445 | 7.014367 | 7.005871 | 0.020658 |
| 13 eyes opened | 0.652076 | 0.664729 | 0.10481  | 0.18246  | 0.401018 | 0.417268 | 0.298932 |
| 14 eyes opened | 6.927528 | 6.955278 | 7.052939 | 7.108845 | 7.011147 | 7.004109 | 0.084469 |
| 15 eyes opened | 7.073837 | 7.117208 | 7.504818 | 7.321838 | 7.254425 | 7.219523 | 0.198898 |
| 16 eyes opened | 3.144828 | 3.141435 | 3.076755 | 3.128851 | 3.122967 | 3.135143 | 0.031566 |
| 17 eyes opened | 12.75752 | 12.75754 | 12.75669 | 12.75747 | 12.75731 | 12.75749 | 0.000409 |
| 18 eyes opened | 7.083046 | 7.40149  | 7.799433 | 7.376796 | 7.415191 | 7.389143 | 0.294179 |
| 19 eyes opened | 6.930062 | 4.152697 | 3.940396 | 4.356625 | 4.844945 | 4.254661 | 1.400427 |
| 20 eyes opened | 6.972361 | 6.981413 | 7.135202 | 7.74919  | 7.209542 | 7.058308 | 0.367443 |
| 21 eyes opened | 6.927523 | 6.968317 | 6.974798 | 6.921706 | 6.948086 | 6.94792  | 0.027335 |
| 22 eyes opened | 6.968359 | 7.02984  | 7.075531 | 7.045793 | 7.029881 | 7.037816 | 0.045174 |
| 23 eyes opened | 6.967689 | 6.973444 | 6.967006 | 6.965018 | 6.968289 | 6.967347 | 0.003619 |
| 24 eyes opened | 6.965312 | 6.970195 | 6.942997 | 6.956482 | 6.958746 | 6.960897 | 0.011935 |

|                 |          |          |          |          |          |          |          |
|-----------------|----------|----------|----------|----------|----------|----------|----------|
| 25 eyes opened  | 6.944394 | 0.481058 | 6.957607 | 6.993464 | 5.344131 | 6.951001 | 3.242115 |
| 26 eyes opened  | 7.023804 | 6.966052 | 7.229422 | 7.269007 | 7.122071 | 7.126613 | 0.149569 |
| 27 eyes opened  | 2.576716 | 3.139247 | 2.955373 | 2.684415 | 2.838938 | 2.819894 | 0.255852 |
| 28 eyes opened  | 6.98971  | 7.004841 | 7.058283 | 7.047912 | 7.025187 | 7.026377 | 0.033087 |
| 29 eyes opened  | 6.998556 | 7.204839 | 7.506453 | 7.536605 | 7.311613 | 7.355646 | 0.256898 |
| 30 eyes opened  | 0.126816 | 0.018226 | 0.033621 | 29.83861 | 7.504319 | 0.080219 | 14.88961 |
| 31 eyes opened  | 0.607443 | 0.315297 | 0.372637 | 0.592836 | 0.472053 | 0.482736 | 0.149861 |
| 32 eyes opened  | 6.998696 | 7.005222 | 7.076849 | 7.11307  | 7.048459 | 7.041035 | 0.055756 |
| 33 eyes opened  | 6.99642  | 6.956211 | 6.968835 | 6.969261 | 6.972682 | 6.969048 | 0.016944 |
| 34 eyes opened  | 6.961178 | 6.950507 | 7.032276 | 6.969354 | 6.978329 | 6.965266 | 0.036783 |
| 11 eyes closeed | 7.147138 | 7.243051 | 7.337162 | 7.328326 | 7.263919 | 7.285688 | 0.088668 |
| 12 eyes closeed | 6.993449 | 6.97219  | 7.015549 | 7.05455  | 7.008935 | 7.004499 | 0.035188 |
| 13 eyes closeed | 0.634592 | 6.932461 | 3.326192 | 2.274024 | 3.291817 | 2.800108 | 2.667847 |
| 14 eyes closeed | 7.009566 | 7.072274 | 7.123683 | 7.17588  | 7.095351 | 7.097979 | 0.071132 |
| 15 eyes closeed | 6.933935 | 7.151073 | 7.269208 | 7.052191 | 7.101602 | 7.101632 | 0.142704 |
| 16 eyes closeed | 3.151488 | 3.173909 | 3.187637 | 3.136923 | 3.162489 | 3.162698 | 0.022638 |
| 17 eyes closeed | 6.838281 | 7.007828 | 6.288957 | 6.908822 | 6.760972 | 6.873552 | 0.322269 |
| 18 eyes closeed | 7.182864 | 7.627881 | 8.222436 | 7.649085 | 7.670567 | 7.638483 | 0.426105 |
| 19 eyes closeed | 15.08701 | 15.00284 | 14.99642 | 15.00977 | 15.02401 | 15.00631 | 0.042354 |
| 20 eyes closeed | 6.978004 | 6.978641 | 7.230408 | 9.97263  | 7.789921 | 7.104525 | 1.459984 |
| 21 eyes closeed | 7.057668 | 7.16584  | 7.200434 | 7.02224  | 7.111545 | 7.111754 | 0.085103 |
| 22 eyes closeed | 6.991342 | 7.059434 | 44.26172 | 40.88138 | 24.79847 | 23.97041 | 20.56895 |
| 23 eyes closeed | 6.959829 | 6.972937 | 6.977579 | 6.977583 | 6.971982 | 6.975258 | 0.008393 |
| 24 eyes closeed | 7.023108 | 7.019302 | 7.062417 | 7.025015 | 7.03246  | 7.024062 | 0.020112 |
| 25 eyes closeed | 6.996095 | 2.461101 | 3.070111 | 7.107948 | 4.908813 | 5.033103 | 2.48764  |
| 26 eyes closeed | 7.011121 | 12.75754 | 7.289838 | 7.405384 | 8.615972 | 7.347611 | 2.766003 |
| 27 eyes closeed | 2.962468 | 3.380028 | 3.338665 | 3.020946 | 3.175527 | 3.179805 | 0.214262 |
| 28 eyes closeed | 7.219506 | 7.144851 | 7.296024 | 7.186028 | 7.211602 | 7.202767 | 0.06403  |
| 29 eyes closeed | 7.252616 | 7.675092 | 8.753274 | 9.292145 | 8.243282 | 8.214183 | 0.94242  |
| 30 eyes closeed | 0.57183  | 12.75754 | 7.348012 | 23.02881 | 10.92655 | 10.05278 | 9.48408  |
| 31 eyes closeed | 0.077917 | 0.108522 | 0.128125 | 0.041376 | 0.088985 | 0.093219 | 0.037872 |
| 32 eyes closeed | 7.071873 | 7.260251 | 7.271775 | 7.307631 | 7.227882 | 7.266013 | 0.105945 |
| 33 eyes closeed | 6.988852 | 6.973841 | 6.969329 | 6.968914 | 6.975234 | 6.971585 | 0.009349 |

34 eyes closed 6.994516 7.161861 7.359484 6.964104 7.119991 7.078188 0.181801
