# Supplementary material
Source: Frontiers journal article supplement (https://www.frontiersin.org/articles/318948)
Supplement: Data_Sheet_1.ZIP [file Data_Sheet_1.ZIP]

| EPOC (all tasks)            |            |            |            |            |            |            |            |            |            |            |            |            |            |            |            |            |            |  |
|-----------------------------|------------|------------|------------|------------|------------|------------|------------|------------|------------|------------|------------|------------|------------|------------|------------|------------|------------|--|
| Proportion of artifacts [%] |            |            |            |            |            |            |            |            |            |            |            |            |            |            |            |            |            |  |
| Vp                          | AF3        | F7         | F3         | FC5        | T7         | P7         | O1         | O2         | P8         | T8         | FC6        | F4         | F8         | AF4        | mean       | median     | std        |  |
| 11                          | 9.87426821 | 10.0196538 | 7.3964334  | 12.5734641 | 8.48137751 | 6.67063009 | 7.20776731 | 6.53364642 | 6.94066395 | 9.91097321 | 7.54467495 | 7.18530888 | 9.88299338 | 10.7556899 | 8.64125322 | 8.01302623 | 1.8538357  |  |
| 12                          | 0.5217834  | 1.16545564 | 0.60438125 | 0.7507853  | 0.5133823  | 0.65136379 | 1.2111952  | 0.74245379 | 0.59059074 | 0.70807374 | 0.58166308 | 0.57442422 | 2.4828974  | 0.59233281 | 0.83505591 | 0.62787252 | 0.52162536 |  |
| 13                          | 88.2993663 | 68.5406525 | 67.6168587 | 69.072999  | 67.9693806 | 65.1546876 | 61.0510692 | 60.2846218 | 59.9743148 | 67.9238762 | 62.3997534 | 65.4682841 | 68.0949288 | 67.7747534 | 67.1161105 | 67.695806  | 6.91084992 |  |
| 14                          | 0          | 2.42320102 | 99.9953026 | 0.23204985 | 0.2218192  | 0          | 0          | 0.28723404 | 0          | 0.70107937 | 0.1048951  | 0.96693318 | 0.84545988 | 7.55556959 | 0.22693452 | 26.6141337 |            |  |
| 15                          | 0.4719407  | 2.8672494  | 0.94749101 | 6.72082368 | 1.16853943 | 0.18270767 | 0.2959897  | 0          | 3.86759856 | 3.91736508 | 0.24261182 | 0.17122604 | 0.33329822 | 0.22713658 | 1.52956985 | 0.40261946 | 2.03428846 |  |
| 16                          | 80.0814588 | 80.2856182 | 80.0988804 | 80.1555006 | 80.1097689 | 80.145701  | 80.2496861 | 80.1212018 | 80.10868   | 80.1565895 | 80.2654745 | 80.0988804 | 80.2926957 | 80.2627523 | 80.1737777 | 80.1506008 | 0.07893303 |  |
| 17                          | 99.9710928 | 99.9710928 | 99.9710928 | 99.9710928 | 99.9710928 | 99.9710928 | 99.9710928 | 99.9710928 | 99.9710928 | 99.9710928 | 99.9710928 | 99.9710928 | 99.9710928 | 99.9710928 | 99.9710928 | 99.9710928 | 2.9495E-14 |  |
| 18                          | 3.69534355 | 1.95695509 | 1.07731328 | 1.3578657  | 0.933608   | 0.13354239 | 0.6704444  | 0.92540472 | 0.9208301  | 1.00597371 | 1.04802141 | 0.97726591 | 1.34687919 | 0.90822726 | 1.21126248 | 0.99161981 | 0.81792614 |  |
| 19                          | 99.9230485 | 99.9230485 | 99.9230485 | 99.9230485 | 99.9230485 | 99.9230485 | 99.9230485 | 99.9230485 | 99.9230485 | 99.9230485 | 99.9230485 | 99.9230485 | 99.9230485 | 99.9230485 | 99.9230485 | 99.9230485 | 1.4747E-14 |  |
| 20                          | 35.2137769 | 34.9991124 | 53.7367678 | 29.5802377 | 28.2396366 | 41.3456257 | 34.7052669 | 33.7098175 | 99.9058052 | 99.9317244 | 41.3789825 | 29.4614297 | 34.0486026 | 33.979011  | 45.0168426 | 34.8521897 | 24.1241885 |  |
| 21                          | 0.97020629 | 5.80082601 | 0.51423343 | 1.84964579 | 0.5094697  | 0.62259606 | 0.77731353 | 0.81464768 | 2.04597455 | 1.49104215 | 2.00980272 | 1.27722429 | 4.3552647  | 1.03698454 | 1.71965939 | 1.15710442 | 1.54207298 |  |
| 22                          | 22.8975152 | 23.6586476 | 10.7844293 | 24.4272619 | 9.82107185 | 46.024106  | 14.3573627 | 13.1882007 | 25.2211744 | 23.7689218 | 21.8776968 | 23.5907513 | 30.6774265 | 23.9123043 | 22.4433479 | 23.6246994 | 9.15268887 |  |
| 23                          | 3.49674328 | 48.5445832 | 7.9108192  | 0.24934669 | 2.96338318 | 9.52963778 | 0.12957317 | 0          | 0          | 0.47103054 | 0          | 0          | 3.67099318 | 1.11400413 | 5.57715102 | 0.79251733 | 12.7416154 |  |
| 24                          | 7.13691336 | 7.18961094 | 6.91919667 | 7.26341236 | 7.44582354 | 7.30569576 | 8.87402734 | 7.4541894  | 6.4689994  | 7.41754594 | 14.0476707 | 7.86904495 | 8.66859757 | 7.69170545 | 7.98231667 | 7.43168474 | 1.85587892 |  |
| 25                          | 15.0177537 | 18.9976642 | 17.4851827 | 16.5286232 | 15.7518639 | 15.6697597 | 15.6392394 | 14.8827837 | 15.0114316 | 15.2266977 | 22.4269053 | 16.3957059 | 17.9665846 | 15.2507754 | 16.5893551 | 15.7108118 | 2.08636524 |  |
| 26                          | 0.48248635 | 1.34076265 | 0.4740913  | 1.73096455 | 0.90542107 | 0.62162728 | 0.36980969 | 0.59755897 | 0.58802233 | 1.32324215 | 0.29778288 | 0.84496881 | 2.25580975 | 0.32597356 | 0.86846581 | 0.60959313 | 0.58746819 |  |
| 27                          | 99.9287895 | 99.9287895 | 99.9287895 | 99.9287895 | 99.9287895 | 99.9287895 | 99.9287895 | 99.9287895 | 99.9287895 | 99.9287895 | 99.9287895 | 99.9287895 | 99.9287895 | 99.9287895 | 99.9287895 | 99.9287895 | 1.4747E-14 |  |
| 28                          | 6.14077904 | 6.17844066 | 3.58763936 | 3.44722518 | 12.9494079 | 2.57073163 | 1.83979348 | 1.52791461 | 5.51772875 | 5.36606868 | 6.24003493 | 77.9737832 | 10.8325953 | 8.31138122 | 10.8916803 | 5.82925389 | 19.5809234 |  |
| 29                          | 4.25639991 | 37.642444  | 0.26426698 | 9.4245092  | 0.64842102 | 0.73737734 | 0.68066656 | 0.53617043 | 0.62361076 | 0.59069923 | 7.55235301 | 0.42787074 | 7.8504379  | 5.79886638 | 5.50243525 | 0.70902195 | 9.82546435 |  |
| 30                          | 27.7378144 | 12.6613922 | 8.5002895  | 9.255742   | 12.1201227 | 4.05950609 | 7.82723767 | 7.08953523 | 4.97559288 | 12.6571104 | 8.81841889 | 11.7304286 | 11.5450714 | 10.384829  | 10.6687922 | 9.82028549 | 5.61906784 |  |
| 31                          | 4.67776215 | 5.52445113 | 1.1795829  | 4.24584357 | 1.75999954 | 1.04328688 | 0.71400631 | 0.41523667 | 0.48613699 | 1.98856932 | 2.81440172 | 1.39069209 | 2.75024399 | 3.46514153 | 2.31823963 | 1.87428443 | 1.64235459 |  |
| 32                          | 1.09433943 | 1.86389444 | 0.22894022 | 3.91638062 | 1.04415625 | 0.24817264 | 0.91513171 | 0.303432   | 0.15557065 | 0.37625019 | 0.62960752 | 0.19299139 | 2.74682601 | 1.09704772 | 1.05805291 | 0.77236962 | 1.10310199 |  |
| 33                          | 8.77446388 | 11.2757143 | 5.01341187 | 5.18877295 | 6.17647789 | 4.37101012 | 0.48006225 | 0.18229167 | 0.16601563 | 4.49843561 | 3.61975139 | 0.19314236 | 7.28485063 | 7.6630065  | 4.63481479 | 4.75592374 | 3.48802239 |  |
| 34                          | 0.43818707 | 0.46419696 | 0          | 0.03135813 | 1.65912881 | 0.54262495 | 0          | 0.60340471 | 2.14847314 | 0.16258446 | 0          | 0.18581081 | 1.07530483 | 0.75740719 | 0.57632008 | 0.45119201 | 0.65495345 |  |
