# Supplementary material
Source: Frontiers journal article supplement (https://www.frontiersin.org/articles/318948)
Supplement: Data_Sheet_1.ZIP [file Data_Sheet_1.ZIP]

| g.LADYbird (all tasks) |             |             |             |             |             |             |             |             |             |             |             |             |             |            |             |             |             |             |             |
|------------------------|-------------|-------------|-------------|-------------|-------------|-------------|-------------|-------------|-------------|-------------|-------------|-------------|-------------|------------|-------------|-------------|-------------|-------------|-------------|
| SNR [dB]               |             |             |             |             |             |             |             |             |             |             |             |             |             |            |             |             |             |             |             |
| Vp                     | Fp1         | Fp2         | F3          | Fz          | F4          | T7          | C3          | Cz          | C4          | T8          | P3          | Pz          | P4          | PO7        | PO8         | Oz          | mean        | median      | std         |
| 11                     | -6.98058367 | -2.66200352 | 5.94594383  | 5.54431486  | 5.71597672  | 10.1090727  | 7.4326725   | 10.7486582  | 8.72081947  | 3.37599087  | 9.49768925  | 10.8049116  | 10.3127584  | 10.5125914 | 9.84177494  | 9.04825306  | 6.74805254  | 8.88453627  | 5.09230986  |
| 12                     | -11.0448828 | -8.19163322 | -1.69857669 | 0.3355352   | -1.24662471 | 3.71208334  | 4.78342628  | 5.35373211  | 4.95845318  | 4.58612728  | 7.76459694  | 7.21162701  | 6.14263964  | 9.22157001 | 4.96081972  | 8.20072365  | 2.81560106  | 4.87093973  | 5.800413    |
| 13                     | -8.48187637 | -9.2681818  | -3.82035327 | -3.58999634 | -4.21338606 | 0.55353737  | -2.47018743 | -1.40598774 | -2.27846456 | 1.71236563  | -1.088588   | -0.05099433 | -0.04543006 | 0.26680359 | -3.11605263 | -6.70780516 | -2.75028732 | -2.37432599 | 3.20962993  |
| 14                     | 1.22807097  | 2.9285326   | 4.46490908  | 6.82497835  | 6.88991833  | 5.97882128  | 7.57396936  | 7.18512344  | 7.78300142  | 10.2160234  | 6.79062462  | 7.09019518  | 7.29674053  | 8.44668102 | 8.05E+00    | 8.28E+00    | 6.689476    | 7.13765931  | 2.19338775  |
| 15                     | -17.5231457 | -17.3087521 | -6.30983496 | -4.10408306 | -5.31184053 | 2.84023404  | 2.11143637  | 5.08306456  | 2.49396992  | 7.47368622  | 8.4016161   | 10.5604744  | 9.53556061  | 12.4250698 | 12.9006634  | 11.6148109  | 2.18018313  | 3.9616493   | 9.81381689  |
| 16                     | -6.96858931 | -7.8756156  | 2.7868793   | 3.80083799  | 1.59336925  | -19.5673447 | 6.80799437  | 7.65399981  | 6.6238308   | 6.52769327  | 9.43646336  | 9.93862438  | 9.64909744  | 13.2265472 | 12.3690691  | 12.0704594  | 4.25458226  | 6.71591258  | 8.84900712  |
| 17                     | 2.28975654  | 2.16333246  | 8.06205559  | 8.29166031  | 7.86682415  | 8.37170696  | 11.0132532  | 11.2937984  | 11.5734043  | 8.29794312  | 11.9940176  | 11.5136375  | 12.1428165  | 12.8526115 | 12.6978168  | 12.3495178  | 9.54838456  | 11.1535258  | 3.37975979  |
| 18                     | -7.90184402 | -9.29549408 | 2.61906695  | 3.61953902  | 1.29223561  | 7.22854948  | 9.01501846  | 11.2925329  | 9.384758    | 7.02828693  | 13.1322241  | 13.678854   | 13.4663954  | 13.651022  | 14.8494883  | 13.8678789  | 7.30803199  | 9.19988823  | 7.54788582  |
| 19                     | 1.76314545  | 0.19079609  | 8.78556728  | 10.629981   | 9.41637707  | 8.61166954  | 11.9384241  | 13.0512619  | 12.7011271  | 7.63183165  | 12.8497477  | 12.9951973  | 12.7700558  | 8.73272991 | 9.32703495  | 8.94667721  | 9.3963515   | 9.37170601  | 3.79720606  |
| 20                     | -0.70552647 | -1.13491035 | 0.24727173  | 0.29235134  | 0.3446348   | 0.58594316  | 0.25472212  | 0.31995398  | 0.48033699  | 1.3766278   | 1.81033862  | 1.7157886   | 0.24196605  | 2.32042408 | -24.1808739 | -14.4591522 | -1.90563148 | 0.30615266  | 7.08063368  |
| 21                     | -2.33794999 | -3.64371943 | 4.69648647  | 6.39752579  | 5.67954254  | 7.44153929  | 7.85955     | 9.06482506  | 8.6321888   | -34.3720856 | 11.9177408  | 12.3057442  | 11.3867111  | 7.22193289 | 10.8561945  | 10.7854404  | 4.61822918  | 7.65054464  | 11.3650684  |
| 22                     | -2.4467864  | -6.5294652  | 1.68114889  | 1.99861717  | 0.82244438  | 5.19766235  | 5.80284786  | 6.0782814   | 6.37525177  | 5.70775366  | 1.48969829  | 9.0203495   | 8.33975506  | 8.67072964 | 8.84894371  | 9.05712509  | 4.38214732  | 5.75530076  | 4.53414605  |
| 23                     | -1.03281951 | 2.09055853  | 4.99268579  | 7.236413    | 7.32090044  | 8.17522907  | 8.10282135  | 9.41739273  | 9.33873177  | 9.9381628   | 10.1396885  | -34.4765739 | 10.381175   | 12.5009327 | 12.8079166  | 11.8692245  | 5.55015247  | 8.75698042  | 11.2872358  |
| 24                     | -10.8745642 | -4.92642212 | -33.0458069 | -2.78086281 | -2.62072539 | 1.59262156  | 0.26950586  | 1.47662389  | 0.82191652  | 1.75282168  | 2.87677836  | 4.19835949  | 4.01461983  | 5.48974609 | 6.28411293  | 0.88971591  | -1.53634745 | 1.1831699   | 9.42465693  |
| 25                     | -8.1434164  | -19.0746078 | 0.12318279  | 0.71863383  | -0.83751941 | 0.0683522   | 0.95665663  | 1.58837938  | 0.73006529  | 0.61819875  | 1.57497776  | 1.90211022  | 2.92383051  | 3.8268044  | 3.96292949  | 2.45148706  | -0.41312096 | 0.84336096  | 5.68050826  |
| 26                     | -7.54268122 | -7.86850214 | -0.2810469  | 1.07976115  | 0.52106518  | 5.03635883  | 5.10451889  | 6.09039927  | 5.0513382   | 3.35335684  | 7.85144615  | 7.97498941  | 7.72382116  | 9.38600159 | 9.24674797  | 10.0810814  | 3.92554099  | 5.07792854  | 5.53274767  |
| 27                     | -7.22660208 | -6.80271769 | -0.73326659 | 0.74187303  | -1.80104959 | 4.96708536  | 3.03580809  | 4.16166973  | -6.38E-01   | 3.92111897  | 5.68777704  | 5.72241116  | -0.68817186 | 8.28906822 | 7.0724411   | 8.45603848  | 2.13535351  | 3.47846353  | 4.84884472  |
| 28                     | -5.94501925 | -3.31914997 | -0.46831977 | 2.65561938  | 1.1353761   | 2.42563176  | 2.39800143  | 3.82356548  | 3.62546706  | 2.07799649  | 5.44870901  | 5.85338783  | 7.12855005  | 7.54684353 | 9.23519611  | 8.05148506  | 3.22958377  | 3.14054322  | 4.11169139  |
| 29                     | -11.6391735 | -11.467845  | -2.47049546 | -0.633663   | -1.94671953 | 2.3184948   | 2.673244    | 3.4512496   | 3.04763579  | 1.74370337  | 6.32655048  | 6.2492013   | 6.74015141  | 8.85976315 | 10.0102987  | 8.1084156   | 1.96067574  | 2.8604399   | 6.43679568  |
| 30                     | 5.33015442  | 4.97068405  | 5.98477268  | 6.64483547  | 6.06561279  | 6.63350677  | 6.86791277  | 7.90421343  | 7.03346491  | 9.62469101  | 7.9050293   | 7.98662281  | 8.29415703  | 7.13281059 | 8.11514187  | 7.84281778  | 7.14602673  | 7.08313775  | 1.20812776  |
| 31                     | -6.16440916 | -3.39267135 | 0.61603659  | 2.29306507  | 2.31315398  | 7.66912413  | 6.20290279  | 7.27732849  | 7.95721722  | 14.1376429  | 9.15008926  | 9.42934799  | 9.53495407  | 11.9139986 | 12.5226059  | 12.7035828  | 6.51024808  | 7.81317067  | 5.88500105  |
| 32                     | -4.10901546 | -3.43999314 | -1.64037383 | 4.26431942  | 3.92690802  | 7.21110249  | 5.81016731  | 5.93044138  | 6.01291037  | 5.98778725  | 7.37739658  | 7.42626667  | 7.47156572  | 9.71772194 | 9.36962032  | 9.78699398  | 5.06898869  | 6.00034881  | 4.39882413  |
| 33                     | -8.36482048 | -8.05250835 | -1.13635778 | -0.46863809 | -1.56306887 | -0.57511592 | 1.17860603  | 2.03669047  | -51.3708458 | -2.0852406  | -0.04228516 | 1.1934644   | 2.70643282  | 2.9326396  | 2.12263513  | -7.4145689  | -4.30643634 | -0.52187701 | 13.08444784 |
| 34                     | -11.9159002 | -11.5606031 | -1.32929206 | 0.11048307  | -1.69053829 | 5.12126827  | 3.51508212  | 4.12016296  | 2.84803391  | 1.3659898   | 5.93353224  | 5.74550152  | 5.79058552  | 6.23398066 | 5.07672691  | 5.05052233  | 1.52597097  | 3.81762254  | 5.77606583  |
