# Supplementary material
Source: Frontiers journal article supplement (https://www.frontiersin.org/articles/318948)
Supplement: Data_Sheet_1.ZIP [file Data_Sheet_1.ZIP]

| Trilobite (tasks: 0-back, stop) |           |          |          |          |          |          |          |          |          |          |          |          |          |
|---------------------------------|-----------|----------|----------|----------|----------|----------|----------|----------|----------|----------|----------|----------|----------|
| frontal theta                   |           |          |          |          |          |          |          |          |          |          |          |          |          |
| Vp                              | Task      | Fp2      | Fp1      | AF4      | AF3      | F8       | F4       | Fz       | F3       | F7       | mean     | median   | std      |
|                                 | 11 0-back | 30.06671 | 28.80175 | 28.1911  | 27.05284 | 33.67483 | 18.97526 | 38.34513 | 23.84386 | 23.2887  | 28.02669 | 28.1911  | 5.766091 |
|                                 | 12 0-back | 34.25471 | 31.20435 | 15.03628 | 15.60454 | 19.46766 | 18.49962 | 32.9414  | 18.93496 | 28.59975 | 23.83814 | 19.46766 | 7.787933 |
|                                 | 13 0-back | 43.84667 | 41.68112 | 49.58921 | 54.82889 | 20.99291 | 21.88186 | 32.92449 | 28.17167 | 26.70441 | 35.62458 | 32.92449 | 12.31592 |
|                                 | 14 0-back | 34.0652  | 32.30952 | 17.22255 | 26.82628 | 17.79768 | 18.70442 | 17.49612 | 17.32184 | 28.01248 | 23.30623 | 18.70442 | 6.977255 |
|                                 | 15 0-back | 39.17156 | 39.74564 | 16.78979 | 38.54069 | 39.09176 | 19.23626 | 17.57338 | 17.56887 | 39.45235 | 29.68559 | 38.54069 | 11.30529 |
|                                 | 16 0-back | 36.64346 | 35.81145 | 32.8048  | 26.54977 | 15.60142 | 36.55752 | 35.02839 | 32.61916 | 20.39454 | 30.22339 | 32.8048  | 7.680823 |
|                                 | 17 0-back | 33.83715 | 28.95089 | 18.25011 | 18.20912 | 32.2527  | 19.31801 | 20.13709 | 19.82206 | 29.58142 | 24.48428 | 20.13709 | 6.512711 |
|                                 | 18 0-back | 36.57644 | 35.88198 | 37.67709 | 37.0638  | 34.05677 | 11.35075 | 11.09148 | 11.26841 | 33.64829 | 27.62389 | 34.05677 | 12.35838 |
|                                 | 19 0-back | 45.86747 | 41.38099 | 34.14258 | 9.24748  | 14.69174 | 19.63819 | 38.9412  | 19.18254 | 19.0021  | 26.89937 | 19.63819 | 13.2393  |
|                                 | 20 0-back | 41.3182  | 40.83378 | 17.44063 | 17.48874 | 20.3738  | 21.37363 | 43.19302 | 24.28148 | 29.84747 | 28.46119 | 24.28148 | 10.67877 |
|                                 | 21 0-back | 31.76632 | 37.22465 | 19.30104 | 36.9971  | 19.84423 | 19.90808 | 35.32486 | 23.84859 | 28.18934 | 28.04491 | 28.18934 | 7.572981 |
|                                 | 22 0-back | 34.48775 | 32.0826  | 19.69768 | 20.03624 | 21.41141 | 22.00039 | 20.47021 | 20.39114 | 21.34097 | 23.54649 | 21.34097 | 5.600723 |
|                                 | 23 0-back | 30.38491 | 32.77734 | 24.45903 | 34.61244 | 17.93551 | 18.04583 | 27.96021 | 14.15896 | 31.86941 | 25.80041 | 27.96021 | 7.484627 |
|                                 | 24 0-back | 35.70723 | 37.22545 | 19.586   | 19.40213 | 19.89752 | 20.28407 | 20.90812 | 20.48947 | 20.07796 | 23.73088 | 20.28407 | 7.244379 |
|                                 | 25 0-back | 25.72388 | 52.1759  | 26.09157 | 38.52245 | 25.86869 | 27.30427 | 39.90759 | 34.14716 | 28.97474 | 33.19069 | 28.97474 | 8.993636 |
|                                 | 26 0-back | 35.25804 | 35.83983 | 39.14667 | 26.09089 | 32.80734 | 18.93955 | 17.96166 | 18.32726 | 4.22011  | 25.39904 | 26.09089 | 11.4355  |
|                                 | 27 0-back | 47.03201 | 46.71915 | 44.11129 | 42.40022 | 15.60126 | 47.03201 | 46.77736 | 44.21326 | 24.8583  | 39.86054 | 44.21326 | 11.48253 |
|                                 | 28 0-back | 35.06581 | 33.4628  | 18.60364 | 18.44099 | 36.34687 | 19.46249 | 17.31329 | 18.21898 | 19.95619 | 24.09678 | 19.46249 | 8.211687 |
|                                 | 29 0-back | 44.59429 | 44.12559 | 36.13453 | 36.40637 | 11.76413 | 44.45678 | 43.20617 | 36.37921 | 20.121   | 35.24312 | 36.40637 | 11.7155  |
|                                 | 30 0-back | 33.84306 | 32.60276 | 34.60776 | 28.45284 | 41.58513 | 17.45716 | 32.40021 | 25.37142 | 24.89729 | 30.13529 | 32.40021 | 6.98001  |
|                                 | 31 0-back | 37.90017 | 35.98498 | 18.46442 | 18.65114 | 18.1373  | 37.56678 | 35.86564 | 18.48583 | 20.76764 | 26.86932 | 20.76764 | 9.50057  |
|                                 | 32 0-back | 46.89959 | 49.12013 | 27.24091 | 36.86375 | 12.18674 | 46.85745 | 49.11686 | 27.25003 | 19.61783 | 35.01703 | 36.86375 | 13.97165 |
|                                 | 33 0-back | 31.54547 | 38.61099 | 19.98472 | 38.03894 | 11.30375 | 31.59514 | 37.12119 | 20.02191 | 21.32416 | 27.72736 | 31.54547 | 9.8274   |
|                                 | 34 0-back | 22.99404 | 34.73536 | 19.77064 | 19.53255 | 19.69046 | 19.16836 | 23.31599 | 23.62254 | 19.96914 | 22.53323 | 19.96914 | 4.918305 |
|                                 | 11 stop   | 32.89235 | 32.35249 | 22.49334 | 24.44005 | 8.622168 | 16.96364 | 39.10201 | 26.23582 | 23.16398 | 25.14065 | 24.44005 | 9.078467 |
|                                 | 12 stop   | 30.39954 | 33.88017 | 19.65075 | 20.25016 | 21.13131 | 20.39262 | 36.36128 | 16.60721 | 30.28803 | 25.44012 | 21.13131 | 7.255345 |
|                                 | 13 stop   | 25.27295 | 24.72851 | 13.7764  | 12.31289 | 22.71253 | 24.89628 | 25.91607 | 36.75435 | 20.04834 | 22.93537 | 24.72851 | 7.223935 |
|                                 | 14 stop   | 13.7764  | 14.69359 | 23.58387 | 33.11901 | 20.24658 | 19.95466 | 20.25825 | 19.8183  | 31.08191 | 21.83695 | 20.24658 | 6.561682 |
|                                 | 15 stop   | 52.46385 | 49.46395 | 16.86187 | 47.59568 | 42.99889 | 19.54651 | 13.73482 | 16.43459 | 44.51666 | 33.7352  | 42.99889 | 16.49878 |

|         |          |          |          |          |          |          |          |          |          |          |          |          |
|---------|----------|----------|----------|----------|----------|----------|----------|----------|----------|----------|----------|----------|
| 16 stop | 10.84814 | 25.63252 | 32.33055 | 30.68225 | 26.07823 | 26.17724 | 25.63252 | 32.33057 | 18.16689 | 25.31988 | 26.07823 | 6.974564 |
| 17 stop | 33.30764 | 30.67827 | 16.32043 | 16.14778 | 29.93343 | 18.11978 | 31.34284 | 18.97634 | 24.35486 | 24.35349 | 24.35486 | 7.069325 |
| 18 stop | 33.09801 | 37.36255 | 36.22564 | 32.55048 | 41.0123  | 0.169405 | 42.46762 | 13.98844 | 19.42954 | 28.47822 | 33.09801 | 14.24301 |
| 19 stop | 46.00001 | 43.53079 | 33.9191  | 32.52957 | 34.3111  | 20.84853 | 37.25703 | 19.1597  | 20.11425 | 31.96334 | 33.9191  | 9.977398 |
| 20 stop | 37.49906 | 38.91243 | 20.20738 | 20.56658 | 23.4915  | 24.5885  | 41.08417 | 22.34883 | 21.14383 | 27.76025 | 23.4915  | 8.709762 |
| 21 stop | 30.67149 | 33.81387 | 14.18052 | 36.50956 | 19.50336 | 19.68688 | 39.69031 | 23.02505 | 26.3767  | 27.05086 | 26.3767  | 8.671579 |
| 22 stop | 33.56547 | 30.78504 | 18.87246 | 19.45313 | 3.831578 | 19.60646 | 20.19743 | 19.81647 | 3.566104 | 18.85491 | 19.60646 | 10.1355  |
| 23 stop | 29.07799 | 29.91108 | 25.59696 | 28.64446 | 23.72567 | 19.03315 | 28.03634 | 24.69013 | 34.24268 | 26.99538 | 28.03634 | 4.337669 |
| 24 stop | 15.607   | 15.57635 | 17.30674 | 16.91363 | 17.377   | 18.38391 | 29.1617  | 21.195   | 14.51459 | 18.44844 | 17.30674 | 4.457112 |
| 25 stop | 33.80023 | 39.77747 | 31.76724 | 30.26156 | 22.69848 | 27.29616 | 47.11124 | 24.04751 | 30.1426  | 31.87806 | 30.26156 | 7.667776 |
| 26 stop | 11.4076  | 28.81911 | 39.80497 | 29.29168 | 44.84436 | 19.81591 | 18.57917 | 18.41775 | 17.67536 | 25.40621 | 19.81591 | 11.14864 |
| 27 stop | 35.41882 | 32.88619 | 36.43801 | 36.99882 | 31.63053 | 35.41882 | 32.88619 | 33.12239 | 14.45752 | 32.1397  | 33.12239 | 6.879232 |
| 28 stop | 30.75531 | 27.68713 | 20.07554 | 20.05442 | 32.80752 | 21.88676 | 19.19932 | 21.14875 | 20.36013 | 23.77499 | 21.14875 | 5.198622 |
| 29 stop | 44.14941 | 44.44755 | 38.80854 | 35.29971 | 10.49175 | 44.11166 | 44.66975 | 38.82446 | 17.9694  | 35.41914 | 38.82446 | 12.58883 |
| 30 stop | 32.13129 | 28.87423 | 33.69559 | 33.65915 | 34.88391 | 19.00127 | 41.74629 | 25.65491 | 24.75893 | 30.48951 | 32.13129 | 6.706793 |
| 31 stop | 43.16488 | 41.92743 | 18.18686 | 18.56443 | 7.762866 | 43.05534 | 38.76377 | 18.19349 | 22.46635 | 28.00949 | 22.46635 | 13.63876 |
| 32 stop | 37.65571 | 40.18914 | 31.17894 | 32.35716 | 14.69378 | 37.74122 | 40.5943  | 31.14561 | 18.29909 | 31.53944 | 32.35716 | 9.305345 |
| 33 stop | 34.49392 | 41.09179 | 21.71702 | 38.45776 | 17.48132 | 34.5285  | 44.50377 | 21.71853 | 20.52895 | 30.5024  | 34.49392 | 10.16711 |
| 34 stop | 39.81395 | 40.49823 | 18.24345 | 18.2538  | 19.90227 | 20.17372 | 41.97019 | 23.89106 | 18.68228 | 26.82544 | 20.17372 | 10.60207 |
