# Supplementary material
Source: Frontiers journal article supplement (https://www.frontiersin.org/articles/318948)
Supplement: Data_Sheet_1.ZIP [file Data_Sheet_1.ZIP]

**g.LADYbird (tasks: 0-back, stop, rest measurements)**

**parietal alpha**

| Vp | Task      | P3       | Pz       | P4       | PO7      | PO8      | Oz       | mean     | median   | std      |
|----|-----------|----------|----------|----------|----------|----------|----------|----------|----------|----------|
|    | 11 0-back | 26.9451  | 26.68218 | 23.28173 | 27.29979 | 17.7986  | 18.23402 | 23.37357 | 24.98195 | 4.395943 |
|    | 12 0-back | 24.03861 | 24.12477 | 20.61838 | 24.23205 | 13.8141  | 23.79228 | 21.77003 | 23.91544 | 4.134376 |
|    | 13 0-back | 12.81757 | 13.22736 | 14.64368 | 11.92051 | 1.834783 | 0.009576 | 9.075578 | 12.36904 | 6.402478 |
|    | 14 0-back | 47.55994 | 48.05445 | 44.52651 | 42.36274 | 42.91661 | 39.16667 | 44.09782 | 43.72156 | 3.362946 |
|    | 15 0-back | 40.65202 | 45.78243 | 36.31546 | 31.26523 | 20.82559 | 25.94579 | 33.46442 | 33.79034 | 9.301933 |
|    | 16 0-back | 16.80407 | 16.4147  | 17.09786 | 16.43812 | 13.4151  | 15.90149 | 16.01189 | 16.42641 | 1.33464  |
|    | 17 0-back | 23.01851 | 23.90916 | 28.59531 | 18.94296 | 18.94629 | 16.05725 | 21.57825 | 20.9824  | 4.496665 |
|    | 18 0-back | 63.33964 | 70.53973 | 71.0022  | 46.24441 | 61.06928 | 46.09767 | 59.71549 | 62.20446 | 11.19318 |
|    | 19 0-back | 24.67012 | 24.1028  | 20.67981 | 17.44252 | 16.26941 | 16.2331  | 19.89963 | 19.06116 | 3.839068 |
|    | 20 0-back | 39.75246 | 41.59019 | 16.69876 | 36.21728 | 28.2401  | 28.23981 | 31.78977 | 32.22869 | 9.295123 |
|    | 21 0-back | 62.14893 | 65.63774 | 66.96304 | 29.48439 | 30.24736 | 21.6179  | 46.01656 | 46.19814 | 20.98225 |
|    | 22 0-back | 17.24774 | 38.68013 | 32.6966  | 22.59499 | 17.08855 | 17.73541 | 24.34057 | 20.1652  | 9.219777 |
|    | 23 0-back | 13.87047 | 29.68925 | 13.72621 | 15.1754  | 14.3171  | 13.38756 | 16.69433 | 14.09379 | 6.396015 |
|    | 24 0-back | 16.80539 | 18.17584 | 16.43871 | 17.8633  | 15.58956 | 12.97834 | 16.30852 | 16.62205 | 1.885474 |
|    | 25 0-back | 38.73099 | 38.20251 | 41.55489 | 43.01389 | 34.43394 | 29.9258  | 37.64367 | 38.46675 | 4.806233 |
|    | 26 0-back | 29.98773 | 28.81418 | 29.23191 | 28.52316 | 27.19258 | 25.28128 | 28.17181 | 28.66867 | 1.689466 |
|    | 27 0-back | 22.07622 | 22.57826 | 20.93913 | 18.60322 | 17.3011  | 15.71867 | 19.5361  | 19.77117 | 2.76093  |
|    | 28 0-back | 39.84353 | 33.61769 | 34.19138 | 37.81529 | 37.75867 | 29.37731 | 35.43398 | 35.97502 | 3.795923 |
|    | 29 0-back | 55.23442 | 58.08878 | 58.58144 | 67.00434 | 74.81422 | 64.62456 | 63.05796 | 61.603   | 7.241234 |
|    | 30 0-back | 42.51489 | 44.31109 | 44.65575 | 28.52642 | 22.25041 | 22.59226 | 34.1418  | 35.52066 | 10.86642 |
|    | 31 0-back | 24.69527 | 25.1509  | 23.72193 | 14.86685 | 16.08154 | 15.09664 | 19.93552 | 19.90174 | 5.06264  |
|    | 32 0-back | 30.95086 | 30.78145 | 31.97306 | 29.46542 | 29.13565 | 25.97277 | 29.7132  | 30.12343 | 2.105505 |
|    | 33 0-back | 13.45199 | 13.85396 | 19.56263 | 20.03113 | 15.36751 | 14.39777 | 16.11083 | 14.88264 | 2.930315 |
|    | 34 0-back | 21.74586 | 21.47882 | 20.74065 | 11.89564 | 11.39347 | 11.93998 | 16.5324  | 16.34032 | 5.260325 |
|    | 11 stop   | 36.24186 | 33.86555 | 32.47311 | 29.19552 | 23.45673 | 18.36755 | 28.93339 | 30.83431 | 6.8113   |
|    | 12 stop   | 11.9606  | 12.00211 | 10.26473 | 10.72663 | 6.848763 | 9.541574 | 10.22407 | 10.49568 | 1.912574 |
|    | 13 stop   | 17.68767 | 17.91304 | 16.82865 | 12.84103 | 13.09859 | 13.08907 | 15.24301 | 14.96362 | 2.474964 |
|    | 14 stop   | 31.66587 | 33.00367 | 30.585   | 28.16226 | 28.39593 | 25.90058 | 29.61889 | 29.49047 | 2.60858  |
|    | 15 stop   | 32.06403 | 40.15038 | 31.03143 | 20.14767 | 15.75523 | 20.52938 | 26.61302 | 25.7804  | 9.264978 |

|                |          |          |          |          |          |          |          |          |          |
|----------------|----------|----------|----------|----------|----------|----------|----------|----------|----------|
| 16 stop        | 15.57117 | 16.13431 | 16.95472 | 15.4913  | 13.65297 | 13.20699 | 15.16858 | 15.53124 | 1.451484 |
| 17 stop        | 16.63978 | 16.91297 | 19.01419 | 16.34065 | 15.56357 | 14.67306 | 16.52404 | 16.49022 | 1.466135 |
| 18 stop        | 56.63885 | 62.86874 | 63.05192 | 43.93748 | 44.23864 | 39.64904 | 51.73078 | 50.43875 | 10.3841  |
| 19 stop        | 21.94072 | 21.88765 | 20.85595 | 14.03464 | 14.56069 | 15.33045 | 18.10168 | 18.0932  | 3.83189  |
| 20 stop        | 50.34292 | 51.22493 | 15.5776  | 44.42322 | 0.007099 | 11.61754 | 28.86555 | 30.00041 | 22.40595 |
| 21 stop        | 47.39821 | 47.33836 | 45.27607 | 15.75628 | 17.3203  | 13.03088 | 31.02002 | 31.29818 | 17.21651 |
| 22 stop        | 16.60028 | 36.85123 | 35.68198 | 26.52416 | 24.08863 | 22.56778 | 27.05234 | 25.3064  | 7.860134 |
| 23 stop        | 14.96758 | 16.19662 | 16.09665 | 16.74224 | 17.9383  | 15.15919 | 16.18343 | 16.14664 | 1.088751 |
| 24 stop        | 12.28873 | 14.35294 | 12.691   | 13.68885 | 12.29009 | 11.85395 | 12.86093 | 12.49054 | 0.959971 |
| 25 stop        | 30.80723 | 31.03392 | 39.40031 | 40.25382 | 34.5299  | 31.01426 | 34.50657 | 32.78191 | 4.357082 |
| 26 stop        | 30.07647 | 29.66918 | 29.74121 | 29.0187  | 28.54227 | 27.07401 | 29.02031 | 29.34394 | 1.102071 |
| 27 stop        | 16.8803  | 18.56899 | 16.19341 | 13.54204 | 15.55079 | 15.63474 | 16.06171 | 15.91408 | 1.659273 |
| 28 stop        | 37.13387 | 34.86412 | 35.47063 | 34.1813  | 32.85592 | 28.76301 | 33.87814 | 34.52271 | 2.877826 |
| 29 stop        | 53.30052 | 54.42541 | 56.84124 | 62.69524 | 68.25437 | 61.07753 | 59.43239 | 58.95939 | 5.666811 |
| 30 stop        | 33.36469 | 34.80533 | 32.35794 | 21.28469 | 15.89951 | 17.01645 | 25.7881  | 26.82131 | 8.681991 |
| 31 stop        | 18.14485 | 18.81833 | 17.962   | 14.29412 | 14.97819 | 14.67964 | 16.47952 | 16.4701  | 2.035221 |
| 32 stop        | 29.45035 | 28.74835 | 28.89986 | 30.01421 | 27.54527 | 26.26672 | 28.48746 | 28.82411 | 1.364968 |
| 33 stop        | 13.31688 | 14.7367  | 17.20581 | 16.49106 | 17.54929 | 14.63198 | 15.65529 | 15.61388 | 1.676246 |
| 34 stop        | 19.87593 | 19.42957 | 20.02487 | 10.03776 | 10.57553 | 11.01304 | 15.15945 | 15.22131 | 5.071255 |
| 11 eyes opened | 36.82474 | 37.98279 | 36.81911 | 21.6415  | 19.88627 | 16.50431 | 28.27645 | 29.23031 | 9.932415 |
| 12 eyes opened | 23.77455 | 23.58665 | 21.56289 | 18.27062 | 13.05712 | 17.8066  | 19.6764  | 19.91676 | 4.121432 |
| 13 eyes opened | 21.4077  | 20.9273  | 18.63899 | 11.7651  | 6.803013 | 6.803013 | 14.39085 | 15.20204 | 6.812534 |
| 14 eyes opened | 53.07003 | 55.22708 | 51.20573 | 46.35038 | 47.69447 | 42.66953 | 49.36954 | 49.4501  | 4.651608 |
| 15 eyes opened | 39.31977 | 44.14567 | 39.79155 | 22.51793 | 28.35262 | 24.72863 | 33.14269 | 33.8362  | 9.056001 |
| 16 eyes opened | 12.88264 | 13.52933 | 11.03849 | 12.18051 | 7.473993 | 10.54089 | 11.27431 | 11.6095  | 2.169283 |
| 17 eyes opened | 31.5398  | 31.27116 | 35.38817 | 28.14    | 24.53765 | 22.62007 | 28.91614 | 29.70558 | 4.769295 |
| 18 eyes opened | 66.73754 | 72.5319  | 73.72595 | 62.8315  | 63.73208 | 58.39883 | 66.3263  | 65.23481 | 5.919828 |
| 19 eyes opened | 28.48118 | 26.7605  | 21.83174 | 18.25893 | 14.92835 | 15.4899  | 20.95843 | 20.04533 | 5.737114 |
| 20 eyes opened | 50.45058 | 51.32604 | 20.22062 | 45.48096 | 7.6888   | 7.688799 | 30.47597 | 32.85079 | 20.98829 |
| 21 eyes opened | 65.91637 | 65.57383 | 69.86873 | 11.91231 | 30.60403 | 36.44    | 46.71921 | 51.00691 | 23.81936 |
| 22 eyes opened | 29.79589 | 40.78132 | 39.53078 | 26.71113 | 15.70488 | 24.40612 | 29.48835 | 28.25351 | 9.507914 |
| 23 eyes opened | 16.2169  | 10.84845 | 15.73826 | 15.87162 | 15.47842 | 17.25315 | 15.23447 | 15.80494 | 2.235921 |
| 24 eyes opened | 18.32664 | 18.13668 | 15.79093 | 16.47942 | 14.5778  | 15.66381 | 16.49588 | 16.13517 | 1.477331 |

|                |          |          |          |          |          |          |          |          |          |
|----------------|----------|----------|----------|----------|----------|----------|----------|----------|----------|
| 25 eyes opened | 57.64729 | 56.51617 | 51.67059 | 56.08235 | 45.51575 | 47.17165 | 52.43397 | 53.87647 | 5.163147 |
| 26 eyes opened | 35.64493 | 34.9162  | 35.21076 | 32.20155 | 33.23344 | 31.72927 | 33.82269 | 34.07482 | 1.66137  |
| 27 eyes opened | 21.96808 | 23.75918 | 22.63516 | 20.5241  | 19.44001 | 17.15044 | 20.91283 | 21.24609 | 2.39406  |
| 28 eyes opened | 40.58305 | 36.70162 | 37.13716 | 32.52566 | 32.63061 | 25.93451 | 34.2521  | 34.66612 | 5.083243 |
| 29 eyes opened | 63.40863 | 60.8193  | 63.63084 | 73.29092 | 67.75085 | 56.45195 | 64.22541 | 63.51973 | 5.790701 |
| 30 eyes opened | 52.13607 | 54.77295 | 54.16117 | 30.82372 | 24.70396 | 23.30958 | 39.98457 | 41.47989 | 15.24995 |
| 31 eyes opened | 22.46689 | 25.14907 | 23.96269 | 11.13521 | 12.18218 | 12.21844 | 17.85241 | 17.34266 | 6.646567 |
| 32 eyes opened | 28.50538 | 26.98707 | 27.47695 | 32.13695 | 28.04563 | 25.25236 | 28.06739 | 27.76129 | 2.28883  |
| 33 eyes opened | 16.18004 | 16.22208 | 20.34561 | 19.68363 | 18.91303 | 15.24479 | 17.76486 | 17.56756 | 2.140224 |
| 34 eyes opened | 24.94128 | 26.1229  | 24.20117 | 12.96135 | 9.895231 | 12.93256 | 18.50908 | 18.58126 | 7.318697 |
| 11 eyes closed | 51.60507 | 54.91107 | 52.99913 | 55.71915 | 47.64658 | 42.83196 | 50.95216 | 52.3021  | 4.896491 |
| 12 eyes closed | 26.11778 | 23.22685 | 17.48526 | 22.93454 | 14.61008 | 21.09037 | 20.91081 | 22.01245 | 4.196138 |
| 13 eyes closed | 53.37911 | 51.20842 | 60.97978 | 47.79822 | 6.803013 | 6.803013 | 37.82859 | 49.50332 | 24.41877 |
| 14 eyes closed | 52.09982 | 55.85984 | 53.74646 | 48.89069 | 54.26746 | 45.21171 | 51.67933 | 52.92314 | 3.955543 |
| 15 eyes closed | 62.39187 | 28.91862 | 60.70664 | 58.94856 | 53.20988 | 39.71686 | 50.64874 | 56.07922 | 13.46264 |
| 16 eyes closed | 26.66381 | 39.43365 | 41.98971 | 27.07541 | 31.83605 | 28.31892 | 32.55293 | 30.07749 | 6.626052 |
| 17 eyes closed | 40.87423 | 35.94081 | 30.59329 | 28.22465 | 15.4639  | 13.58    | 27.44614 | 29.40897 | 10.94374 |
| 18 eyes closed | 71.58347 | 75.02413 | 77.6039  | 75.24202 | 78.6591  | 72.4363  | 75.09149 | 75.13308 | 2.77213  |
| 19 eyes closed | 53.25941 | 60.1374  | 51.69625 | 32.99709 | 36.05691 | 29.78278 | 43.98831 | 43.87658 | 12.58308 |
| 20 eyes closed | 58.61087 | 49.82015 | 15.73152 | 35.87696 | 16.19664 | 16.19656 | 32.07212 | 26.0368  | 18.99923 |
| 21 eyes closed | 64.89203 | 60.98189 | 59.87933 | 16.96939 | 55.23286 | 53.07319 | 51.83811 | 57.55609 | 17.59291 |
| 22 eyes closed | 23.58164 | 69.06334 | 42.65645 | 32.63574 | 24.80315 | 29.54195 | 37.04705 | 31.08885 | 17.10862 |
| 23 eyes closed | 40.61002 | 7.248993 | 36.61933 | 42.12515 | 32.01623 | 45.54062 | 34.02672 | 38.61467 | 13.9234  |
| 24 eyes closed | 29.60145 | 33.42619 | 26.01781 | 28.52138 | 24.33404 | 15.04588 | 26.15779 | 27.26959 | 6.278458 |
| 25 eyes closed | 53.78436 | 54.56909 | 59.31627 | 65.89739 | 60.3092  | 60.41757 | 59.04898 | 59.81273 | 4.432131 |
| 26 eyes closed | 34.36281 | 32.4625  | 35.14192 | 27.67637 | 28.24211 | 25.13109 | 30.5028  | 30.3523  | 4.055028 |
| 27 eyes closed | 23.48886 | 25.18594 | 19.7665  | 22.84193 | 14.01999 | 19.30855 | 20.76863 | 21.30421 | 3.997275 |
| 28 eyes closed | 64.54673 | 62.23493 | 68.65919 | 76.53968 | 82.44006 | 12.60187 | 61.17041 | 66.60296 | 24.9645  |
| 29 eyes closed | 47.07292 | 50.60498 | 49.13529 | 54.29325 | 67.77819 | 46.57157 | 52.57603 | 49.87013 | 7.951303 |
| 30 eyes closed | 72.11824 | 70.1333  | 62.28693 | 49.14149 | 26.38968 | 34.40176 | 52.4119  | 55.71421 | 19.03744 |
| 31 eyes closed | 37.3071  | 39.4622  | 36.88579 | 21.18316 | 25.01038 | 21.76759 | 30.26937 | 30.94809 | 8.488949 |
| 32 eyes closed | 53.74238 | 51.41492 | 50.59326 | 68.91674 | 71.99871 | 60.37177 | 59.5063  | 57.05707 | 9.203274 |
| 33 eyes closed | 14.51959 | 14.61066 | 39.81741 | 47.19571 | 24.52056 | 11.91759 | 25.43025 | 19.56561 | 14.83409 |

34 eyes closed    48.96253   43.12581   60.66173   23.28054   22.87211   20.13948   36.50703   33.20317   16.79967
