# Supplementary material
Source: Frontiers journal article supplement (https://www.frontiersin.org/articles/318948)
Supplement: Data_Sheet_1.ZIP [file Data_Sheet_1.ZIP]

| BR8+ (all tasks) |             |             |             |             |             |             |             |             |             |             |            |
|------------------|-------------|-------------|-------------|-------------|-------------|-------------|-------------|-------------|-------------|-------------|------------|
| SNR [dB]         |             |             |             |             |             |             |             |             |             |             |            |
| Vp               | Fp1         | Fp2         | Fz          | C3          | C4          | Pz          | O1          | O2          | mean        | median      | std        |
| 11               | -11.3020782 | -9.56242752 | -6.02591658 | 0.78067601  | -0.47385412 | -1.34695458 | -8.17659283 | -5.76838779 | -5.23444196 | -5.89715219 | 4.45730299 |
| 12               | -9.8944273  | -11.0369797 | -0.10639673 | -10.3856258 | -6.70644331 | 1.59623301  | -7.51259136 | -6.89282799 | -6.3673824  | -7.20270967 | 4.70126329 |
| 13               | 10.0468292  | 9.04009914  | -1.01198637 | -4.31041718 | 13.7089119  | 9.75492859  | 8.34288406  | 1.81305575  | 5.92303814  | 8.6914916   | 6.29728648 |
| 14               | -19.5399361 | -10.8130131 | -9.87701225 | -10.3153028 | 6.07990599  | 6.0239706   | -4.19906139 | -6.0191555  | -6.08245057 | -7.94808388 | 8.73283938 |
| 15               | -12.7124701 | -7.11079979 | -10.5130243 | 7.71993828  | -2.78116822 | 1.17401159  | -6.97603655 | -8.09060097 | -4.91126876 | -7.04341817 | 6.68220579 |
| 16               | -5.16462564 | -1.37621152 | 0.86716539  | 10.1110554  | 10.7143135  | 10.756299   | 10.4278173  | 9.43133831  | 5.72089397  | 9.77119684  | 6.523668   |
| 17               | -0.14180753 | -0.66265696 | -2.94733334 | -1.71982217 | -4.44E+01   | -0.63431454 | -1.03808534 | -2.42330885 | -6.75004283 | -1.37895375 | 15.2561196 |
| 18               | -4.85798788 | -8.95226955 | -6.76457119 | -6.16499853 | -10.4107265 | 6.05264473  | -8.55083752 | -11.9369049 | -6.44820642 | -7.65770435 | 5.54847642 |
| 19               | -10.0450172 | -9.25219154 | -9.8677454  | -6.67406607 | -11.0544167 | 4.47372913  | -15.8586035 | -16.0684509 | -9.29334527 | -9.95638132 | 6.42979277 |
| 20               | -15.8554955 | -2.50243807 | -10.1888847 | 5.60815477  | 3.9595027   | -9.97754955 | -8.77288532 | -10.4901648 | -6.02747005 | -9.37521744 | 7.60184914 |
| 21               | 11.5681801  | 11.6035852  | -2.12095356 | 11.6369905  | -3.7901597  | -3.5765295  | -1.64902377 | -5.0504365  | 2.32770661  | -1.88498867 | 7.74985061 |
| 22               | -7.33201647 | -5.98705578 | -6.66293097 | 2.8521266   | -27.3236122 | -11.6339645 | -9.63493347 | -12.397665  | -9.76500648 | -8.48347497 | 8.51681296 |
| 23               | -7.00567341 | -9.72003174 | -9.22327518 | -11.7664528 | 4.32997561  | 10.1716824  | 5.19780016  | 7.30372763  | -1.33903092 | -1.3378489  | 8.90670724 |
| 24               | -12.3486691 | -2.55316043 | -9.18942165 | 3.48199129  | -6.96554756 | 5.62094736  | 2.24583983  | -1.41318369 | -2.64015049 | -1.98317206 | 6.40278532 |
| 25               | -26.5071011 | -7.64252758 | -6.26658392 | -6.01108599 | -1.68123007 | -6.57274961 | -8.3792696  | -6.42759418 | -8.68601775 | -6.5001719  | 7.46818324 |
| 26               | -13.7170324 | -3.33505487 | -5.84612799 | 3.36594057  | 1.71537244  | -2.50950956 | -3.61618614 | -5.70571709 | -3.70603938 | -3.47562051 | 5.20687273 |
| 27               | -13.3861628 | -13.4955997 | -15.2782173 | -5.00713873 | -8.8439188  | 1.0840292   | -6.65759659 | -10.4437304 | -9.00354189 | -9.64382458 | 5.39961522 |
| 28               | -7.45494604 | -7.44954634 | -7.8530612  | 7.18597651  | -1.45427418 | -2.46036744 | -9.37967205 | -10.5809832 | -4.93085924 | -7.45224619 | 5.83067726 |
| 29               | 8.54581642  | -0.42905453 | 3.15757489  | 3.23673892  | -14.3362236 | 8.13924885  | 0.37379628  | -0.16363311 | 1.06553302  | 1.76568559  | 7.13662703 |
| 30               | -23.1676769 | -8.57053089 | -7.93848658 | -9.51631451 | -5.99509764 | -4.10187197 | -8.06021881 | -6.48011303 | -9.22878879 | -7.99935269 | 5.88140248 |
| 31               | -7.56227303 | -5.27493334 | 1.10224211  | -2.6275785  | -35.8000145 | -10.8791676 | -8.71741486 | -1.44485319 | -8.90049911 | -6.41860318 | 11.5724993 |
| 32               | -1.33450389 | -1.15080917 | -3.00595999 | 9.0882864   | 12.2840986  | 9.18802738  | 11.4907999  | 10.1789932  | 5.84236656  | 9.13815689  | 6.46574869 |
| 33               | -8.45191765 | -17.0178642 | -1.64020431 | 0.34076518  | -25.9229221 | -7.54787159 | -16.9366989 | -2.71073651 | -9.98593127 | -7.99989462 | 9.17501685 |
| 34               | 13.647397   | 12.7239065  | 1.66931486  | 16.7312088  | 14.4624166  | 14.5971251  | 9.8982048   | 16.7104912  | 12.5550081  | 14.0549068  | 4.91783783 |
