# Supplementary material
Source: Frontiers journal article supplement (https://www.frontiersin.org/articles/318948)
Supplement: Data_Sheet_1.ZIP [file Data_Sheet_1.ZIP]

# **g.SAHARA (tasks: 0-back, stop)**

## **frontal theta**

| <b>Vp</b> | <b>Task</b> | <b>Fp1</b> | <b>Fp2</b> | <b>F3</b> | <b>Fz</b> | <b>F4</b> | <b>mean</b> | <b>median</b> | <b>std</b> |
|-----------|-------------|------------|------------|-----------|-----------|-----------|-------------|---------------|------------|
|           | 11 0-back   | 15.68666   | 16.79402   | 12.01607  | 15.38409  | 11.51234  | 14.27864    | 15.38409      | 2.36132    |
|           | 12 0-back   | 24.64969   | 29.38335   | 23.78312  | 20.3017   | 26.05564  | 24.8347     | 24.64969      | 3.31169    |
|           | 13 0-back   | 25.18799   | 26.5188    | 18.58765  | 16.74066  | 16.35313  | 20.67765    | 18.58765      | 4.82264    |
|           | 14 0-back   | 26.94188   | 26.49109   | 26.39827  | 28.27927  | 25.00465  | 26.62303    | 26.49109      | 1.176      |
|           | 15 0-back   | 37.61615   | 34.35134   | 26.21563  | 26.09918  | 30.36845  | 30.93015    | 30.36845      | 5.05687    |
|           | 16 0-back   | 24.29199   | 25.35577   | 18.859    | 18.89456  | 18.88947  | 21.25816    | 18.89456      | 3.27673    |
|           | 17 0-back   | 27.94435   | 24.46345   | 20.30874  | 19.19703  | 20.18394  | 22.4195     | 20.30874      | 3.69253    |
|           | 18 0-back   | 28.93228   | 30.04831   | 25.89684  | 22.75496  | 27.33919  | 26.99432    | 27.33919      | 2.84509    |
|           | 19 0-back   | 20.95317   | 23.41728   | 20.48639  | 23.50015  | 22.77174  | 22.22575    | 22.77174      | 1.41305    |
|           | 20 0-back   | 33.46267   | 33.08421   | 37.86207  | 43.33033  | 39.86685  | 37.52122    | 37.86207      | 4.34519    |
|           | 21 0-back   | 15.59142   | 24.7534    | 29.23296  | 29.72728  | 23.45768  | 24.55255    | 24.7534       | 5.70581    |
|           | 22 0-back   | 29.45101   | 30.16184   | 24.71587  | 22.38117  | 22.52378  | 25.84673    | 24.71587      | 3.73972    |
|           | 23 0-back   | 29.32254   | 25.51857   | 22.15475  | 19.47385  | 27.88433  | 24.87081    | 25.51857      | 4.05657    |
|           | 24 0-back   | 28.95167   | 21.75208   | 23.59691  | 24.26888  | 19.66266  | 23.64644    | 23.59691      | 3.4639     |
|           | 25 0-back   | 26.38309   | 24.20512   | 27.44227  | 26.18177  | 35.39106  | 27.92066    | 26.38309      | 4.33673    |
|           | 26 0-back   | 41.14441   | 41.72723   | 29.09396  | 24.62994  | 30.73786  | 33.46668    | 30.73786      | 7.61313    |
|           | 27 0-back   | 38.29687   | 37.89146   | 27.37989  | 29.54947  | 29.51266  | 32.52607    | 29.54947      | 5.16027    |
|           | 28 0-back   | 34.1337    | 32.63583   | 26.41342  | 18.55748  | 25.53438  | 27.45496    | 26.41342      | 6.23269    |
|           | 29 0-back   | 32.14276   | 29.99834   | 20.36609  | 21.74788  | 20.94392  | 25.0398     | 21.74788      | 5.57888    |
|           | 30 0-back   | 19.37008   | 19.04314   | 20.50652  | 21.52606  | 20.99449  | 20.28806    | 20.50652      | 1.05734    |
|           | 31 0-back   | 37.75778   | 34.16055   | 23.84808  | 22.43856  | 19.75512  | 27.59202    | 23.84808      | 7.88163    |
|           | 32 0-back   | 42.10943   | 39.53136   | 26.38151  | 24.43731  | 26.33885  | 31.75969    | 26.38151      | 8.35828    |
|           | 33 0-back   | 22.79455   | 24.56499   | 22.11746  | 16.95961  | 24.54378  | 22.19608    | 22.79455      | 3.11883    |
|           | 34 0-back   | 29.08026   | 32.32344   | 27.44201  | 28.55042  | 28.33788  | 29.1468     | 28.55042      | 1.87161    |
|           | 11 stop     | 11.09356   | 13.57211   | 24.26328  | 14.64387  | 9.226312  | 14.55983    | 13.57211      | 5.82239    |
|           | 12 stop     | 32.98811   | 33.55923   | 23.55537  | 23.11473  | 27.38143  | 28.11977    | 27.38143      | 4.99294    |
|           | 13 stop     | 26.95353   | 28.35784   | 20.23961  | 22.36639  | 23.39166  | 24.26181    | 23.39166      | 3.33732    |
|           | 14 stop     | 27.20787   | 28.94363   | 25.79211  | 25.79921  | 24.59736  | 26.46804    | 25.79921      | 1.6643     |
|           | 15 stop     | 52.47572   | 52.61128   | 42.98033  | 44.65654  | 44.97396  | 47.53957    | 44.97396      | 4.63057    |

|         |          |          |          |          |          |          |          |         |
|---------|----------|----------|----------|----------|----------|----------|----------|---------|
| 16 stop | 23.1694  | 24.73221 | 21.20795 | 20.28748 | 20.68064 | 22.01553 | 21.20795 | 1.87963 |
| 17 stop | 30.39768 | 28.77641 | 22.12893 | 22.17936 | 22.6629  | 25.22906 | 22.6629  | 4.02477 |
| 18 stop | 27.29068 | 28.603   | 27.74433 | 25.91939 | 27.71987 | 27.45545 | 27.71987 | 0.98195 |
| 19 stop | 26.92339 | 35.06374 | 22.31957 | 19.76422 | 24.31172 | 25.67653 | 24.31172 | 5.8686  |
| 20 stop | 32.48655 | 31.30016 | 37.61032 | 41.02824 | 37.62868 | 36.01079 | 37.61032 | 4.02993 |
| 21 stop | 25.51459 | 29.24724 | 29.06993 | 31.14501 | 23.14589 | 27.62453 | 29.06993 | 3.22592 |
| 22 stop | 37.38243 | 37.81525 | 30.81499 | 29.72722 | 30.02416 | 33.15281 | 30.81499 | 4.08095 |
| 23 stop | 23.86381 | 31.63216 | 21.07701 | 21.68757 | 29.58016 | 25.56814 | 23.86381 | 4.76976 |
| 24 stop | 37.3303  | 30.17651 | 34.37256 | 31.72912 | 28.14169 | 32.35004 | 31.72912 | 3.59561 |
| 25 stop | 29.92299 | 32.2996  | 23.36019 | 29.65356 | 29.85506 | 29.01828 | 29.85506 | 3.34303 |
| 26 stop | 38.32663 | 40.02118 | 31.27571 | 28.92456 | 25.40642 | 32.7909  | 31.27571 | 6.21885 |
| 27 stop | 33.15752 | 31.11736 | 28.56463 | 27.5175  | 27.85895 | 29.64319 | 28.56463 | 2.41811 |
| 28 stop | 27.282   | 27.05186 | 26.50904 | 20.30718 | 21.98564 | 24.62715 | 26.50904 | 3.24456 |
| 29 stop | 33.77363 | 33.54174 | 23.29434 | 25.67867 | 23.44347 | 27.94637 | 25.67867 | 5.29918 |
| 30 stop | 13.85498 | 14.62414 | 15.79596 | 19.9393  | 17.39805 | 16.32248 | 15.79596 | 2.42324 |
| 31 stop | 38.10052 | 37.53535 | 32.32985 | 27.91134 | 30.52706 | 33.28082 | 32.32985 | 4.43422 |
| 32 stop | 38.85005 | 36.6294  | 27.72779 | 23.63665 | 29.8536  | 31.3395  | 29.8536  | 6.30432 |
| 33 stop | 25.4191  | 25.05975 | 22.91635 | 24.226   | 33.5471  | 26.23366 | 25.05975 | 4.2001  |
| 34 stop | 27.39301 | 30.17717 | 26.29618 | 26.13152 | 25.55544 | 27.11066 | 26.29618 | 1.83875 |
