# Supplementary material
Source: Frontiers journal article supplement (https://www.frontiersin.org/articles/318948)
Supplement: Data_Sheet_1.ZIP [file Data_Sheet_1.ZIP]

# Jellyfish (tasks: 0-back, stop)

## frontal theta

| Vp | Task      | AF8      | Fp2      | Fp1      | AF7      | mean     | median   | std      |
|----|-----------|----------|----------|----------|----------|----------|----------|----------|
|    | 11 0-back | 32.0411  | 32.81329 | 32.43496 | 31.84996 | 32.28483 | 32.23803 | 0.428299 |
|    | 12 0-back | 33.27567 | 33.53272 | 28.45086 | 32.43185 | 31.92278 | 32.85376 | 2.361891 |
|    | 13 0-back | 27.94036 | 32.23408 | 39.64414 | 28.471   | 32.07239 | 30.35254 | 5.397569 |
|    | 14 0-back | 30.2861  | 38.28894 | 31.37775 | 25.56728 | 31.38002 | 30.83193 | 5.25096  |
|    | 15 0-back | 38.21672 | 33.93098 | 39.22526 | 38.87482 | 37.56195 | 38.54577 | 2.456482 |
|    | 16 0-back | 27.85275 | 32.99509 | 30.89724 | 30.67796 | 30.60576 | 30.7876  | 2.111725 |
|    | 17 0-back | 26.1839  | 28.77931 | 47.07084 | 29.31902 | 32.83827 | 29.04916 | 9.586567 |
|    | 18 0-back | 23.0717  | 23.74282 | 22.11192 | 22.70736 | 22.90845 | 22.88953 | 0.682575 |
|    | 19 0-back | 26.74654 | 29.21556 | 35.58349 | 28.56736 | 30.02824 | 28.89146 | 3.848158 |
|    | 20 0-back | 35.1031  | 38.05287 | 34.3726  | 26.22792 | 33.43912 | 34.73785 | 5.063872 |
|    | 21 0-back | 31.87458 | 40.72317 | 34.22876 | 39.10111 | 36.48191 | 36.66494 | 4.129274 |
|    | 22 0-back | 35.08952 | 35.00618 | 27.24342 | 59.20418 | 39.13583 | 35.04785 | 13.87557 |
|    | 23 0-back | 13.48836 | 32.99574 | 32.85582 | 9.585323 | 22.23131 | 23.17209 | 12.45142 |
|    | 24 0-back | 24.81583 | 32.46479 | 34.5647  | 34.90568 | 31.68775 | 33.51474 | 4.706695 |
|    | 25 0-back | 21.99099 | 27.73904 | 34.13085 | 22.61047 | 26.61784 | 25.17476 | 5.632326 |
|    | 26 0-back | 48.23691 | 48.04822 | 42.14523 | 45.51114 | 45.98538 | 46.77968 | 2.845838 |
|    | 27 0-back | 39.45116 | 39.61144 | 41.0221  | 40.08967 | 40.04359 | 39.85056 | 0.70648  |
|    | 28 0-back | 20.13065 | 37.27853 | 38.86764 | 42.82463 | 34.77536 | 38.07308 | 10.03778 |
|    | 29 0-back | 36.5552  | 36.63529 | 36.58984 | 40.62725 | 37.60189 | 36.61256 | 2.017173 |
|    | 30 0-back | 11.47257 | 20.1197  | 36.12626 | 13.41947 | 20.2845  | 16.76959 | 11.19177 |
|    | 31 0-back | 33.98608 | 36.81038 | 37.70093 | 37.49053 | 36.49698 | 37.15045 | 1.716535 |
|    | 32 0-back | 60.19743 | 41.6487  | 35.78387 | 35.4459  | 43.26897 | 38.71628 | 11.63937 |
|    | 33 0-back | 31.65    | 40.13671 | 37.46624 | 41.83658 | 37.77238 | 38.80148 | 4.460382 |
|    | 34 0-back | 35.00564 | 38.45543 | 34.99545 | 19.8904  | 32.08673 | 35.00055 | 8.292398 |
|    | 11 stop   | 37.24966 | 38.79077 | 36.87978 | 36.02218 | 37.2356  | 37.06472 | 1.157258 |
|    | 12 stop   | 35.74748 | 36.31137 | 37.81783 | 35.37319 | 36.31247 | 36.02942 | 1.075109 |
|    | 13 stop   | 34.94759 | 35.44937 | 33.91905 | 33.76875 | 34.52119 | 34.43332 | 0.810775 |
|    | 14 stop   | 37.30075 | 36.50851 | 34.36313 | 31.14759 | 34.83    | 35.43582 | 2.750763 |
|    | 15 stop   | 50.83673 | 37.62489 | 51.57378 | 51.65064 | 47.92151 | 51.20526 | 6.874211 |

|         |          |          |          |          |          |          |          |
|---------|----------|----------|----------|----------|----------|----------|----------|
| 16 stop | 28.84452 | 29.49261 | 28.32366 | 24.42081 | 27.7704  | 28.58409 | 2.28368  |
| 17 stop | 30.81839 | 31.73397 | 36.07894 | 33.17627 | 32.95189 | 32.45512 | 2.299561 |
| 18 stop | 28.57701 | 28.97931 | 28.84275 | 28.47324 | 28.71808 | 28.70988 | 0.233544 |
| 19 stop | 31.3648  | 33.53528 | 40.18544 | 32.96978 | 34.51383 | 33.25253 | 3.891235 |
| 20 stop | 30.67778 | 39.09108 | 32.46626 | 30.58828 | 33.20585 | 31.57202 | 4.017701 |
| 21 stop | 35.99428 | 37.61433 | 43.00093 | 38.04291 | 38.66311 | 37.82862 | 3.023461 |
| 22 stop | 24.11541 | 34.88397 | 32.41926 | 28.05652 | 29.86879 | 30.23789 | 4.762447 |
| 23 stop | 32.42293 | 32.69623 | 35.7481  | 38.93204 | 34.94983 | 34.22216 | 3.052823 |
| 24 stop | 32.41241 | 35.29512 | 34.77265 | 31.67749 | 33.53942 | 33.59253 | 1.764488 |
| 25 stop | 53.45837 | 29.77495 | 30.06645 | 35.23451 | 37.13357 | 32.65048 | 11.16839 |
| 26 stop | 43.32594 | 43.24275 | 40.056   | 40.34243 | 41.74178 | 41.79259 | 1.785355 |
| 27 stop | 31.449   | 31.84215 | 32.4134  | 34.05471 | 32.43982 | 32.12777 | 1.1471   |
| 28 stop | 31.24584 | 48.14439 | 38.54622 | 38.6569  | 39.14834 | 38.60156 | 6.927783 |
| 29 stop | 39.80511 | 40.86031 | 44.93934 | 43.08662 | 42.17284 | 41.97346 | 2.296183 |
| 30 stop | 16.80958 | 18.28006 | 27.24229 | 17.71893 | 20.01272 | 17.9995  | 4.857651 |
| 31 stop | 26.97739 | 36.17086 | 35.58727 | 36.0638  | 33.69983 | 35.82553 | 4.488801 |
| 32 stop | 31.01117 | 41.89069 | 42.15662 | 42.05598 | 39.27861 | 41.97334 | 5.512722 |
| 33 stop | 25.76716 | 28.58512 | 28.62858 | 31.01484 | 28.49893 | 28.60685 | 2.146051 |
| 34 stop | 40.87401 | 38.20197 | 39.97591 | 30.52821 | 37.39503 | 39.08894 | 4.710574 |
